1 **Gamblers: an Antibiotic-induced Evolvable Cell Subpopulation Differentiated by Reactive-**  
2 **oxygen-induced General Stress Response**

3  
4  
5 John P Pribis<sup>1,2,3,4,5</sup>, Libertad García-Villada<sup>1,2,3,4</sup>, Yin Zhai<sup>1,2,3,4</sup>, Ohad Lewin-Epstein<sup>10</sup>, Anthony  
6 Wang<sup>6</sup>, Jingjing Liu<sup>1,2,3,4</sup>, Jun Xia<sup>1,2,3,4</sup>, Qian Mei<sup>1,2,3,4,7</sup>, Devon M. Fitzgerald<sup>2,3,4</sup>, Julia Bos<sup>8,9</sup>,  
7 Robert Austin<sup>9</sup>, Christophe Herman<sup>1,3,4,5</sup>, David Bates<sup>1,3,4,5</sup>, Lilach Hadany<sup>10</sup>, P.J. Hastings<sup>1,4</sup>, and  
8 Susan M Rosenberg<sup>1,2,3,4,5\*</sup>

9  
10 <sup>1</sup>Department of Molecular and Human Genetics

11 <sup>2</sup>Department of Biochemistry and Molecular Biology

12 <sup>3</sup>Department of Molecular Virology and Microbiology

13 <sup>4</sup>The Dan L. Duncan Comprehensive Cancer Center

14 <sup>5</sup>Graduate Program in Integrative Molecular and Biomedical Sciences

15 Baylor College of Medicine, Houston, TX 77030, USA

16 <sup>6</sup>Department of Biochemistry and Cell Biology

17 <sup>7</sup>Systems, Synthetic, and Physical Biology Program

18 Rice University, Houston, TX 77030, USA

19 <sup>8</sup>Department of Physics

20 <sup>9</sup>Lewis Sigler Institute

21 Princeton University, Princeton, NJ 08544-0708, USA

22 <sup>10</sup>Department of Molecular Biology and Ecology of Plants

23 Tel-Aviv University, Tel-Aviv, Israel

24  
25 \*Correspondence: [smr@bcm.edu](mailto:smr@bcm.edu)

26  
27  
28 **Short title:** Differentiation of Evolvable Cells

29

30

31 **SUMMARY**

32

33 Antibiotics can induce mutations that cause antibiotic resistance. Yet, despite their importance,  
34 mechanisms of antibiotic-promoted mutagenesis remain elusive. We report that the  
35 fluoroquinolone antibiotic ciprofloxacin (cipro) induces mutations that cause drug resistance by  
36 triggering differentiation of a mutant-generating cell subpopulation, using reactive oxygen species  
37 (ROS) to signal the sigma-S ( $\sigma^S$ ) general-stress response. Cipro-generated DNA breaks activate  
38 the SOS DNA-damage response and error-prone DNA polymerases in all cells. However,  
39 mutagenesis is restricted to a cell subpopulation in which electron transfer and SOS induce ROS,  
40 which activate the  $\sigma^S$  response, allowing mutagenesis during DNA-break repair. When sorted,  
41 this small  $\sigma^S$ -response-"on" subpopulation produces most antibiotic cross-resistant mutants. An  
42 FDA-approved drug prevents  $\sigma^S$  induction specifically inhibiting antibiotic-promoted mutagenesis.  
43 Furthermore, SOS-inhibited cell division, causing multi-chromosome cells, is required for  
44 mutagenesis. The data support a model in which within-cell chromosome cooperation together  
45 with development of a "gambler" cell subpopulation promote resistance evolution without risking  
46 most cells.

47

48

49

50 **KEYWORDS:** antibiotic resistance, bet hedging, ciprofloxacin, DinB, error-prone DNA  
51 polymerases, *Escherichia coli*, evolution, fluoroquinolones, general stress response, mutagenic  
52 break repair, reactive oxygen species (ROS), RpoS ( $\sigma^S$ ) stress response, SOS response,  
53 starvation stress response, stress-induced mutagenesis, transient differentiation

54

## 55 INTRODUCTION

56

57 Antibiotic resistance is a world health threat with 700,000 deaths from resistant infections world-  
58 wide annually (O'Neill, 2014). Resistance occurs both by uptake of resistance genes from other  
59 bacteria, and de novo mutation of resident genes. Formation of new mutations underpins  
60 resistance to diverse antibiotics (Blair et al., 2014; Cannatelli et al., 2014; Palmer et al., 2011),  
61 and is a principle resistance route among the World Health Organization's "priority pathogens" for  
62 which new antibiotics are needed (Magrini, 2017). Historically, the challenge of resistance has  
63 been met with development of new antibiotics. A complementary approach could be to discover,  
64 then inhibit, the molecular mechanisms that drive evolution of resistance (Al Mamun et al., 2012;  
65 Cirz et al., 2005; Rosenberg and Queitsch, 2014). Antibiotics not only select resistant mutants but  
66 can also induce their formation (Cirz et al., 2005; Gutierrez et al., 2013; Kohanski et al., 2010).  
67 Although detailed mechanisms are described by which antibiotics arrest cell growth, how  
68 antibiotics induce new mutations is poorly understood.

69 Fluoroquinolones are widely used antibiotics that inhibit bacterial type-II topoisomerases  
70 and kill cells via DNA double-strand breaks (DSBs), by arresting the topoisomerase at DNA  
71 double-strand cleavage (Drlica, 1999). Resistance to fluoroquinolones, including ciprofloxacin  
72 (cipro), the most used (Hicks et al., 2015), occurs primarily by de novo mutation (Jacoby, 2005).  
73 Cipro exposure at so-called "sub-inhibitory" concentrations (below minimal inhibitory  
74 concentration, MIC) occurs in ecosystems and during antibiotic therapies, and both induces and  
75 selects cipro resistance (Cirz et al., 2005). Another fluoroquinolone, norfloxacin, induced  
76 mutations that confer resistance to antibiotics not yet encountered or selected (Kohanski et al.,  
77 2010)—antibiotic "cross" resistance. The mutagenesis activity of norfloxacin required reactive  
78 oxygen species (ROS) induced by the antibiotic (Kohanski et al., 2010), as does its antibiotic  
79 (killing) activity (Kohanski et al., 2007). Yet, how the ROS might lead to mutagenesis—by what  
80 molecular mechanism—is unclear. The role of ROS in the antibiotic mechanism is to potentiate  
81 lethality by oxidizing DNA bases, the repair of which causes more lethal DNA breaks (Foti et al.,  
82 2012; Rasouly and Nudler, 2018; Zhao et al., 2015), but whether this is part of the ROS mutagenic  
83 activity is not known.

84 The general or starvation-stress response of *Escherichia coli*, activated by the sigma-S  
85 ( $\sigma^S$ ) transcriptional activator (encoded by the *rpoS* gene), promotes mutagenesis induced by  
86 starvation stress (Fitzgerald et al., 2017), and also by beta-lactam (membrane-targeting)  
87 antibiotics (Gutierrez et al., 2013). The former occurs by allowing mutagenic repair of  
88 spontaneous DSBs, which also requires an SOS DNA-damage response for the upregulation of  
89 error-prone DNA polymerase (Pol) IV (Galhardo et al., 2009). The latter occurs by downregulating  
90 post-replication error correction (mismatch repair) via a different, SOS-independent mutation  
91 mechanism (Gutierrez et al., 2013). The  $\sigma^S$  response upregulates Pol IV about two-fold (Layton  
92 and Foster, 2003), which might be part of how it promotes mutagenesis during starvation  
93 (Fitzgerald et al., 2017).

94 Bacterial regulatory programs transiently differentiate phenotypically distinct cell  
95 subpopulations both stochastically and in response to environmental signals. A potential "bet-  
96 hedging" strategy, these subpopulations can allow phenotypes that may be advantageous under  
97 stress conditions but deleterious in more permissive environments (Norman et al., 2015; Veening  
98 et al., 2008). For example, bacterial "persisters" are a subpopulation of transiently non-  
99 proliferating or slowly growing cells, present at about  $10^{-4}$  of the total, that can survive antibiotics  
100 without having a resistance mutation, and so lead to persistent infections by resuming growth  
101 once antibiotics have gone (Lewis, 2010). Persister formation can occur stochastically, leaving  
102 populations ready for a stress that they have not encountered (Balaban et al., 2004), and can also  
103 be induced responsively via stress-response regulons including the SOS- (Dorr et al., 2009) and  
104  $\sigma^S$ -response (Radzikowski et al., 2016) regulons. It is unknown whether antibiotics induce

105 transient differentiation that could promote resistance through mutagenesis, e.g., (Frenoy and  
106 Bonhoeffer, 2018).

107 Here we show that low, sub-inhibitory doses of cipro induce transient differentiation of a  
108 small cell subpopulation with high ROS and  $\sigma^S$ -response activity, that generates mutants,  
109 including cross-resistant mutants: a “gambler” subpopulation. We show that the ROS promote  
110 mutagenesis in gamblers by activating the  $\sigma^S$  response, which allows mutagenic repair of cipro-  
111 triggered DSBs—a novel signaling/differentiating role of ROS in mutagenesis. We elaborate the  
112 regulatory chain from cipro to ROS to  $\sigma^S$  response to mutant production, and also discover a  
113 requirement for SOS-induced inhibition of cell division, causing multiple chromosomes per cell.  
114 Mathematical analysis supports a model in which multiple chromosomes allow sharing of cellular  
115 resources (e.g., recombination, complementation), avoiding deleterious consequences of some  
116 mutations during mutagenesis and repair. Thus, multiple chromosomes allow higher mutation  
117 rates to be maintained – resulting in faster adaptation. The findings imply a highly regulated, novel  
118 transient differentiation process and support a model in which within-cell chromosome  
119 cooperation together with development of a gambler subpopulation drive evolution of resistance  
120 to new antibiotics without risk to most cells.

121

## 122 RESULTS

123

### 124 ROS-dependent Mutagenesis is $\sigma^S$ -dependent MBR

125 We developed two assays to detect mutagenesis induced by cipro independently of cipro  
126 selection of the mutants (Figure 1A) (fluctuation tests, **Methods**), and use them to dissect the  
127 mechanism of mutagenesis. In both assays, *E. coli* are grown in liquid with low-dose cipro—at  
128 the minimum antibiotic concentration (MAC) at which final cfu are 10% of those observed without  
129 cipro (Lorian and De Freitas, 1979). The cells are then removed from cipro and plated selectively  
130 for colonies with resistance to rifampicin (Rif<sup>R</sup>) or ampicillin (Amp<sup>R</sup>) antibiotics (Figure 1A), and  
131 mutation rates estimated (**Methods**). Rif<sup>R</sup> arises by specific base-substitution mutations in the  
132 RNA-polymerase-encoding *rpoB* gene (Reynolds, 2000) (Figure S1A), and Amp<sup>R</sup> occurs in  
133 engineered *E. coli* by *ampD* loss-of-function mutation (Petrosino et al., 2002) (Figures S1B and  
134 C, **Methods**). Strikingly, cipro exposure increased apparent Rif<sup>R</sup> and Amp<sup>R</sup> mutation rates by  
135 26- and 18-fold, above the no-cipro rates, respectively (Figure 1B). The Rif<sup>R</sup> or Amp<sup>R</sup> mutant  
136 cells are not selected in sub-inhibitory cipro, and in fact are at a slight but significant disadvantage  
137 (Figure 1C, legend) indicating that mutation rate increases are likely to be underestimates, and  
138 that mutation not selection of the mutants is elevated by low-dose cipro. Additional controls show  
139 negligible cell death in the low-dose cipro (Figure S1D), obviating potential concerns about death  
140 inflating apparent mutation rates (Frenoy and Bonhoeffer, 2018). Other controls for growth rate  
141 and colony formation are shown in Figure S2. We conclude that the Rif<sup>R</sup> and Amp<sup>R</sup> mutations  
142 in *rpoB* and *ampD* are induced, and not selected by growth in low-dose cipro.

143 Like mutagenesis induced by norfloxacin (Kohanski et al., 2010), the cipro-induced  
144 mutagenesis is ROS dependent, and is inhibited by ROS scavenging/preventing agents thiourea  
145 (TU) and 2,2'-bipyridine (BP) (Figure 1D, and below). Whereas the mechanism(s) by which  
146 fluoroquinolone-induced ROS promote mutagenesis are unknown, the following data indicate that  
147 the ROS instigate a  $\sigma^S$ -licensed mutagenic DNA break-repair (MBR) mechanism triggered by  
148 cipro-induced DSBs.

149 MBR in starving *E. coli* is regulated mutagenesis during repair of DSBs, requiring the SOS  
150 and general ( $\sigma^S$ ) stress responses (Figure 1E), reviewed (Fitzgerald et al., 2017), so that mutation  
151 formation, and potentially the ability to evolve, accelerate when cells are maladapted to their  
152 environments: when stressed. Spontaneous DSBs induce the SOS DNA-damage response and  
153 are repaired by homology-directed DSB repair (HR repair, Figure 1E). The SOS response  
154 transcriptionally upregulates error-prone DNA polymerases (Pols) IV, V and II; but repair  
155 synthesis does not become mutagenic unless the  $\sigma^S$  response is also induced (Ponder et al.,

156 2005; Shee et al., 2011) by starvation (Al Mamun et al., 2012) (Figure 1E). The  $\sigma^S$  response, by  
157 unknown means, allows use of, or persistence of errors made by, Pols IV, V and II in DSB repair  
158 causing mutations (Frisch et al., 2010; Ponder et al., 2005; Shee et al., 2011) near DSBs (Shee  
159 et al., 2012).

160 We find that most cipro-induced *ampD* and *rpoB* mutagenesis requires proteins used in  
161 starvation-stress-induced MBR (Figure 1F): DSB-repair proteins RecA, RecB, and RuvC, the SOS  
162 and general-stress-response activators, and SOS-upregulated error-prone DNA Pols IV, V, and  
163 II, implying a MBR-like mutagenesis mechanism. Isogenic strains grown at their appropriate  
164 MACs (Table S1) showed  $87\% \pm 3\%$  and  $70\% \pm 9\%$  decreases in cipro-induction of mutagenesis  
165 (AmpR and RifR combined) when carrying an SOS non-inducible *lexAInd* mutation or  $\Delta rpoS$  ( $\sigma^S$ )  
166 deletion, respectively (mean  $\pm$  95% CI, Figure 1F). Thus both stress responses are required for  
167 the mutagenesis. Moreover, double-defective mutant cells show no further reduction (Figure S1E),  
168 indicating their action in the same mutagenesis pathway. Further, ROS and the  $\sigma^S$  response also  
169 act in the same mutagenesis pathway, in that scavenging ROS with thiourea (TU) caused no  
170 further reduction of mutagenesis to  $\Delta rpoS$  cells (Figure S1F, and additional controls Figures S1D  
171 and S2). We conclude that cipro-induced ROS-dependent mutagenesis occurs by the  $\sigma^S$ -  
172 dependent MBR pathway.

173 Moreover, the mutagenesis also requires DSBs and their repair. We visualized and  
174 quantified cipro-induced DSBs as fluorescent foci of the GamGFP DSB-end-specific binding  
175 protein (Shee et al., 2013), under our low-dose exposure conditions (8.5 ng/ml) and found that  
176 cipro increased GamGFP (DSB) foci by  $28 \pm 9$  times above the spontaneous DSB level (mean  $\pm$   
177 SEM Figures 1G, Figure S3A,B, additional controls Figure S4A). We also show that GamGFP  
178 protein, which binds DSB ends and prevents their repair (Shee et al., 2013), inhibited cipro-  
179 induction of mutagenesis (Figure 1H), indicating a requirement for reparable DSBs in  
180 mutagenesis. Additionally, RecBCD, interacts specifically with DSB ends in DSB repair (Kuzminov,  
181 1999), and its requirement in cipro-induced RifR and AmpR mutagenesis (Figure 1F, *recB*) also  
182 implies the necessity of DSBs in the mutagenesis. The data indicate that DSBs and DSB repair  
183 are necessary for mutation formation, and support a MBR mutagenesis mechanism.

184 The following data implicate specifically cipro-induced DSBs in the MBR mutagenesis.  
185 First, cipro antibiotic activity results from DSBs caused by inhibition of *E. coli* type II  
186 topoisomerases gyrase and topo IV mid-reaction (Drlica, 1999). In dose-response experiments,  
187 we find a tight correlation between cipro antibiotic and mutagenic activities (Figures 1I and S1G,  
188  $r^2 = 0.87, 0.88$ , Pearson correlation), correlating the DSB-induction (antibiotic) activity of cipro with  
189 its role in mutagenesis. Second, we used special *gyrA\** and *parC\** mutants that produce functional  
190 gyrase- and topo IV-mutant proteins that are not bound by cipro (Khodursky et al., 1995), and find  
191 no induction of mutagenesis with cipro (Figure 1J). These data show that cipro action on its target  
192 topoisomerases is needed for induction of mutagenesis, eliminate possible “off-target” effects of  
193 cipro on mutagenesis, and indicate a role for the cipro-induced DSBs in mutagenesis. Finally,  $\sigma^E$   
194 and R-loop-promoting proteins, which promote starvation-stress-induced MBR by promoting  
195 spontaneous DSBs (Gibson et al., 2010; Wimberly et al., 2013) (Figure 1E) are not required for  
196 cipro-induced MBR (Figure S1H), supporting an MBR mechanism like that in starvation, except  
197 with the DSBs resulting from cipro inhibition of topoisomerases, rather than spontaneous sources.  
198 The data indicate that DSBs generated via cipro trigger the MBR pathway.

199 Together, the data support a  $\sigma^S$ -dependent MBR mechanism instigated by cipro-induced  
200 ROS and DSBs, allowing “MBR” to fill the previous mechanism void between ROS and mutations.  
201 The role of ROS might be contributing to the DNA breakage, as ROS do in antibiotic-killing  
202 mechanisms (Foti et al., 2012; Rasouly and Nudler, 2018; Zhao et al., 2015), action after stress-  
203 response induction, as in starvation-stress-induced MBR (Moore et al., 2017), or at another stage.  
204 The data below show a novel role for ROS in mutagenesis as signaling molecules that activate  
205 the general stress response, and, surprisingly, that this is limited to a transiently differentiated cell  
206 subpopulation.

207  
208  
209  
210  
211  
212  
213  
214  
215  
216  
217  
218  
219  
220  
221  
222  
223  
224  
225  
226  
227  
228  
229  
230  
231  
232  
233  
234  
235  
236  
237  
238  
239  
240  
241  
242  
243  
244  
245  
246  
247  
248  
249  
250  
251  
252  
253  
254  
255  
256  
257

## ROS Differentiate a Cell Subpopulation, Activate $\sigma^S$ Response

We surveyed cipro-treated single cells for induction of ROS, and the SOS and  $\sigma^S$  stress responses using flow cytometry. We measured SOS induction using an SOS-response-reporter gene, *P<sub>sulAM</sub>Cherry*, engineered at a non-genic chromosomal site (Nehring et al., 2015; Pennington and Rosenberg, 2007), and found that cipro promotes SOS dose-dependently and uniformly among cells (Figure 2A), with  $208 \pm 26$  times more SOS-positive cells at the 8.5ng/mL mutagenic dose than without cipro (mean  $\pm$  SEM Figure 2A). Auto-fluorescence, which is induced by bactericidal antibiotics (Renggli et al., 2013), is negligible compared with the SOS (or the ROS or  $\sigma^S$ )-activity fluorescence signals (Figures S4B-D).

Surprisingly, low-dose cipro induced both ROS and the  $\sigma^S$  general stress response strongly in only a discreet cell subpopulation(s). In flow-cytometric assays of ROS in log-phase cipro-treated cells using the peroxide ( $H_2O_2$ )-sensitive dye dihydrorhodamine 123 (DHR, Figure 2B), high ROS levels appeared in only in a distinct  $25\% \pm 6\%$  cell subpopulation (8.5ng/mL, Figure 2B, mean  $\pm$  SEM). Similarly, measuring  $\sigma^S$  activity with the *yiaG-yfp* fluorescence reporter (Al Mamun et al., 2012) in log-phase cipro-treated cells also revealed high  $\sigma^S$  activity in a discreet subpopulation of  $22\% \pm 3\%$  of the cells (Figures 2C and S3B, additional controls Figure S3C). For both ROS and the  $\sigma^S$  response, induction occurred above a threshold with low ROS or  $\sigma^S$  activity at doses below the 8.5ng/mL dose at which mutagenesis is assayed (Figure 2B, C). Growth inhibition, a known ROS-dependent process (Kohanski et al., 2007), also occurred above an 8.5ng/ml threshold (Figure S3D). A threshold is also seen in the kinetics of induction of translation of the *rpoS* mRNA (to  $\sigma^S$  protein) by three small RNAs (sRNAs) (Soper et al., 2010), examined below. Thus, despite uniform/unimodal, dose-dependent induction of DSBs (Figure 1G) and SOS (Figure 2A), fluoroquinolone induction of high-ROS and the general stress response occurs in only a well separated subpopulation of  $\sim 20\%$  of exposed log-phase cells, and these have very high ROS and  $\sigma^S$ -activity levels, respectively (Figure 2B, C). The subpopulation is smaller, near 10%, when the cells reach stationary phase (Figure 2D), when mutagenesis is assayed.

We found that ROS are required for, and promote mutagenesis by, activation of the  $\sigma^S$  response. First, ROS scavenging/preventing agents TU or BP blocked induction of  $\sigma^S$ -response activity removing the  $\sigma^S$ -high cell subpopulation (Figures 2D and S3E), reduced the accumulation of  $\sigma^S$ -protein (western blotting, Figure 2E), or of a  $\sigma^S$ - $\beta$ -galactosidase fusion protein (Figure S3F) from an *rpoS-lacZ* reporter, indicating that ROS are required for induction of the  $\sigma^S$  response. Additional controls (Figure S5A and B) show that ROS are not generally needed for fluorescence, transcription, or protein accumulation, just for activation of the  $\sigma^S$  response by cipro. We conclude that  $\sigma^S$ -response induction by cipro requires ROS.

Furthermore, ROS promote cipro-induced MBR not by creation of DSBs, but instead, by induction of the  $\sigma^S$  response in a transiently differentiated cell subpopulation. The role of ROS in antibiotic (growth-inhibitory) activity (Table S1) is creation of DNA breaks via oxidized guanine (8-oxo-dG) in DNA (Dwyer et al., 2007; Foti et al., 2012; Kohanski et al., 2007). By contrast, we observed that reduction of cellular ROS levels with TU or BP, though profoundly inhibitory to the MBR mutagenesis (Figure 1D), did not reduce induction of DSBs by low-dose cipro, quantified as GamGFP foci (same TU and BP concentrations as mutation assays, Figure 2F and S3G). Neither did TU or BP diminish the SOS DNA-damage response (Figure 2G), implying that ROS promote mutagenesis independently of damage to DNA. Moreover, 8-oxo-dG incorporation appears not to be the principal role of ROS in the mutagenesis in that ROS-mediated 8-oxo-dG-signature mutations [ $G \cdot C \rightarrow T \cdot A$  and  $A \cdot T \rightarrow C \cdot G$ , (Schaaper and Dunn, 1987)] are a *less* important part of cipro-induced than spontaneous forward-mutations (*ampD*, Figure S1C). These data indicate that ROS promote mutagenesis other than by promoting DSBs or SOS-responsive DNA damage, or base misincorporation opposite oxidized guanine during DNA replication.

Further, the main or only role of ROS in cipro-induced MBR mutagenesis is  $\sigma^S$  induction,

258 in that artificial/engineered upregulation of  $\sigma^S$  fully substituted for ROS in mutagenesis (Figures  
259 2H and S5C). RifR mutagenesis was restored in the presence of TU by IPTG induction of  $\sigma^S$   
260 (Figures 2H). ROS and the  $\sigma^S$  response also act in the same mutagenesis pathway (Figure S1E).  
261 The data indicate that ROS are needed for MBR only or mostly for induction of  $\sigma^S$ , such that if  $\sigma^S$   
262 is otherwise supplied, ROS are no longer required for the mutagenesis (Figure 2H,I). Importantly,  
263 cipro induction of SOS, ROS, and  $\sigma^S$  activities all require cipro interaction with its topoisomerase  
264 targets, in that cells with active but cipro-non-binding mutant *gyrA\** and *parC\** alleles (Khodursky  
265 et al., 1995) showed no induction of SOS, ROS, or  $\sigma^S$  responses by cipro (Figure S3H-J,  
266 respectively). These data demonstrate that the events that lead to SOS, ROS, and  $\sigma^S$  induction  
267 begin with cipro interaction with its topoisomerase targets.

268 Together, these data show that cipro action on topoisomerases leads to induction of high  
269 ROS levels in a discreet cell subpopulation (Figure 2B), that the ROS activate  $\sigma^S$  in a  
270 subpopulation (Figure 2C-E), and that activation of the  $\sigma^S$  response is how ROS promote cipro-  
271 induced MBR (Figure 2H, I). This constitutes a novel role for ROS in mutagenesis—signaling  
272 induction of the  $\sigma^S$  general stress response—unlike those in antibiotic activity (Dwyer et al., 2007;  
273 Foti et al., 2012; Kohanski et al., 2007) or starvation-stress-induced MBR (Moore et al., 2017).  
274

274

### 275 $\sigma^S$ -active Gambler Cell Subpopulation Generates Mutants

276 We used fluorescence-activated cells sorting (FACS) to demonstrate that the small  $\sigma^S$ -response-  
277 high cell subpopulation, which encompasses 13% ( $\pm 1\%$ ) of the stationary-phase cells used in  
278 mutagenesis assays, produces most cipro-induced mutants (Figure 3). We sorted  $\sigma^S$  high- and  
279 low-activity cells to at least 97% enrichment (Figures S6A-C). Remarkably, whereas unsorted and  
280 mock-sorted cells show (mean)  $25 \pm 3$ -fold induction of RifR mutant frequencies by cipro (Figure  
281 3A), the sorted  $\sigma^S$ -high cells displayed a  $400 \pm 7$ -fold induction of RifR mutagenesis— $16 \pm 3$ -times  
282 higher than unsorted and mock-sorted cells (Figure 3A, controls for the sorted populations Figures  
283 3B, S6D, E, and S7A, B, **Supplemental Discussion S1**). The large  $\sigma^S$ -low-activity cell  
284 subpopulation,  $87\% \pm 1\%$  of cells, showed only  $3 \pm 1$ -fold induction of RifR mutagenesis by cipro,  
285 or  $8 \pm 2$ -times lower than unsorted and mock-sorted cells (Figure 3A), indicating that most mutants  
286 did not arise in the majority cell subpopulation. We can estimate the contribution of each  
287 subpopulation to total yield of mutants as follows. Because the  $\sigma^S$  low-activity cells display only a  
288  $3 \pm 1$ -fold increase in RifR mutants (Figure 3A), we can conclude that the  $\sigma^S$ -low cells produced  
289 about 12% of the mutants ( $3\text{-fold increase} / 25\text{-fold increase in un/mock-sorted} = 12\%$ , Figure 3A).  
290 Because the  $\sigma^S$ -low cells will be contaminated with some  $\sigma^S$ -high cells, this means that *at least*  
291 88% of RifR mutant yield originates in the  $\sigma^S$  high-activity cell subpopulation. The data  
292 demonstrate that most of the cipro-induced RifR mutants originate in the small  $\sigma^S$ -high cell  
293 subpopulation.

294 We excluded the possibility that the greater production of mutants by  $\sigma^S$ -high cells might  
295 result indirectly from their high fluorescence (possible high metabolic activity), using a  
296 fluorescence-reporter gene not controlled by  $\sigma^S$ :  $P_{lac}Cfp$  (cyan fluorescent protein, Figure 3A,  
297 above autofluorescence, Figure S4E). Additional controls for sorted cells' growth rates / colony  
298 formation are shown in Figures S2A,B.

299 Further, we find that the hypermutability of the  $\sigma^S$ -high cell subpopulation that generates  
300 RifR mutants appears to be transient, and not a heritable mutator state, as, for example, a  
301 “mutator” mutation would confer. RifR mutants recovered are not heritably mutator (Figure S5D).

302 Collectively, the data demonstrate that a small, transiently differentiated subpopulation of  
303  $\sigma^S$  high-activity cells is transiently hypermutable and generates most cipro-induced mutants with  
304 de novo rifampicin-(cross)-resistance mutations. These data suggest a potential “bet-hedging”  
305 developmental strategy (Norman et al., 2015; Veening et al., 2008) that may allow evolution while  
306 risking mutagenesis in only some cells; we call these gambler cells. How the gambler cell  
307 subpopulation is differentiated, and a drug that prevents it, follow.  
308

### 309 **FDA-approved Drug Inhibits Evolvability**

310 The  $\sigma^S$ -response high-activity cell subpopulation may be considered a novel therapeutic target  
311 for potential inhibition of cipro-induced mutagenesis to antibiotic cross resistance. We show that  
312 the drug edaravone, an ROS scavenger indicated for human use in ALS in the U.S. and cerebral  
313 infarction in Japan (Miyaji et al., 2015; Watanabe et al., 2018), inhibits cipro induction of  
314 mutagenesis but not its antibiotic (killing) activity. Edaravone, at concentrations seen in new  
315 formulations (100 $\mu$ M) (Corporation, 2014; Li et al., 2012; Parikh et al., 2016), inhibited the  
316 appearance of  $\sigma^S$ -high cells (Figure 3C), accumulation of  $\sigma^S$ -fusion protein (Figure S3F),  
317 appearance of ROS-high cells (Figure 3D), and most (82%  $\pm$  1% of) RifR mutagenesis (Figure  
318 3E). Edaravone did not affect cipro induction of DSBs (Figure 3F), SOS activation (Figure 3G),  
319 cell growth (Figure S2A), colony formation (Figures S2B), or negative-control  $\beta$ -gal activity (Figure  
320 S5B), implying that its inhibition of mutagenesis reflects specific inhibition of  $\sigma^S$ -response  
321 activation (Figure 3I). Importantly, edaravone did not alter the ability of high-dose cipro to kill *E.*  
322 *coli* (Figure 3H), showing that edaravone can reduce mutagenesis induced by cipro without  
323 altering its utility as an antibiotic. These data serve as a proof-of-concept for small-molecule  
324 inhibitors that could be administered with antibiotics to reduce resistance evolution, by impeding  
325 differentiation of  $\sigma^S$ -response-active gambler cells, without harming antibiotic activity. We  
326 explored the basis of differentiation of the  $\sigma^S$  response-high cell subpopulation—how ROS  
327 activate the  $\sigma^S$  response in the subpopulation cells (Figure 3I)—as follows.

328

### 329 **ROS-high Cells Become Gamblers via sRNAs**

330 The ROS-high subpopulation cells could, in principle, induce  $\sigma^S$  activity in other cells, or  
331 themselves, or both. We distinguished these possibilities by following single cells over time  
332 through induction of ROS then the  $\sigma^S$  response, using fluorescence reporters, flow cytometry and  
333 time-lapse microscopy after cipro (Figure 4).

334 We found that ROS-high cells appear before  $\sigma^S$ -active cells. The high-ROS cell  
335 subpopulation is detectable with ROS dye DHR (green) and flow cytometry at 4 hours after cipro  
336 is added, when no  $\sigma^S$  activity from a  $\sigma^S$ -response fluorescence reporter (red) is detectable (4h,  
337 Figure 4A, **Supplemental Discussion S2**). Then, double-positive cells, dyed for ROS (green)  
338 and  $\sigma^S$  activity (red) develop between 8 and 16 hours (Figures 4A and S5E), implying that at least  
339 some  $\sigma^S$ -high cells begin as ROS-high cells. At 24h, the time at which cells were harvested for  
340 sorting (Figure 3A)/mutagenesis assays (Figures 1A,B), many double-positive ROS-/ $\sigma^S$ -high cells  
341 (upper right quadrant, Figure 4A 24h), and also some  $\sigma^S$ -high single-positive cells, were present  
342 (lower right quadrant, Figure 4A 24h). Whether the  $\sigma^S$ -single-positive cells at 24 hours originated  
343 from (had been) ROS-high cells before 24 hours was unclear. We used live-cell imaging with  
344 fluorescence-reporter genes (green) for two different oxidative stress responses, in cells that also  
345 carry the red  $\sigma^S$ -response reporter, to follow individual cells over time from their burst of ROS to  
346  $\sigma^S$ -response induction. The reporters are transcriptional GFP fusions (Zaslaver et al., 2006) for  
347 *oxyR* (peroxide) and *sodA* (superoxide) responses, and both show double-positive and some  $\sigma^S$ -  
348 single-positive cells at 24 hours (Figure 4B, green, the peroxide control discussed **Supplemental**  
349 **Discussion S3**).

350 Using the *sodA* reporter with live-cell time-lapse deconvolution microscopy, we show that  
351 essentially all red  $\sigma^S$ -active cells arose from oxidative-stress-response-activated green cells (>  
352 99%, Figure 4C and Movie S1). Some of the  $\sigma^S$ -response-induced (red) cells showed decreased  
353 ROS (green) after  $\sigma^S$ -response induction (Figure 4C and Movie S1), suggesting amelioration of  
354 high ROS levels by the  $\sigma^S$  response. The data demonstrate that cipro induces MBR by activating  
355 differentiation of a subpopulation of ROS-high cells that become mutable,  $\sigma^S$ -response-high  
356 gamblers that generate most of the antibiotic cross-resistant mutants (Figure 3A).

357 We investigated how ROS activate the  $\sigma^S$  response in subpopulation cells (Figure 5).  $\sigma^S$   
358 is regulated at multiple levels (Battesti et al., 2011) including translational upregulation by small  
359 RNAs (sRNAs). The ArcZ, RprA, and DsrA sRNAs activate  $\sigma^S$  translation assisted by the Hfq



360 RNA chaperone (Battesti et al., 2011). We found that DsrA and ArcZ, but not RprA, are required  
361 for both cipro induction of  $\sigma^S$  protein (Figure 5A), and differentiation of the  $\sigma^S$ -high gambler  
362 subpopulation (Figure 5B). The Hfq RNA chaperone is also required for cipro induction of  $\sigma^S$   
363 protein (Figure 5A),  $\sigma^S$ -response activity (Figure 5B), and RifR mutagenesis (Figure 5C).  
364 Moreover, the requirement for Hfq in RifR mutagenesis can be substituted by artificial  
365 upregulation of  $\sigma^S$  from a plasmid, which restored  $86\% \pm 10\%$  of RifR mutagenesis to  $\Delta hfq$  cells  
366 (Figure 5C, controls Figure S2A,B). The data indicate that the Hfq RNA chaperone promotes cipro  
367 induction of mutagenesis mostly or wholly by promoting  $\sigma^S$ -response induction, presumably via  
368 the ArcZ and DsrA sRNAs. Knock out of *hfq* in  $\Delta arcZ$  or  $\Delta dsrA$  cells causes no further reduction  
369 in  $\sigma^S$ - $\beta$ -galactosidase (Figure 5A), supporting this role of Hfq. Furthermore, we found that cipro  
370 induced *dsrA* and *arcZ* transcription by  $2.3 \pm 0.3$ - and  $53 \pm 3$ -fold, respectively in log phase (Figure  
371 5D), shown with transcriptional *lacZ* fusions to the promoters of the *dsrA* and *arcZ* genes (Mandin  
372 and Gottesman, 2010; Sledjeski et al., 1996); and this transcriptional upregulation was ROS  
373 dependent, and was reduced by ROS reducers TU, BP, and edaravone (Figure 5D). The data  
374 demonstrate that cipro-induced ROS promote transcription of sRNAs DsrA and ArcZ, which, with  
375 RNA chaperone Hfq, upregulate  $\sigma^S$ , activating the general stress response. Thus, these sRNAs  
376 underlie the differentiation of ROS-high cells into the  $\sigma^S$ -active gambler subpopulation (Figure 5E)  
377 that generates antibiotic cross-resistant mutants.

378 There may be an additional component of  $\sigma^S$  upregulation by inhibition of  $\sigma^S$ -protein  
379 degradation. One of the multiple ways that the  $\sigma^S$  response is kept “off” in unstressed cells is via  
380 RssB, which delivers  $\sigma^S$  protein to the ClpXP protease for degradation. Using a *rpoS-lacZ* reporter  
381 that makes a  $\sigma^S$ - $\beta$ -galactosidase fusion protein with an intact RssB-binding region (Zhou and  
382 Gottesman, 2006), we see that deletion of *rssB* increased  $\sigma^S$ - $\beta$ -galactosidase activity in cells  
383 untreated with cipro, but not in cipro-treated cells (Figure 5A), implying that detectable RssB-  
384 mediated  $\sigma^S$  degradation ceases after cipro treatment. The data could mean either that  $\sigma^S$ -protein  
385 degradation may be inhibited by cipro/ROS, or that the upregulation of translation of  $\sigma^S$  by the  
386 DsrA and ArcZ sRNAs might cause saturation of RssB-mediated  $\sigma^S$ -protein degradation.

### 387 388 **ROS Induced via SOS Response and Ubiquinone**

389 Although antibiotics including fluoroquinolones induce ROS in cells (Dwyer et al., 2015), the ROS-  
390 induction pathway is only partly characterized (indicated by a “?” left of ROS in Figure 3I). Our  
391 data above show that cipro interaction with its target topoisomerases (DSB formation) is required  
392 for ROS formation (Figure S3I), that ROS arise in a cell subpopulation (Figure 2B), and previous  
393 work implicated Fenton chemistry and components of electron transfer (Dwyer et al., 2015). We  
394 discovered that the SOS response and ubiquinone oxidoreductase are required for induction of  
395 the ROS-high cell subpopulation by cipro.

396 First, we examined mutagenesis in cells defective for components of three electron-  
397 transfer chain (ETC) protein machines shown to promote the  $\sigma^S$  response during starvation-  
398 stress-induced MBR: NuoC (ubiquinone oxidoreductase I, an ETC “complex I” subunit), UbiD  
399 (biosynthesis of ubiquinone), and CyoD (a subunit of cytochrome bo’ oxidase, an ETC “complex  
400 II” subunit) (Al Mamun et al., 2012). Whereas CyoD and NuoC were not required for RifR or  
401 AmpR mutagenesis, UbiD (ubiquinone) was required for most of both (Figure 6A, controls Figure  
402 S2A,B). Moreover, UbiD (and ubiquinone) appear to act upstream of  $\sigma^S$ -response induction in  
403 mutagenesis, in that artificially induced production of  $\sigma^S$  substituted for UbiD, restoring most or all  
404 of RifR mutagenesis to  $\Delta ubiD$  mutant cells ( $87\% \pm 16\%$  restored, Figure 6B). We observed  
405 reduction of  $\sigma^S$  accumulation and  $\sigma^S$  activity in *ubiD* null-mutant (ubiquinone-deficient) cells  
406 (Figure 6C and 6D), demonstrating that ubiquinone, and by implication, electron transfer, are  
407 required for cipro induction of the  $\sigma^S$  response. By contrast, UbiD/ubiquinone was not required for  
408 SOS-response activity (Figure 6E). Together, the data show that ubiquinone is required for cipro-  
409 induced mutagenesis, which it allows by promoting induction of the  $\sigma^S$  response.

410 We found that the ubiquinone role is specifically in the induction of ROS. Ubiquinone, or

411 coenzyme Q, functions in the aerobic ETC by mediating oxido-reduction cycles required for ATP  
412 energy production (Meganathan and Kwon, 2009). We found that *ubiD*-defective cells showed  
413 severely reduced ROS generation in cipro compared with wild-type cells (32%  $\pm$  9% ROS-high  
414 cells in wild-type, and 8%  $\pm$  4% in *ubiD*-null cells, [Figure 6F](#)). *ubiD*-null-mutant cells also displayed  
415 reduced *katG-lacZ* activity, a reporter activated by H<sub>2</sub>O<sub>2</sub> (Liu and Imlay, 2013) ([Figure 6G](#)). The  
416 data show ubiquinone-promoted induction of ROS, which are required for the cipro induction of  
417 the  $\sigma^S$  response.

418 Perhaps surprisingly, the SOS response is also required for cipro induction of ROS and  
419 the  $\sigma^S$  response. SOS-non-inducible (*lexAind<sup>-</sup>*) cells, and cells lacking RecB, which is required  
420 for SOS induction by DSBs (McPartland et al., 1980), showed reduced induction of ROS ([Figure](#)  
421 [6H](#)) and the  $\sigma^S$  response ([Figure 6I](#)) by cipro, contributing to at least 70%  $\pm$  4% of ROS-high  
422 subpopulation cells ([Figure 6H](#)). Because ubiquinone was not needed for SOS-response  
423 induction by cipro ([Figure 6E](#)), we can infer that SOS acts upstream of, or in parallel with,  
424 ubiquinone in ROS induction ([Figure 6H](#)); not downstream of ubiquinone, which is not needed for  
425 SOS induction ([Figure 6E](#)). The SOS response, induced by UV light, was reported to inhibit  
426 aerobic respiration (Swenson and Schenley, 1974), and, also in assays without cipro, slowing of  
427 respiration increased autoxidation of quinols leading to superoxide production (Gonzalez-Flecha  
428 and Demple, 1995; Skulachev, 1998). Together with our data using cipro, these data support a  
429 model in which SOS activation may inhibit the ETC leading to ROS generation ([Figure 6J](#)). SOS  
430 action upstream of the ubiquinone contribution to ROS generation ([Figure 6J](#)) is harmonious with  
431 our data ([Figure 6E](#)). The data support a model in which the cipro-induced SOS response may  
432 inhibit/slow aerobic respiration, per (Swenson and Schenley, 1974), in only a subpopulation of  
433 cells, allowing autoxidation of ubiquinone to generate high ROS levels in those cells ([Figure 6J](#)).

434

### 435 **Multi-Chromosome Cells Allow Evolvability**

436 When exposed to low-dose cipro, *E. coli* forms long, multi-chromosome cell “filaments” that “bud  
437 off” small, normal-length daughter cells that produce high frequencies of cipro-resistant mutants  
438 (Bos et al., 2015). These data suggested that multi-chromosome cells might promote adaptation  
439 by coupling mutagenesis, which can generate resistance but also deleterious mutations, with  
440 recombination or allele sharing, which might mitigate deleterious effects of many recessive  
441 mutations, allowing the multi-chromosome cell to produce resistant, surviving/adapted progeny  
442 (Bos et al., 2015). We tested directly whether the multi-chromosome state is required for cipro-  
443 induced mutant production, and explored whether it could promote adaptation via mutagenesis.

444 We prevented cipro from inducing multi-chromosome cells by deletion of the *sulA* gene  
445 ([Figure 7](#)), the product of which is induced by SOS and inhibits cell division, causing multi-  
446 chromosome cells during a DNA-damage response (Huisman and D'Ari, 1981). SulA inhibits  
447 polymerization of the microtubule-like “Z-ring”, which pinches off daughter cells (Bi and  
448 Lutkenhaus, 1993). Because SulA does not block DNA replication or elongation of the rod-  
449 shaped *E. coli* cells, cells grow long and “filamentous” or snake-like with multiple chromosomes  
450 in them (Huisman and D'Ari, 1981) when SOS and SulA are induced ([Figure 7A](#) and [B](#)). We used  
451 microscopy and a protein that marks the chromosome as a fluorescent focus ([Figure 7A-C](#)) (Joshi  
452 et al., 2013), to show that  $\Delta$ *sulA* cells do indeed make much shorter cells in low-dose cipro ([Figure](#)  
453 [7D-F](#)), that these have fewer chromosomes per cell ([Figure 7E,F](#)), and are deficient in  
454 mutagenesis ([Figure 7G](#)). Without cipro only 1%  $\pm$  0.7% of exponential wild-type cells have four  
455 or more chromosome copies ([Figure 7C](#)), so we defined a multi-chromosome cell as those with  
456  $\geq 4$  chromosome copies. With cipro, 33%  $\pm$  2% of wild-type cells have  $\geq 4$  chromosome copies  
457 ([Figure 7B](#)). By contrast,  $\Delta$ *sulA* cells show much reduced cell length and chromosome content  
458 ([Figure 7D-F](#)). We find that these  $\Delta$ *sulA* shorter cells show reduced cipro-induced Rif<sup>R</sup> and Amp<sup>R</sup>  
459 mutant production ([Figure 7G](#)), showing 67%  $\pm$  5% and 70%  $\pm$  5% fewer mutants, respectively.  
460 Further, deletion of the *ruvC* HR-repair gene from  $\Delta$ *sulA* mutant cells caused no further decrease  
461 in mutagenesis, indicating that SulA acts in the same HR-dependent MBR mutation pathway as

462 RuvC. Thus, SulA, and the filamented, multi-chromosome state, are required for cipro-induced  
463 MBR.

464 We used mathematical modeling to address the hypothesis of Bos et al. (2015) that multi-  
465 chromosome cell filaments have an advantage over normal cells in adaptation to changing (stress)  
466 environments via mutagenesis. We formulated a mathematical model to test possible benefits of  
467 multi-chromosome cell filaments for rapid adaptation (**Methods**). Results of the model, presented  
468 in [Figure 7H](#), show that increasing filament mutation rate can greatly increase the probability of  
469 both adaptation and survival of a chromosome in multi-chromosome filaments relative to non-  
470 filamented cells. This supports recent work showing that cooperation can accelerate complex  
471 adaptations (Obolski et al., 2017). Further, the advantage of the multi-chromosome state  
472 increases with increasing selection coefficient ([Figure 7H](#)). Selection coefficient represents, for  
473 example, the lethality of cipro in cipro-treated cells, which are under selection for cipro-resistance  
474 mutations. This model demonstrates that the multi-chromosome state is capable of facilitating  
475 adaptation by mutagenesis, illustrated in a model in [Figure 7I](#).

## 476 477 **DISCUSSION**

478  
479 The mechanism of mutagenesis induced by the fluoroquinolone antibiotic cipro, revealed here  
480 (model, [Figure 7I](#)), demonstrates three new biological principles in mutagenesis (three headings  
481 below), and also unites quinolone-induced mutagenesis with a large canon of stress-induced  
482 mutagenesis mechanisms. Stress-induced mutagenesis mechanisms, from bacteria to human,  
483 are defined as mutation-producing mechanisms upregulated by stress responses (Fitzgerald et  
484 al., 2017). Activation of mutagenic DNA break repair (MBR, [Figures 1E-J](#)) by the general stress  
485 response ([Figures 1F, 2C-E, H,I, 4, 5, 7I](#), couples mutagenesis to the  $\sigma^S$  response (Fitzgerald et  
486 al., 2017; Harris et al., 1994; Ponder et al., 2005; Rosenberg et al., 1994) causing mutations  
487 during stress. Fluoroquinolones were not known previously to provoke stress-induced/ $\sigma^S$ -  
488 dependent mutagenesis. Temporal regulation of mutagenesis by stress responses causes mutant  
489 generation preferentially when cells or organisms are maladapted to their environments—when  
490 stressed—potentially accelerating adaptation (Fitzgerald et al., 2017; Ram and Hadany, 2012,  
491 2016).

### 492 493 **A Regulatory Role for ROS in Mutagenesis**

494 We discovered a novel role of ROS in mutagenesis—their activation of the general stress  
495 response ([Figures 2D,E, H, 3C,D, 4, 5](#)), which allows stress-inducible MBR ([Figure 1E,F](#) and  
496 model, [Figure 7I](#)). ROS have long been known to promote mutagenesis by other more direct  
497 mechanisms, including by oxidation of guanines in nucleotide pools and in DNA to 8-oxo-dG. 8-  
498 oxo-dG pairs with A, causing G-to-T and T-to-G (A-to-C) mutations (Schaaper and Dunn, 1987),  
499 a signature that is *less* important for cipro-induced than spontaneous forward mutations (*ampD*,  
500 [Figure S1B,C](#)), indicating a minor role. DNA base mispairs of 8-oxo-dG with A are also attacked  
501 by base-excision repair, which can lead to DNA breaks that are part of various antibiotics' killing  
502 mechanisms (Foti et al., 2012; Kohanski et al., 2007; Rasouly and Nudler, 2018; Zhao et al.,  
503 2015), but we show are not an important source of the DSBs that drive cipro-induced MBR ([Figure](#)  
504 [2F,G](#)). By contrast, we found that, surprisingly, the mutagenic role of ROS can be fully substituted  
505 by engineered production of  $\sigma^S$ , the transcriptional activator (bacterial RNA-polymerase sigma  
506 factor) of the general/starvation stress response ([Figure 2H](#)), indicating that induction of the  $\sigma^S$   
507 response is the predominant or only role of ROS in cipro-induced mutagenesis; if  $\sigma^S$  is supplied  
508 artificially, ROS are no longer needed. We found that ROS induce transcription of ArcZ and DsrA  
509 small RNAs (sRNAs, [Figure 5](#)), which, assisted by the Hfq RNA chaperone ([Figure 5A-C](#)),  
510 promote translation of the *rpoS* mRNA into  $\sigma^S$  protein (Battesti et al., 2011) ([Figure 7I](#)). This differs  
511 from a role of Hfq and another sRNA in mutagenesis via direct downregulation of translation of  
512 an mRNA encoding a mismatch-repair protein (Chen and Gottesman, 2017). We saw that

513 induction of ROS by cipro precedes and is required for  $\sigma^S$ -response activation (Figure 4), and that  
514 cells with high levels of ROS become  $\sigma^S$ -response highly activated cells (Figure 4C, movie S1)  
515 that generate the mutants (Figure 3). These data highlight the centrality of stress-response-control  
516 of mutagenesis, even ROS-induced mutagenesis, and identify ROS as signaling molecules in this  
517 regulation. The DNA crosslinking agent mitomycin C also induces ROS that induce the  $\sigma^S$   
518 response (Dapa et al., 2017), which might occur by similar mechanism with similar mutagenic  
519 consequences as shown here.

520 It is conceivable that several other ROS-promoted mutagenesis mechanisms may involve  
521 ROS upregulation of the general stress response, which can be mutagenic by allowing MBR  
522 (Lombardo et al., 2004; Ponder et al., 2005; Shee et al., 2011), downregulation of mismatch repair  
523 (Gutierrez et al., 2013), transposon movement (Ilves et al., 2001), and possibly other  
524 mechanisms. Because stress-response regulators, such as  $\sigma^S$ , are non-redundant hubs in the  
525 MBR network (Al Mamun et al., 2012), these are attractive candidates for targets of proposed  
526 drugs to slow evolution of pathogens, averting evolution of resistance and evasion of immune  
527 responses (Al Mamun et al., 2012; Fitzgerald et al., 2017; Rosenberg and Queitsch, 2014).  
528 Moreover, the FDA-approved antioxidant drug edaravone behaved as such an “anti-evolvability”  
529 drug in our experiments (Figure 3C-E) and did so without reducing the killing power of cipro as an  
530 antibiotic (Figure 3H), providing a promising proof-of-concept. Reactive oxygen affects many  
531 aspects of the biology of cells from lipid and protein oxidation (Pradenas et al., 2012; Tamarit et  
532 al., 1998) to DNA damage and mutagenesis (reviewed above). The addition of stress-response  
533 activation causing MBR to this list identifies ROS as evolution-promoting signaling molecules.

534

### 535 **Mutagenesis in Transiently Differentiated Gamblers**

536 Our data reveal that ROS, and then the general stress response, are induced strongly in a 10-  
537 20% subpopulation of cipro-treated cells (Figures 2B-D and 4) that is transiently differentiated into  
538 a mutable state (Figure S5D), and produces most of the mutants (Figure 3A,C). Transient  
539 differentiation in bacterial subpopulations is a recognized potential evolutionary “bet-hedging”  
540 strategy, in which only some cells take the risk of “trying” a phenotype that may be advantageous  
541 in some environments and maladaptive in others (Norman et al., 2015; Veening et al., 2008).  
542 Transient phenotype examples include the persister state, which allows tolerance of lethal drugs  
543 but slows or halts proliferation (Balaban et al., 2004), competence for “natural transformation”—  
544 DNA uptake and incorporation into the genome (Chen and Dubnau, 2004), sporulation—a  
545 dormant but environmentally resistant state (Norman et al., 2015), and even programmed cell  
546 death (Amitai et al., 2009; Gonzalez-Pastor et al., 2003), hypothesized (Amitai et al., 2009;  
547 Rosenberg, 2009) or demonstrated (Gonzalez-Pastor et al., 2003) to benefit siblings of the  
548 sacrificed cells. The regulated/“programmed” limitation of mutagenesis itself—a major  
549 evolutionary driver—to a cell subpopulation appears to embed the apparent evolutionary strategy  
550 of environmentally tuned mutagenesis within another evolutionary strategy: “bet hedging”  
551 (Norman et al., 2015; Torkelson et al., 1997; Veening et al., 2008). Though transiently  
552 hypermutable cell subpopulations have been hypothesized (Hall, 1990; Ninio, 1991), supported  
553 by genetic evidence (Torkelson et al., 1997), and cells with stress responses linked to  
554 mutagenesis of unknown mechanism (Woo et al., 2018), our data provide the first isolation (Figure  
555 3) of a hypermutable cell subpopulation in the act of mutagenesis, and show the defining,  
556 differentiating inputs: ROS and general stress-response activation (Figures 3 and 4) as well as  
557 the mutagenesis mechanism: MBR, illustrated in Figure 7I. We found that the subpopulation is  
558 relatively large at 10-20%, and that its transient differentiation (Figure S5D) is achieved by stress-  
559 response activation in the subpopulation cells, cell autonomously (Figure 4)—all novel  
560 mechanisms of potential means of promotion of the ability to evolve. Unlike “persisters,” these  
561 cells take the risk of inducing mutations, which can lead to heritable resistance to never-before-  
562 encountered antibiotics, and so could be called “gamblers.”

563

## 564 **Multi-chromosome Cells Promote Evolvability**

565 We found that the multi-chromosome state, caused by the SOS-response-induced SulaA inhibitor  
566 of cell division (Huisman and D'Ari, 1981), is required for cipro-induced mutagenesis (Figure 7).  
567 We observed SOS-dependent multi-chromosome cell “filaments” previously during low-dose cipro  
568 exposure and noted their “budding” off of small cells that produce high frequencies of cipro-  
569 resistant mutants (Bos et al., 2015). Here, we showed that “filamentation” is required for mutant  
570 production (Figure 7A-G). For cipro-induced mutagenesis by mutagenic repair of DNA double-  
571 strand breaks (Figure 1E,F), induced here by cipro (Figure 1G-J, 2F and S1G), more than one  
572 chromosome is needed for DSB repair. Our modeling indicates that the multiple chromosomes  
573 may additionally facilitate survival and adaptation to stresses of highly mutating cells by  
574 cooperation (Obolski et al., 2017): sharing of gene products and/or alleles (recombination)  
575 between the chromosomes, masking deleterious recessive phenotypes (Figure 7H). Our data  
576 imply that “filamenting” cells may be biomarkers of rapid evolution. Bacteria like *Bacillus subtilis*  
577 undergo natural transformation—acquiring sibling cells’ DNA—simultaneously with, and activated  
578 by same Com stress response that upregulates a stress-induced mutagenesis mechanism (Sung  
579 and Yasbin, 2002). Thus, *B. subtilis* engages the adaptation-boosting combination of  
580 recombination and mutagenesis (Lenhart et al., 2012). Our data indicate that *E. coli*, which is  
581 famously incapable of natural transformation, may employ the same adaptation-accelerating  
582 strategy via multiple sibling chromosomes within one cell, rather than sibling DNA taken up  
583 exogenously. The data suggest that in addition to targeting stress-response regulators as an anti-  
584 evolvability drug strategy (Al Mamun et al., 2012; Fitzgerald et al., 2017; Rosenberg and Queitsch,  
585 2014) and Figure 3C-H, dividing (and conquering) the multiple chromosomes might also prove to  
586 be an effective anti-evolvability, anti-pathogen therapeutic strategy.

587  
588

## 589 **AUTHOR CONTRIBUTIONS**

590 JPP, LGV, OL-E, JB, RHA, CH, LH, and SMR conceived the project, advanced hypotheses and/or  
591 designed experimental approaches; JPP, LGV, YZ, AW, JL, JX, QM performed or guided the work;  
592 DB provided advice/assistance, JPP, PH and SMR wrote the manuscript.

593

## 594 **ACKNOWLEDGEMENTS**

595 We thank S Gottesman, J Imlay, I Matic, and L Zechiedrich for kind gifts of *E. coli* strains, N  
596 Majdalani for guidance on sRNAs and  $\sigma^S$  activation, S Kozmin for advice on dose-dependent  
597 induction of mutagenesis, S Henikoff for helpful conversation, and KM Miller, and Meng Wang for  
598 improving the manuscript. This work was supported by the NIH Grants R35-GM122598 (SMR),  
599 R01-GM088653 (CH), R01-GM102679 (DB), R01-GM106373 (PJH), the Israeli Science Fund  
600 ISF 1568/13 (LH), and by the Integrated Microscopy Core at Baylor College of Medicine with  
601 funding from the NIH (DK56338, and CA125123), the Dan L. Duncan Comprehensive Cancer  
602 Center, RP160283 Baylor College of Medicine Comprehensive Cancer Training Program  
603 Postdoctoral Fellowship (DMF) and American Cancer Society Postdoctoral Fellowship 132206-  
604 PF-18-035-01-DMC (DMF); and the John S. Dunn Gulf Coast Consortium for Chemical  
605 Genomics. This project was supported by the Cytometry and Cell Sorting Core at Baylor College  
606 of Medicine with funding from the NIH (P30 AI036211, P30 CA125123, and S10 RR024574) and  
607 the expert assistance of Joel M. Sederstrom.

608

## 609 **REFERENCES**

- 610 Al Mamun, A.A.M., Lombardo, M.-J., Shee, C., Lisewski, A.M., Gonzalez, C., Lin, D., Nehring,  
611 R.B., Saint-Ruf, C., Gibson, J.L., Frisch, R.L., *et al.* (2012). Identity and function of a large gene  
612 network underlying mutagenic repair of DNA breaks. *Science (New York, NY)* 338, 1344-1348.
- 613 Amitai, S., Kolodkin-Gal, I., Hananya-Meltabashi, M., Sacher, A., and Engelberg-Kulka, H.  
614 (2009). *Escherichia coli* MazF leads to the simultaneous selective synthesis of both "death  
615 proteins" and "survival proteins". *PLoS Genet* 5, e1000390.
- 616 Balaban, N.Q., Merrin, J., Chait, R., Kowalik, L., and Leibler, S. (2004). Bacterial persistence as  
617 a phenotypic switch. *Science* 305, 1622-1625.
- 618 Barreto, B., Rogers, E., Xia, J., Frisch, R.L., Richters, M., Fitzgerald, D.M., and Rosenberg,  
619 S.M. (2016). The Small RNA GcvB Promotes Mutagenic Break Repair by Opposing the  
620 Membrane Stress Response. *J Bacteriol* 198, 3296-3308.
- 621 Battesti, A., Majdalani, N., and Gottesman, S. (2011). The RpoS-mediated general stress  
622 response in *Escherichia coli*. *Annual review of microbiology* 65, 189-213.
- 623 Bi, E., and Lutkenhaus, J. (1993). Cell division inhibitors SulA and MinCD prevent formation of  
624 the FtsZ ring. *Journal of bacteriology* 175, 1118-1125.
- 625 Blair, J.M.A., Webber, M.A., Baylay, A.J., Ogbolu, D.O., and Piddock, L.J.V. (2014). Molecular  
626 mechanisms of antibiotic resistance. *Nature Reviews Microbiology* 13, 42-51.
- 627 Bos, J., Zhang, Q., Vyawahare, S., Rogers, E., Rosenberg, S.M., and Austin, R.H. (2015).  
628 Emergence of antibiotic resistance from multinucleated bacterial filaments. *Proc Natl Acad Sci U*  
629 *S A* 112, 178-183.
- 630 Cannatelli, A., Giani, T., D'Andrea, M.M., Di Pilato, V., Arena, F., Conte, V., Tryfinopoulou, K.,  
631 Vatopoulos, A., Rossolini, G.M., and Group, C.S. (2014). MgrB inactivation is a common  
632 mechanism of colistin resistance in KPC-producing *Klebsiella pneumoniae* of clinical origin.  
633 *Antimicrob Agents Chemother* 58, 5696-5703.
- 634 Chen, I., and Dubnau, D. (2004). DNA uptake during bacterial transformation. *Nat Rev Microbiol*  
635 2, 241-249.
- 636 Chen, J., and Gottesman, S. (2017). Hfq links translation repression to stress-induced  
637 mutagenesis in *E. coli*. *Genes Dev* 31, 1382-1395.
- 638 Cirz, R.T., Chin, J.K., Andes, D.R., de Crécy-Lagard, V., Craig, W.A., and Romesberg, F.E.  
639 (2005). Inhibition of mutation and combating the evolution of antibiotic resistance. *PLoS biology*  
640 3, e176.
- 641 Corporation, M.T.P. (2014). Safety and Pharmacokinetics of MCI-186 in Subjects With Acute  
642 Ischemic Stroke, pp. The objectives of this study are to assess the safety, tolerability and local  
643 tolerance, and to investigate the plasma levels and terminal elimination half life of MCI-186, and

- 644 to review the routine clinical and neurological assessments data of MCI-186 in subjects with  
645 acute ischemic stroke.
- 646 Dapa, T., Fleurier, S., Bredeche, M.F., and Matic, I. (2017). The SOS and RpoS Regulons  
647 Contribute to Bacterial Cell Robustness to Genotoxic Stress by Synergistically Regulating DNA  
648 Polymerase Pol II. *Genetics* 206, 1349-1360.
- 649 Dorr, T., Lewis, K., and Vulic, M. (2009). SOS response induces persistence to fluoroquinolones  
650 in *Escherichia coli*. *PLoS Genet* 5, e1000760.
- 651 Drlica, K. (1999). Mechanism of fluoroquinolone action. *Curr Opin Microbiol* 2, 504-508.
- 652 Dwyer, D.J., Collins, J.J., and Walker, G.C. (2015). Unraveling the physiological complexities of  
653 antibiotic lethality. *Annual review of pharmacology and toxicology* 55, 313-332.
- 654 Dwyer, D.J., Kohanski, M.A., Hayete, B., and Collins, J.J. (2007). Gyrase inhibitors induce an  
655 oxidative damage cellular death pathway in *Escherichia coli*. *Mol Syst Biol* 3, 91.
- 656 Fitzgerald, D.M., Hastings, P.J., and Rosenberg, S.M. (2017). Stress-Induced Mutagenesis:  
657 Implications in Cancer and Drug Resistance. *Annual Review of Cancer Biology* 1, annurev-  
658 cancerbio-050216-121919 [Epub ahead of pri.
- 659 Foti, J.J., Devadoss, B., Winkler, J.A., Collins, J.J., and Walker, G.C. (2012). Oxidation of the  
660 guanine nucleotide pool underlies cell death by bactericidal antibiotics. *Science (New York, NY)*  
661 336, 315-319.
- 662 Frenoy, A., and Bonhoeffer, S. (2018). Death and population dynamics affect mutation rate  
663 estimates and evolvability under stress in bacteria. *PLoS Biol* 16, e2005056.
- 664 Frisch, R.L., Su, Y., Thornton, P.C., Gibson, J.L., Rosenberg, S.M., and Hastings, P.J. (2010).  
665 Separate DNA Pol II- and Pol IV-dependent pathways of stress-induced mutation during double-  
666 strand-break repair in *Escherichia coli* are controlled by RpoS. *Journal of bacteriology* 192,  
667 4694-4700.
- 668 Galhardo, R.S., Do, R., Yamada, M., Friedberg, E.C., Hastings, P.J., Nohmi, T., and  
669 Rosenberg, S.M. (2009). DinB upregulation is the sole role of the SOS response in stress-  
670 induced mutagenesis in *Escherichia coli*. *Genetics* 182, 55-68.
- 671 Gibson, J.L., Lombardo, M.-J., Thornton, P.C., Hu, K.H., Galhardo, R.S., Beadle, B., Habib, A.,  
672 Magner, D.B., Frost, L.S., Herman, C., *et al.* (2010). The sigma(E) stress response is required  
673 for stress-induced mutation and amplification in *Escherichia coli*. *Molecular microbiology* 77,  
674 415-430.
- 675 Gonzalez-Flecha, B., and Demple, B. (1995). Metabolic sources of hydrogen peroxide in  
676 aerobically growing *Escherichia coli*. *J Biol Chem* 270, 13681-13687.

- 677 Gonzalez-Pastor, J.E., Hobbs, E.C., and Losick, R. (2003). Cannibalism by sporulating bacteria.  
678 *Science* 301, 510-513.
- 679 Gutierrez, A., Laureti, L., Crussard, S., Abida, H., Rodríguez-Rojas, A., Blázquez, J., Baharoglu,  
680 Z., Mazel, D., Darfeuille, F., Vogel, J., *et al.* (2013).  $\beta$ -Lactam antibiotics promote bacterial  
681 mutagenesis via an RpoS-mediated reduction in replication fidelity. *Nature communications* 4,  
682 1610.
- 683 Hadany, L., and Beker, T. (2003a). Fitness-associated recombination on rugged adaptive  
684 landscapes. *J Evol Biol* 16, 862-870.
- 685 Hadany, L., and Beker, T. (2003b). On the evolutionary advantage of fitness-associated  
686 recombination. *Genetics* 165, 2167-2179.
- 687 Hall, B.G. (1990). Spontaneous point mutations that occur more often when advantageous than  
688 when neutral. *Genetics* 126, 5-16.
- 689 Harris, R.S., Longrich, S., and Rosenberg, S.M. (1994). Recombination in adaptive mutation.  
690 *Science (New York, NY)* 264, 258-260.
- 691 Hicks, L.A., Bartoces, M.G., Roberts, R.M., Suda, K.J., Hunkler, R.J., Taylor, T.H., and Schrag,  
692 S.J. (2015). US Outpatient Antibiotic Prescribing Variation According to Geography, Patient  
693 Population, and Provider Specialty in 2011. *Clinical Infectious Diseases* 60, 1308-1316.
- 694 Huisman, O., and D'Ari, R. (1981). An inducible DNA replication-cell division coupling  
695 mechanism in *E. coli*. *Nature* 290, 797-799.
- 696 Ilves, H., Horak, R., and Kivisaar, M. (2001). Involvement of sigma(S) in starvation-induced  
697 transposition of *Pseudomonas putida* transposon Tn4652. *J Bacteriol* 183, 5445-5448.
- 698 Iwase, T., Tajima, A., Sugimoto, S., Okuda, K.-i., Hironaka, I., Kamata, Y., Takada, K., and  
699 Mizunoe, Y. (2013). A simple assay for measuring catalase activity: a visual approach. *Scientific*  
700 *reports* 3, 3081.
- 701 Jacoby, G.A. (2005). Mechanisms of resistance to quinolones. *Clinical infectious diseases : an*  
702 *official publication of the Infectious Diseases Society of America* 41 *Suppl* 2, S120-126.
- 703 Joshi, M.C., Magnan, D., Montminy, T.P., Lies, M., Stepankiw, N., and Bates, D. (2013).  
704 Regulation of sister chromosome cohesion by the replication fork tracking protein SeqA. *PLoS*  
705 *Genet* 9, e1003673.
- 706 Khodursky, A.B., Zechiedrich, E.L., and Cozzarelli, N.R. (1995). Topoisomerase IV is a target of  
707 quinolones in *Escherichia coli*. *Proc Natl Acad Sci U S A* 92, 11801-11805.



- 708 Kohanski, M.A., DePristo, M.A., and Collins, J.J. (2010). Sublethal antibiotic treatment leads to  
709 multidrug resistance via radical-induced mutagenesis. *Molecular cell* 37, 311-320.
- 710 Kohanski, M.A., Dwyer, D.J., Hayete, B., Lawrence, C.A., and Collins, J.J. (2007). A common  
711 mechanism of cellular death induced by bactericidal antibiotics. *Cell* 130, 797-810.
- 712 Kuzminov, A. (1999). Recombinational repair of DNA damage in *Escherichia coli* and  
713 bacteriophage lambda. *Microbiol Mol Biol Rev* 63, 751-813, table of contents.
- 714 Layton, J.C., and Foster, P.L. (2003). Error-prone DNA polymerase IV is controlled by the  
715 stress-response sigma factor, RpoS, in *Escherichia coli*. *Molecular microbiology* 50, 549-561.
- 716 Lenhart, J.S., Schroeder, J.W., Walsh, B.W., and Simmons, L.A. (2012). DNA repair and  
717 genome maintenance in *Bacillus subtilis*. *Microbiol Mol Biol Rev* 76, 530-564.
- 718 Lewis, K. (2010). Persister cells. *Annu Rev Microbiol* 64, 357-372.
- 719 Li, H., Xu, K., Wang, Y., Zhang, H., Li, T., Meng, L., Gong, X., Zhang, H., Ou, N., and Ruan, J.  
720 (2012). Phase I clinical study of edaravone in healthy Chinese volunteers: safety and  
721 pharmacokinetics of single or multiple intravenous infusions. *Drugs R D* 12, 65-70.
- 722 Liu, Y., and Imlay, J.A. (2013). Cell death from antibiotics without the involvement of reactive  
723 oxygen species. *Science* 339, 1210-1213.
- 724 Lombardo, M.-J., Aponyi, I., and Rosenberg, S.M. (2004). General stress response regulator  
725 RpoS in adaptive mutation and amplification in *Escherichia coli*. *Genetics* 166, 669-680.
- 726 Lorian, V., and De Freitas, C.C. (1979). Minimal antibiotic concentrations of aminoglycosides  
727 and beta-lactam antibiotics for some gram-negative bacilli and gram-positive cocci. *J Infect Dis*  
728 139, 599-603.
- 729 Magrini, E.T.N. (2017). GLOBAL PRIORITY LIST OF ANTIBIOTIC-RESISTANT BACTERIA TO  
730 GUIDE RESEARCH, DISCOVERY, AND DEVELOPMENT OF NEW ANTIBIOTICS. In *Essential*  
731 *medicines and health products* (World Health Organization: World Health Organization), pp. 1-7.
- 732 Mandin, P., and Gottesman, S. (2010). Integrating anaerobic/aerobic sensing and the general  
733 stress response through the ArcZ small RNA. *The EMBO journal* 29, 3094-3107.
- 734 McPartland, A., Green, L., and Echols, H. (1980). Control of recA gene RNA in *E. coli*:  
735 regulatory and signal genes. *Cell* 20, 731-737.
- 736 Meganathan, R., and Kwon, O. (2009). Biosynthesis of Menaquinone (Vitamin K2) and  
737 Ubiquinone (Coenzyme Q). *EcoSal Plus* 3.

- 738 Mello Filho, A.C., Hoffmann, M.E., and Meneghini, R. (1984). Cell killing and DNA damage by  
739 hydrogen peroxide are mediated by intracellular iron. *Biochem J* 218, 273-275.
- 740 Miller, J.H. (1992). *A Short Course in Bacterial Genetics: A laboratory*  
741 *Manual and Handbook for Escherichia coli and Related Bacteria* (Cold Spring Harbor, NY: Cold  
742 Spring Harbor Laboratory Press).
- 743 Miyaji, Y., Yoshimura, S., Sakai, N., Yamagami, H., Egashira, Y., Shirakawa, M., Uchida, K.,  
744 Kageyama, H., and Tomogane, Y. (2015). Effect of edaravone on favorable outcome in patients  
745 with acute cerebral large vessel occlusion: subanalysis of RESCUE-Japan Registry. *Neurol Med*  
746 *Chir (Tokyo)* 55, 241-247.
- 747 Moore, J.M., Correa, R., Rosenberg, S.M., and Hastings, P.J. (2017). Persistent damaged  
748 bases in DNA allow mutagenic break repair in *Escherichia coli*. *PLoS Genet* 13, e1006733.
- 749 Nehring, R.B., Gu, F., Lin, H.-Y., Gibson, J.L., Blythe, M.J., Wilson, R., Bravo Núñez, M.A.,  
750 Hastings, P.J., Louis, E.J., Frisch, R.L., *et al.* (2015). An ultra-dense library resource for rapid  
751 deconvolution of mutations that cause phenotypes in *Escherichia coli*. *Nucleic acids research*  
752 44, e41.
- 753 Ninio, J. (1991). Transient mutators: a semiquantitative analysis of the influence of translation  
754 and transcription errors on mutation rates. *Genetics* 129, 957-962.
- 755 Norman, T.M., Lord, N.D., Paulsson, J., and Losick, R. (2015). Stochastic Switching of Cell Fate  
756 in Microbes. *Annu Rev Microbiol* 69, 381-403.
- 757 O'Neill, J. (2014). Review on Antimicrobial Resistance Antimicrobial Resistance: Tackling a  
758 crisis for the health and wealth of nations. London: Review on Antimicrobial Resistance.  
759 Available from: [https://amr-review.org/sites/default/files/AMR\\_Review\\_Paper\\_-\\_Tackling\\_a\\_crisis](https://amr-review.org/sites/default/files/AMR_Review_Paper_-_Tackling_a_crisis_for_the_health_and_wealth_of_nations_1.pdf)  
760 [for the health and wealth of nations\\_1.pdf](https://amr-review.org/sites/default/files/AMR_Review_Paper_-_Tackling_a_crisis_for_the_health_and_wealth_of_nations_1.pdf).
- 761 Obolski, U., Ram, Y., and Hadany, L. (2017). Evolution on rugged adaptive landscapes. *Rep*  
762 *Prog Phys*.
- 763 Palmer, K.L., Daniel, A., Hardy, C., Silverman, J., and Gilmore, M.S. (2011). Genetic basis for  
764 daptomycin resistance in enterococci. *Antimicrob Agents Chemother* 55, 3345-3356.
- 765 Parikh, A., Kathawala, K., Tan, C.C., Garg, S., and Zhou, X.F. (2016). Development of a novel  
766 oral delivery system of edaravone for enhancing bioavailability. *Int J Pharm* 515, 490-500.
- 767 Pennington, J.M., and Rosenberg, S.M. (2007). Spontaneous DNA breakage in single living  
768 *Escherichia coli* cells. *Nature genetics* 39, 797-802.

- 769 Petrosino, J.F., Pendleton, A.R., Weiner, J.H., and Rosenberg, S.M. (2002). Chromosomal  
770 system for studying AmpC-mediated beta-lactam resistance mutation in *Escherichia coli*.  
771 *Antimicrobial agents and chemotherapy* 46, 1535-1539.
- 772 Ponder, R.G., Fonville, N.C., and Rosenberg, S.M. (2005). A switch from high-fidelity to error-  
773 prone DNA double-strand break repair underlies stress-induced mutation. *Molecular cell* 19,  
774 791-804.
- 775 Pradenas, G.A., Paillavil, B.A., Reyes-Cerpa, S., Perez-Donoso, J.M., and Vasquez, C.C.  
776 (2012). Reduction of the monounsaturated fatty acid content of *Escherichia coli* results in  
777 increased resistance to oxidative damage. *Microbiology* 158, 1279-1283.
- 778 Radzikowski, J.L., Vedelaar, S., Siegel, D., Ortega, A.D., Schmidt, A., and Heinemann, M.  
779 (2016). Bacterial persistence is an active sigmaS stress response to metabolic flux limitation.  
780 *Mol Syst Biol* 12, 882.
- 781 Ram, Y., and Hadany, L. (2012). The evolution of stress-induced hypermutation in asexual  
782 populations. *Evolution* 66, 2315-2328.
- 783 Ram, Y., and Hadany, L. (2016). Condition-dependent sex: who does it, when and why? *Philos*  
784 *Trans R Soc Lond B Biol Sci* 371.
- 785 Rasouly, A., and Nudler, E. (2018). Antibiotic killing through oxidized nucleotides. *Proc Natl*  
786 *Acad Sci U S A*.
- 787 Renggli, S., Keck, W., Jenal, U., and Ritz, D. (2013). Role of autofluorescence in flow cytometric  
788 analysis of *Escherichia coli* treated with bactericidal antibiotics. *J Bacteriol* 195, 4067-4073.
- 789 Reynolds, M.G. (2000). Compensatory evolution in rifampin-resistant *Escherichia coli*. *Genetics*  
790 156, 1471-1481.
- 791 Rosenberg, S.M. (2009). Life, death, differentiation, and the multicellularity of bacteria. *PLoS*  
792 *genetics* 5, e1000418.
- 793 Rosenberg, S.M., Longerich, S., Gee, P., and Harris, R.S. (1994). Adaptive mutation by  
794 deletions in small mononucleotide repeats. *Science (New York, NY)* 265, 405-407.
- 795 Rosenberg, S.M., and Queitsch, C. (2014). Medicine. Combating evolution to fight disease.  
796 *Science (New York, NY)* 343, 1088-1089.
- 797 Saka, K., Tadenuma, M., Nakade, S., Tanaka, N., Sugawara, H., Nishikawa, K., Ichiyoshi, N.,  
798 Kitagawa, M., Mori, H., Ogasawara, N., *et al.* (2005). A complete set of *Escherichia coli* open  
799 reading frames in mobile plasmids facilitating genetic studies. *DNA Res* 12, 63-68.

- 800 Schaaper, R.M., and Dunn, R.L. (1987). Escherichia coli mutT mutator effect during in vitro DNA  
801 synthesis. Enhanced A.G replicational errors. J Biol Chem 262, 16267-16270.
- 802 Shee, C., Cox, B.D., Gu, F., Luengas, E.M., Joshi, M.C., Chiu, L.-Y., Magnan, D., Halliday, J.A.,  
803 Frisch, R.L., Gibson, J.L., *et al.* (2013). Engineered proteins detect spontaneous DNA breakage  
804 in human and bacterial cells. eLife 2, e01222.
- 805 Shee, C., Gibson, J.L., Darrow, M.C., Gonzalez, C., and Rosenberg, S.M. (2011). Impact of a  
806 stress-inducible switch to mutagenic repair of DNA breaks on mutation in Escherichia coli.  
807 Proceedings of the National Academy of Sciences of the United States of America 108, 13659-  
808 13664.
- 809 Shee, C., Gibson, J.L., and Rosenberg, S.M. (2012). Two mechanisms produce mutation  
810 hotspots at DNA breaks in Escherichia coli. Cell reports 2, 714-721.
- 811 Skulachev, V.P. (1998). Uncoupling: new approaches to an old problem of bioenergetics.  
812 Biochim Biophys Acta 1363, 100-124.
- 813 Sledjeski, D.D., Gupta, A., and Gottesman, S. (1996). The small RNA, DsrA, is essential for the  
814 low temperature expression of RpoS during exponential growth in Escherichia coli. EMBO J 15,  
815 3993-4000.
- 816 Soper, T., Mandin, P., Majdalani, N., Gottesman, S., and Woodson, S.A. (2010). Positive  
817 regulation by small RNAs and the role of Hfq. Proceedings of the National Academy of Sciences  
818 107, 9602-9607.
- 819 Sung, H.M., and Yasbin, R.E. (2002). Adaptive, or stationary-phase, mutagenesis, a component  
820 of bacterial differentiation in Bacillus subtilis. J Bacteriol 184, 5641-5653.
- 821 Swenson, P.A., and Schenley, R.L. (1974). Respiration, growth and viability of repair-deficient  
822 mutants of Escherichia coli after ultraviolet irradiation. Int J Radiat Biol Relat Stud Phys Chem  
823 Med 25, 51-60.
- 824 Tamarit, J., Cabisco, E., and Ros, J. (1998). Identification of the major oxidatively damaged  
825 proteins in Escherichia coli cells exposed to oxidative stress. J Biol Chem 273, 3027-3032.
- 826 Torkelson, J., Harris, R.S., Lombardo, M.J., Nagendran, J., Thulin, C., and Rosenberg, S.M.  
827 (1997). Genome-wide hypermutation in a subpopulation of stationary-phase cells underlies  
828 recombination-dependent adaptive mutation. The EMBO journal 16, 3303-3311.
- 829 Veening, J.W., Smits, W.K., and Kuipers, O.P. (2008). Bistability, epigenetics, and bet-hedging  
830 in bacteria. Annu Rev Microbiol 62, 193-210.
- 831 Wasil, M., Halliwell, B., Grootveld, M., Moorhouse, C.P., Hutchison, D.C., and Baum, H. (1987).  
832 The specificity of thiourea, dimethylthiourea and dimethyl sulphoxide as scavengers of hydroxyl

- 833 radicals. Their protection of alpha 1-antiproteinase against inactivation by hypochlorous acid.  
834 The Biochemical journal 243, 867-870.
- 835 Wassarman, K.M., Repoila, F., Rosenow, C., Storz, G., and Gottesman, S. (2001). Identification  
836 of novel small RNAs using comparative genomics and microarrays. *Genes Dev* 15, 1637-1651.
- 837 Watanabe, K., Tanaka, M., Yuki, S., Hirai, M., and Yamamoto, Y. (2018). How is edaravone  
838 effective against acute ischemic stroke and amyotrophic lateral sclerosis? *J Clin Biochem Nutr*  
839 62, 20-38.
- 840 Wimberly, H., Shee, C., Thornton, P.C., Sivaramakrishnan, P., Rosenberg, S.M., and Hastings,  
841 P.J. (2013). R-loops and nicks initiate DNA breakage and genome instability in non-growing  
842 *Escherichia coli*. *Nature communications* 4, 2115.
- 843 Woo, A.C., Faure, L., Dapa, T., and Matic, I. (2018). Heterogeneity of spontaneous DNA  
844 replication errors in single isogenic *Escherichia coli* cells. *Sci Adv* 4, eaat1608.
- 845 Xia, J., Chen, L.T., Mei, Q., Ma, C.H., Halliday, J.A., Lin, H.Y., Magnan, D., Pribis, J.P.,  
846 Fitzgerald, D.M., Hamilton, H.M., *et al.* (2016). Holliday junction trap shows how cells use  
847 recombination and a junction-guardian role of RecQ helicase. *Sci Adv* 2, e1601605.
- 848 Xia, J., Chiu, L.-Y., Nehring, R.B., Bravo Nunez, M.A., Mei, Q., Perez, M., Zhai, Y., Fitzgerald,  
849 D., Pribis, J.P., Wang, Y., *et al.* (2018). Bacteria-to-human protein networks reveal origins of  
850 endogenous DNA damage. *bioRxiv*, doi: 10.1101/354589.
- 851 Zaslaver, A., Bren, A., Ronen, M., Itzkovitz, S., Kikoin, I., Shavit, S., Liebermeister, W., Surette,  
852 M.G., and Alon, U. (2006). A comprehensive library of fluorescent transcriptional reporters for  
853 *Escherichia coli*. *Nat Methods* 3, 623-628.
- 854 Zhang, A., Altuvia, S., Tiwari, A., Argaman, L., Hengge-Aronis, R., and Storz, G. (1998). The  
855 OxyS regulatory RNA represses rpoS translation and binds the Hfq (HF-I) protein. *EMBO J* 17,  
856 6061-6068.
- 857 Zhao, X., Hong, Y., and Drlica, K. (2015). Moving forward with reactive oxygen species  
858 involvement in antimicrobial lethality. *Journal of Antimicrobial Chemotherapy* 70, 639.

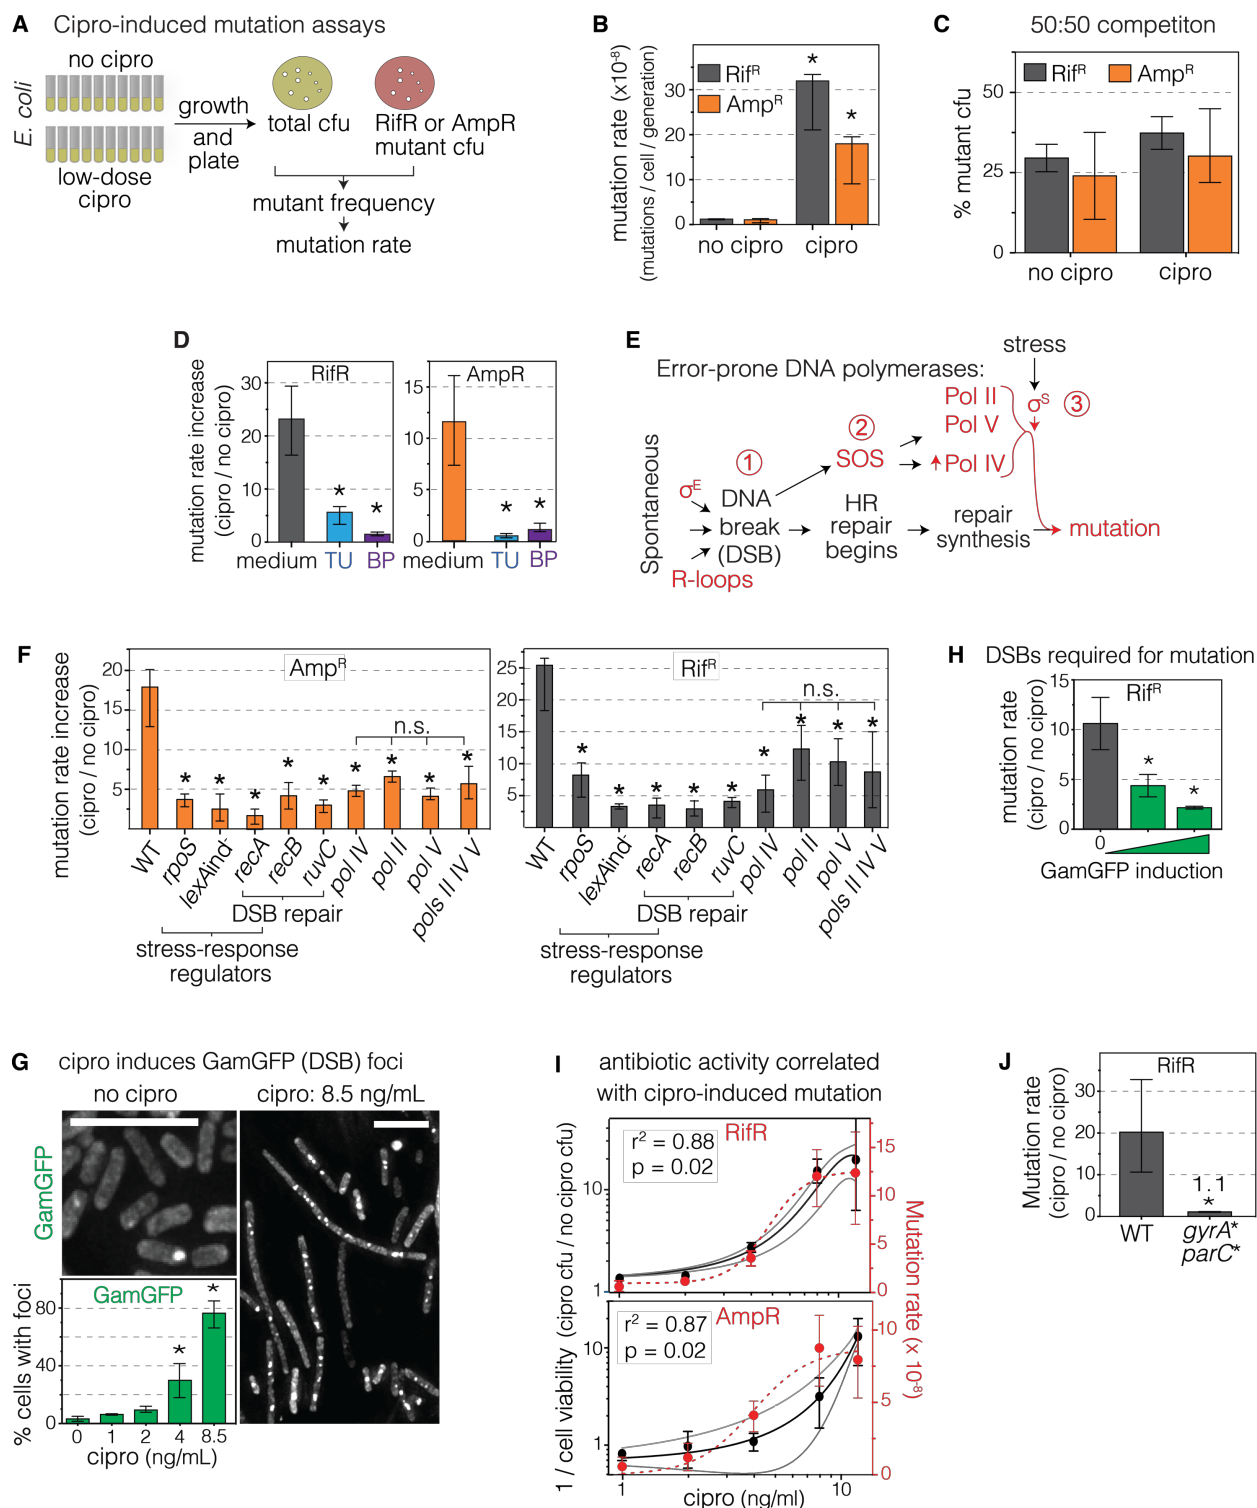

859 **Figure 1. Cipro-Induced Mutagenesis to Antibiotic Cross Resistance via Cipro-Induced**  
 860 **ROS and Mutagenic Break Repair**

861 (A) Mutation assays (fluctuation tests). Following growth with/without low-dose cipro, rifampicin-  
 862 and ampicillin-resistant (Rif<sup>R</sup>, Amp<sup>R</sup>) mutant cfu are selected (in the absence of cipro) (Methods).

863 Mutation rates estimated per **Methods**.

864 (B) Low-dose cipro induces Rif<sup>R</sup> and Amp<sup>R</sup> mutagenesis. Mutation rates, with and without  
865 exposure to sub-inhibitory cipro (8.5 ng/mL). Sequences of Rif<sup>R</sup> base substitutions in *rpoB* gene  
866 shown [Figure S1A,C](#); sequences of Amp<sup>R</sup> null mutations in *ampD*, [Figure S1B,C](#). \*Different from  
867 no cipro at  $p < 0.001$ , two-tailed Student's *t*-test.

868 (C) Competition experiments show that neither Rif<sup>R</sup> *rpoB* mutants nor Amp<sup>R</sup> *ampD* mutants has  
869 a growth advantage in low-dose cipro. Mutant and non-mutant cells mixed at 50% of each, then  
870 grown in low-dose cipro per mutation assays. *rpoB* and *ampD* mutants grow less well than their  
871 isogenic parents, occupying <50% after growth (Amp<sup>R</sup>  $p = 0.0098$ ; Rif<sup>R</sup>  $p = 0.0014$ , 1 sample *t*-  
872 test). Thus, the fold-induction of Rif<sup>R</sup> and Amp<sup>R</sup> mutation rate by cipro (e.g., D) is likely to be an  
873 underestimate, and induction of mutagenesis, not selection for Rif<sup>R</sup> or Amp<sup>R</sup>, underlies increased  
874 mutant cfu (B, D, throughout). Means  $\pm$  SEM of 3 independent experiments.

875 (D) ROS are required for cipro-induced Rif<sup>R</sup> and Amp<sup>R</sup> mutagenesis. ROS scavenger thiourea  
876 (TU) (Wasil et al., 1987), or preventative 2,2'-bipyridine (BP) (Mello Filho et al., 1984) reduces  
877 mutation rates (additional controls [Figure S2](#)). Data displayed as fold induction of mutation rate.  
878 Means  $\pm$  95% CI of  $\geq 3$  independent experiments. \*Different from medium at  $p < 0.001$ , one-way  
879 ANOVA with Tukey's post-hoc test of natural-log transformed data.

880 (E) Starvation-stress-induced mutagenic break repair (MBR), reviewed (Al Mamun et al., 2012;  
881 Fitzgerald et al., 2017), requires--(1) a DNA double-strand break (DSB) and its repair by  
882 homologous recombination (HR); (2) activation of the SOS response, which transcriptionally  
883 upregulates low-fidelity DNA pols IV, V and II; and (3) activation the  $\sigma^S$  (RpoS/*rpoS*) general-  
884 stress response, which, by unknown means, licenses use of, or errors made by, low-fidelity DNA  
885 polymerases in repair of DSBs.

886 (F) Cipro-induced mutation requires MBR-pathway proteins. Mutants grown at their respective  
887 equivalent sub-inhibitory cipro concentrations per **Methods**. Means  $\pm$  95% CIs of  $\geq 4$  independent  
888 experiments. \*Different from wild-type (WT) at  $p < 0.001$ , one-way ANOVA with Tukey's post-hoc  
889 test of natural-log transformed data; n.s. not significant from each other. Additional double-mutant  
890 data (epistasis analyses) [Figure S1E](#).

891 (G) Cipro induces DSBs dose-dependently. Phage Mu GamGFP labels DSBs as fluorescent foci  
892 that are quantified using microscopy, per (Shee et al., 2013). Representative images of GamGFP  
893 (DSB) foci in cells grown with or without sub-inhibitory cipro. White scale bar, 10  $\mu$ m. Mean  $\pm$   
894 SEM of 3 independent experiments.

895 (H) Reparable DSBs are required for cipro-induced mutagenesis. Production of the DSB-trapping  
896 GamGFP protein inhibits DSB repair (Shee et al., 2013) and reduces cipro-induced mutagenesis.  
897 Means  $\pm$  95% CIs of  $\geq 3$  independent experiments. \*Different from no GamGFP induction at  
898  $p < 0.01$ , one-way ANOVA with Tukey's post-hoc test of natural-log transformed data.

899 (I) Positive correlation of cipro-induced growth inhibition (antibiotic activity) and mutagenesis  
900 implicate cipro-induced DSBs in the mutagenesis. Antibiotic activity, 1/ viable cfu titer, left y axes;  
901 mutation rates right y axes. Pearson correlation coefficients in natural-log transformed data,  
902 indicate significant correlation of mutation rate with loss of cell viability: Rif<sup>R</sup>  $r^2 = 0.87$ ,  $p = 0.02$ ;  
903 Amp<sup>R</sup>  $r^2 = 0.88$ ,  $p = 0.02$ . Means  $\pm$  95% CI (right y axes) SD (left y axes) of  $\geq 3$  independent  
904 experiments.

905 (J) Cipro binding to its target type-II topoisomerases is required for induction of mutagenesis,  
906 supporting cipro-induced DSBs in the mutagenesis, and obviating potential off-target effects.  
907 *gyrA*\* S83L/D87Y *parC*\* S80I/E84G mutations, which encode functional gyrase and  
908 topoisomerase IV proteins that cannot be bound by cipro, prevent mutagenesis. Means  $\pm$  95%  
909 CIs of 3 independent experiments. \*Different from WT at  $p < 0.001$ , two-tailed Student's *t*-test of  
910 natural-log transformed data.

911 See also [Figures S1, S2, and S3](#), and [Table S1](#).

912

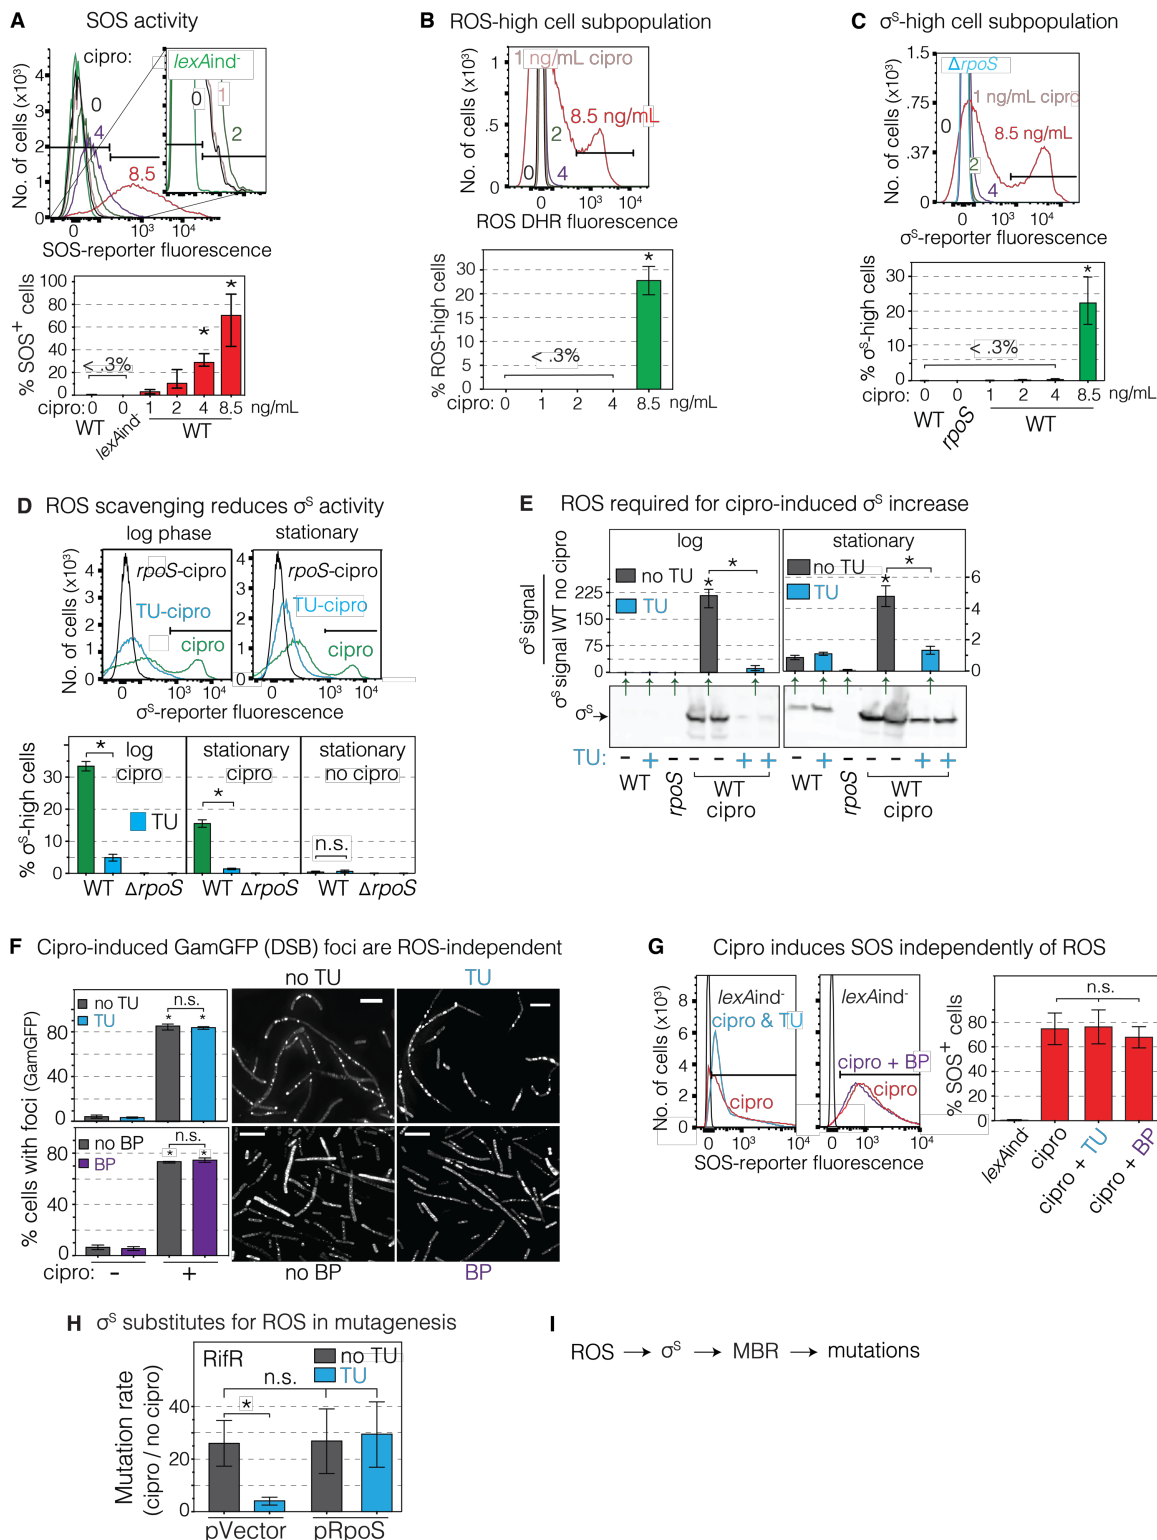

913 **Figure 2. ROS Form in Minority Cell Subpopulation, Activate  $\sigma^S$  Response and MBR**  
 914 (A) Population-wide dose-dependent activation of the SOS response by cipro. Flow-cytometry  
 915 assay of log-phase cells with chromosomal SOS reporter  $P_{sulA}MCherry$  quantifies single cells with  
 916 DNA damage that triggers the SOS response. SOS-positive cells are those right of the gate  
 917 illustrated (black bars, **Methods**). Fluorescence, arbitrary fluorescence units (afu). Means  $\pm$  SEM



918 of 3 independent experiments. \*Different from no cipro at  $p < 0.01$ , one-way ANOVA with Tukey's  
919 post-hoc test.  
920 (B) Low-dose cipro induces high ROS in a minority cell subpopulation:  $25\% \pm 6\%$  of cells in log  
921 phase. Flow cytometry assay of log-phase cells showing green fluorescence of ROS-detecting  
922 dye dihydrorhodamine 123 (DHR). ROS-high cells scored as those within the gate illustrated  
923 (black horizontal bar). Means  $\pm$  SEM of 3 independent experiments. \*Different from no cipro at  
924  $p < 0.01$ , one-way ANOVA with Tukey's post-hoc test  
925 (C) Low-dose cipro induces high  $\sigma^S$ -general-stress-response activity in a minority cell  
926 subpopulation:  $22\% \pm 3\%$  of cells in log phase. Flow cytometry assay of log-phase cells showing  
927  $\sigma^S$ -response activity as fluorescence from  $\sigma^S$ -response reporter *yiaG-yfp*.  $\sigma^S$ -high cells are those  
928 right of the gate shown (black bar, **Methods**). Stationary-phase cells at time of assay for mutants  
929 have smaller  $\sigma^S$ -high subpopulation of  $\sim 10\%$  of cells (F below, [Figures 3 and 4](#)). Means  $\pm$  range  
930 of 2 independent experiments. \*Different from no cipro at  $p < 0.01$ , one-way ANOVA with Tukey's  
931 post-hoc test.  
932 (D) ROS are required for cipro induction of the  $\sigma^S$  response. ROS scavenger TU reduces  $\sigma^S$   
933 activity, removing the  $\sigma^S$  high-activity cell subpopulation. Flow cytometric assays per (C). Means  
934  $\pm$  SEM of 3 independent experiments. \* $p < 0.01$ , one-way ANOVA with Tukey's post-hoc test.  
935 (E) ROS are required for cipro induction of  $\sigma^S$ -protein levels. Scavenging ROS with TU inhibits  
936  $\sigma^S$ -protein accumulation in log and stationary phase. Quantification and representative  $\sigma^S$  western  
937 blot. Means  $\pm$  range of 2 independent experiments. \*Different from no cipro at  $p < 0.01$ , one-way  
938 ANOVA with Tukey's post-hoc test.  
939 (F) Cipro induces DSBs independently of ROS. Reduction of ROS with TU or BP does not alter  
940 levels of GamGFP (DSB) foci in cells grown with or without cipro. Representative images of  
941 GamGFP (DSB) foci, per (Shee et al., 2013). White scale bar, 5  $\mu\text{m}$ . Means  $\pm$  SEM of  $\geq 3$   
942 independent experiments. \*Different from no cipro at  $p < 0.001$ , one-way ANOVA with Tukey's  
943 post-hoc test; n.s. not significant.  
944 (G) SOS induction is independent of ROS. ROS reducers TU and BP do not inhibit SOS-response  
945 activation. SOS activity measured by flow cytometry in strains with the chromosomal SOS  
946 reporter *P<sub>sulA</sub>mCherry*. Means  $\pm$  SEM of  $\geq 3$  independent experiments. n.s. not significant, one-  
947 way ANOVA with Tukey's post-hoc test.  
948 (H) Engineered production  $\sigma^S$  substitutes for ROS in cipro-induced mutagenesis, allowing  
949 mutagenesis in TU-treated cells. The data imply that the sole or major role of ROS in cipro-  
950 induced mutagenesis is activation of the  $\sigma^S$  response, making ROS unnecessary when  $\sigma^S$  is  
951 produced artificially. ROS and  $\sigma^S$  also work in the same pathway (are epistatic, [Figure S1F](#)).  
952 Means  $\pm$  range of 2 independent experiments. \* $p < 0.01$ , one-way ANOVA with Tukey's post-hoc  
953 test; n.s., not significant.  
954 (I) Summary: cipro-induced ROS induce the  $\sigma^S$  response, which allows mutagenic break repair  
955 (MBR) and generation of mutations. Not shown: the ROS and  $\sigma^S$  response occur in minority cells  
956 subpopulation(s).  
957 See also [Figures S1, S2, S3, and S4](#), and [Tables S1 and S2](#).  
958

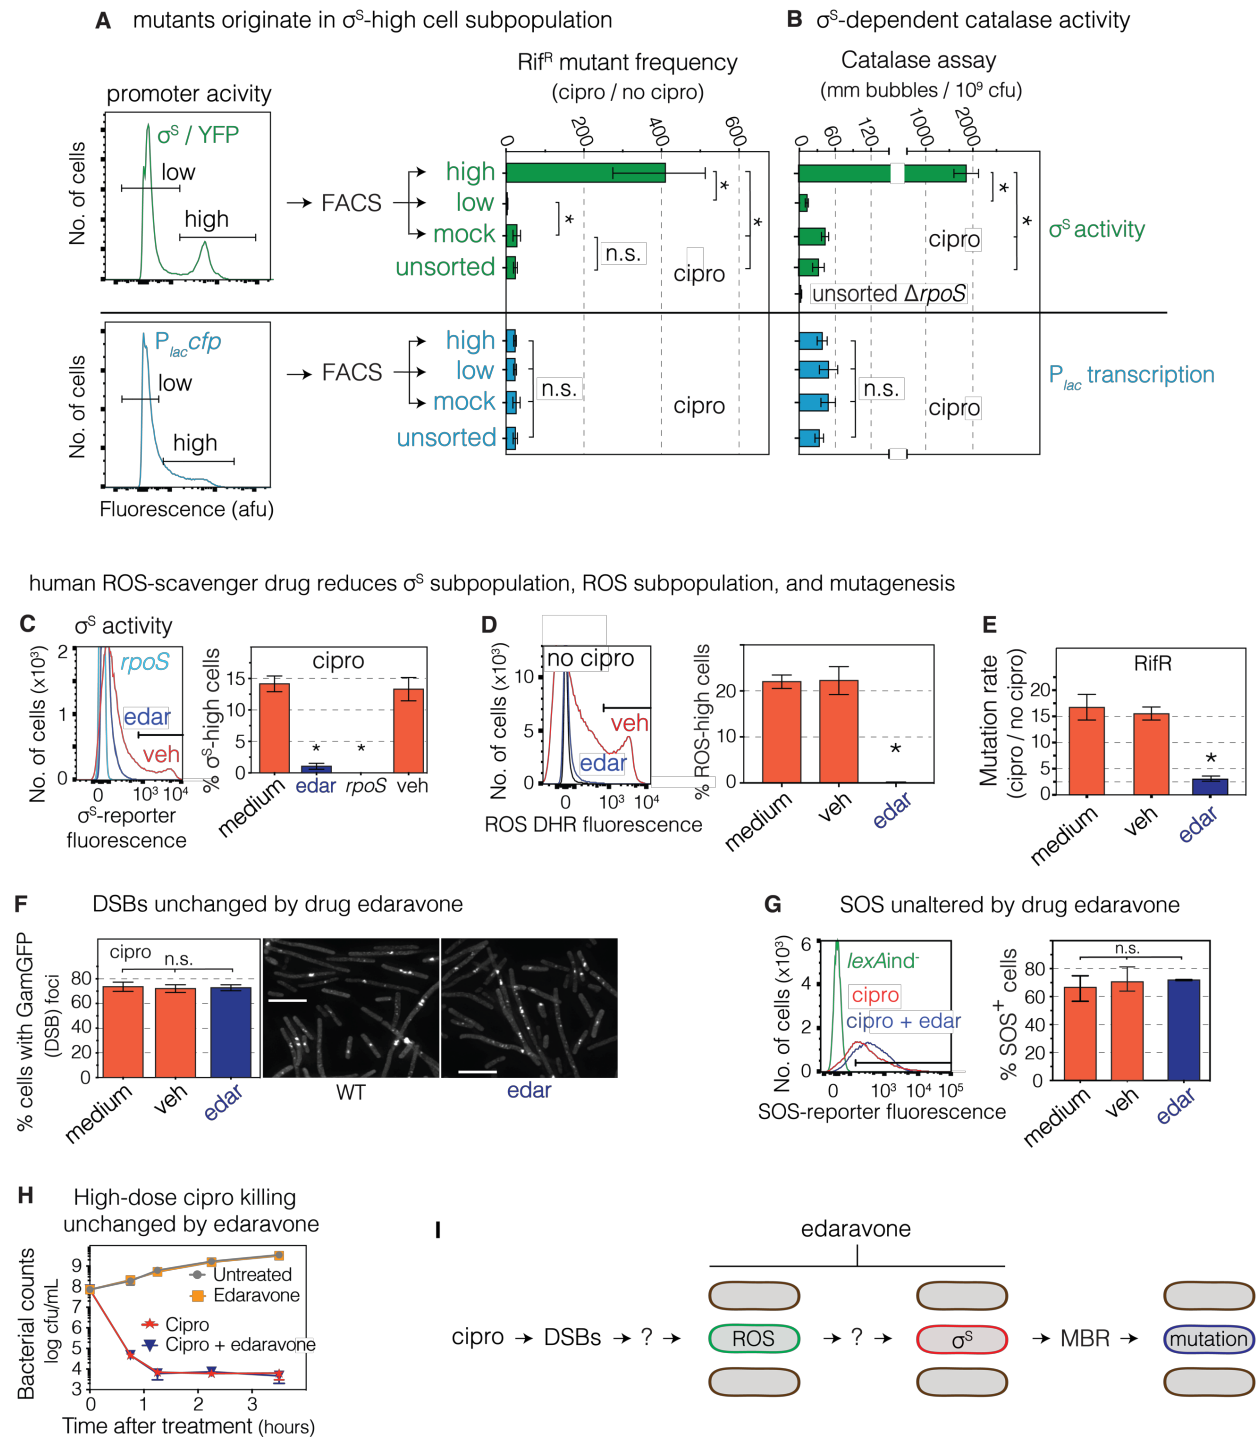

959 **Figure 3.  $\sigma^S$ -response-high Gambler Cell Subpopulation Generates Mutants, Is Inhibited by**  
 960 **FDA-approved Drug**

961 (A) Most cross-resistant mutants are produced by the minority  $\sigma^S$  high-activity cell subpopulation.  
 962 Cells with high and low fluorescence from  $\sigma^S$ -response or *lac* reporters were sorted by FACS and  
 963 assayed for mutants. Induction of mutants by cipro:  $400 \pm 7$ -fold in minority  $\sigma^S$ -high cells ( $13 \pm 1\%$   
 964 of cells);  $25 \pm 3$ -fold in unsorted and mock-sorted cells;  $3 \pm 1$ -fold in the majority  $\sigma^S$ -low cells  
 965 ( $87 \pm 1\%$  of cells). These equate to  $\geq 88\%$  of cipro-induced mutants arising in 13% of cells (text).  
 966 Mutant frequencies, means  $\pm$  95% CI of 3 independent experiments. \* $p < 0.01$ , one-way ANOVA

967 with Tukey's post-hoc test; n.s., not significant.  
968 (B) High  $\sigma^S$ -dependent catalase activity in  $\sigma^S$  high-activity cells, confirms their  $\sigma^S$ -high status. HPII  
969 is the  $\sigma^S$ -regulated catalase. Means  $\pm$  SEM of 3 independent experiments. \* $p < 0.01$ , one-way  
970 ANOVA with Tukey's post-hoc test; n.s., not significant.  
971 (C) FDA-approved antioxidant drug edaravone inhibits appearance of the  $\sigma^S$ -response-activated  
972 cell subpopulation. Flow-cytometry of stationary-phase cells with the *yiaG-yfp*  $\sigma^S$ -response  
973 reporter. Representative flow cytometry histograms of cells grown with cipro, with or without  
974 edaravone. Means  $\pm$  range of 2 independent experiments. \*Different from medium at  $p < 0.001$ ,  
975 one-way ANOVA with Tukey's post-hoc test.  
976 (D) FDA-approved antioxidant drug edaravone inhibits appearance of the ROS-high cell  
977 subpopulation required for  $\sigma^S$ -response induction (Figure 2D,E,H). Flow-cytometry of stationary-  
978 phase cells with DHR123 ROS dye. Different from medium at  $p < 0.001$ , one-way ANOVA with  
979 Tukey's post-hoc test.  
980 (E) FDA-approved antioxidant drug edaravone inhibits cipro-induced mutagenesis. Means  $\pm$   
981 range of 2 independent experiments. \*Different from no-drug samples at  $p < 0.001$ , one-way  
982 ANOVA with Tukey's post-hoc test  
983 (F, G) Edaravone does not affect (F) cipro induction of DSBs, quantified as GamGFP foci per  
984 (Shee et al., 2013), or (G) the SOS response, measured by flow cytometry in cells carrying the  
985 chromosomal SOS reporter *P<sub>sulA</sub>mCherry*. Means  $\pm$  range of 2 independent experiments. n.s.,  
986 not significant from WT, one-way ANOVA with Tukey's post-hoc test.  
987 (H) FDA-approved antioxidant drug edaravone does not reduce high-dose cipro antibiotic killing  
988 activity. Log-phase cells grown with or without high-dose cipro (1.5 $\mu$ g/mL) with or without  
989 edaravone, and cfu/mL determined. Means  $\pm$  range of 2 independent experiments.  
990 (I) Summary: cipro induces high ROS levels in a minority cell subpopulation. The  $\sigma^S$  high-activity  
991 cell subpopulation generates most resistant mutants: a gambler cell subpopulation. FDA-  
992 approved anti-oxidant drug edaravone inhibits mutagenesis by reducing ROS and appearance of  
993 the  $\sigma^S$ -high gambler cell subpopulation. Whether the ROS-high cells are the same cells as the  
994  $\sigma^S$ -high cell subpopulation is addressed Figure 4. The source of ROS induced by cipro, shown  
995 with ? to the left of the ROS-high cell, and how ROS promote  $\sigma^S$  activation, shown with ? to the  
996 right of the ROS-high cell, are unknown and are addressed below. Ovals, *E. coli* cells.  
997 See also Figures S2, S5, and S6, and Tables S1 and S2.

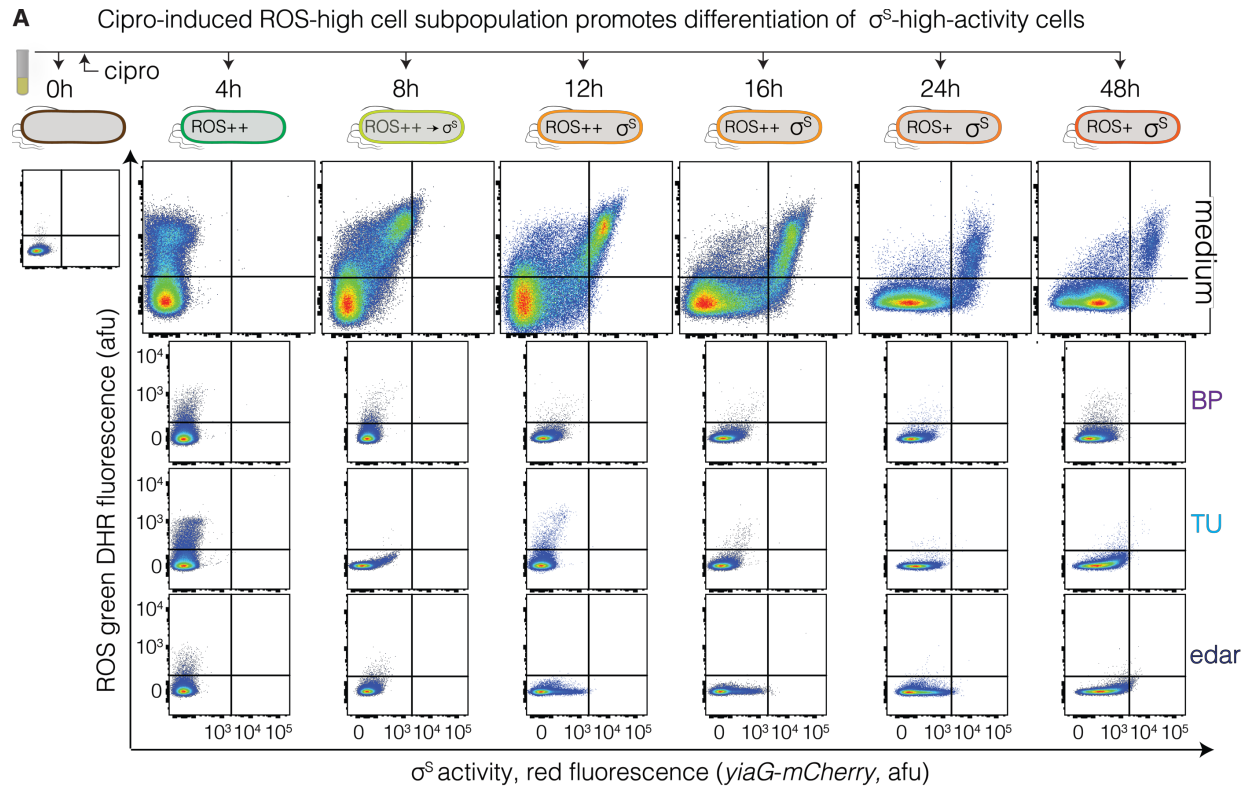

**B** Cipro-induced activation of oxidative stress response-high subpopulation promotes differentiation of  $\sigma^S$ -high-activity cells

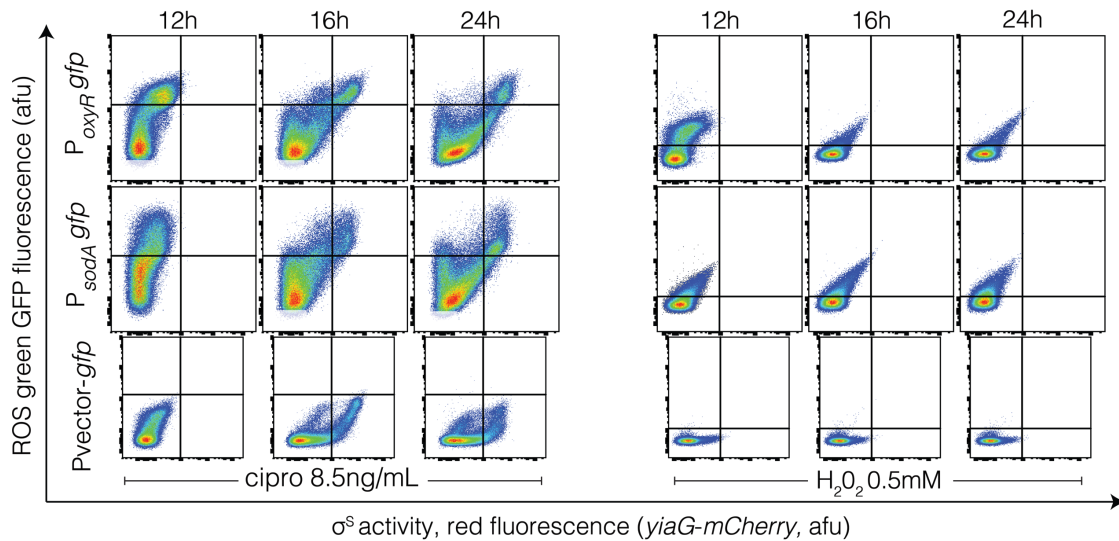

**C**  $\sigma^S$  induction occurs in ROS-high cells

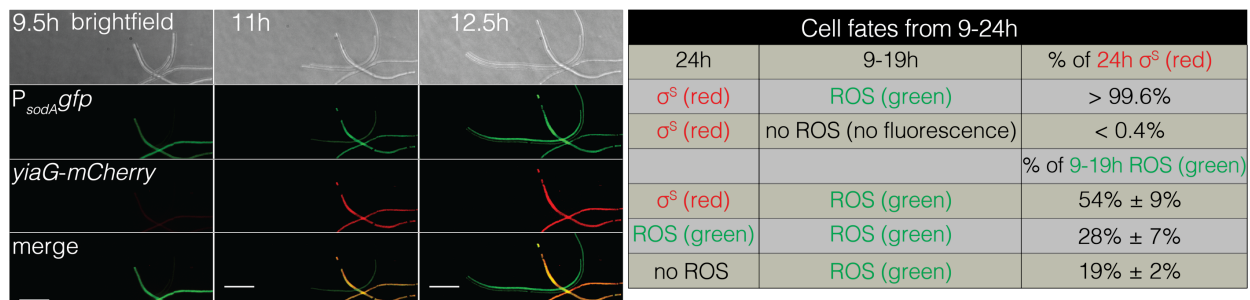

998

**Figure 4. ROS-high Subpopulation Cells Become  $\sigma^S$ -High-Activity Cells**

999 **Figure 4. ROS-high Subpopulation Cells Become  $\sigma^S$  High-Activity Cells**

1000 (A) Cipro-induced ROS-positive cells give rise to many of the  $\sigma^S$  high-activity cells. Cells grown  
1001 with subinhibitory cipro, with and without the ROS reducers 2, 2' bipyridine (BP), thiourea (TU),  
1002 or edaravone (edar) were collected serially and analyzed by flow cytometry for ROS-positive cells  
1003 (DHR dye) and  $\sigma^S$  activity using the *yiaG-mCherry*  $\sigma^S$ -response reporter. ROS-high cells precede  
1004  $\sigma^S$ -high cells, and the presence of double-positive cells indicates that many of the  $\sigma^S$ -active red  
1005 cells arise from ROS-high green cells. Double positives are seen in the upper right quadrant,  
1006 times 8-48h. Data, representative of 3 experiments.

1007 (B) Cipro-induced ROS-high cells, detected by OxyR and SodA oxidative-stress-response  
1008 reporters, promote  $\sigma^S$  activation. Live cells carrying the  $P_{oxyR}gfp$  or  $P_{sodA}gfp$  oxidative-stress-  
1009 response reporters and the *yiaG-mCherry*  $\sigma^S$ -response reporter were grown with subinhibitory  
1010 cipro, or 0.5mM H<sub>2</sub>O<sub>2</sub> control (**Supplemental Discussion S3**), collected and analyzed by flow  
1011 cytometry. Double-positive ROS-high,  $\sigma^S$ -high cells indicate that many  $\sigma^S$ -high cells had high ROS.  
1012 The OxyR response is activated by endogenous H<sub>2</sub>O<sub>2</sub> and SodA by superoxide. Data are  
1013 representative of 2 experiments.

1014 (C) Most or all  $\sigma^S$  high-activity (red) cells arise from oxidative stress-response-activated green  
1015 cells. Live-cell time-lapse imaging of cells carrying the  $P_{sodA}gfp$  oxidative-stress-response reporter  
1016 and *yiaG-mCherry*  $\sigma^S$ -response reporter were grown with sub-inhibitory cipro for 8 hours, then  
1017 imaged during growth for 12 additional hours using time-lapse deconvolution microscopy.  
1018 Representative image and quantification show that essentially all  $\sigma^S$ -active red cells at 24h arose  
1019 from cells that were ROS-high and green at 9-19h (>99%). Also, most (54%) but not all (28%)  
1020 ROS-high cells at 19h have become  $\sigma^S$ -active at 24h, and some ROS-high cells at 19h lose their  
1021 ROS by 24h (19%). Scale bar, 10 $\mu$ M. Mean  $\pm$  range of 2 experiments tracking  $\geq$  250 cells.

1022 See also [Figure S5](#), and [Movie S1](#).

1023

**A** Cipro increases  $\sigma^S$  levels via sRNAs and Hfq

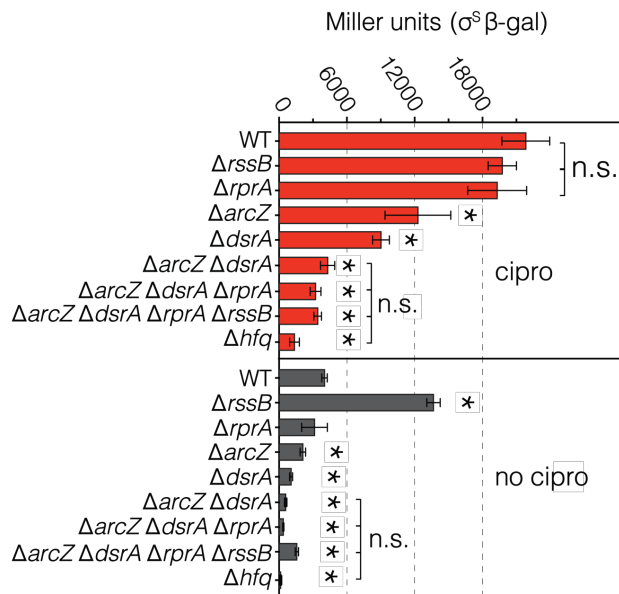

**B** Cipro induces  $\sigma^S$  activity via sRNAs and Hfq

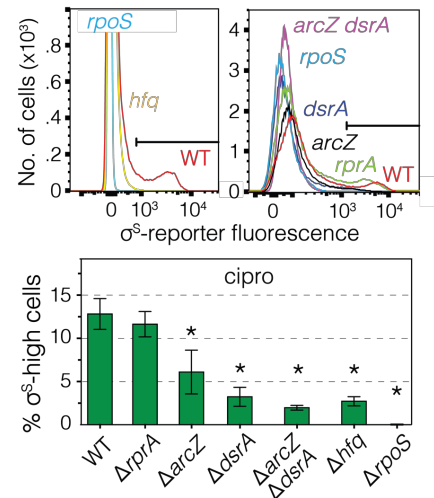

**C**  $\sigma^S$  substitutes for Hfq in mutagenesis

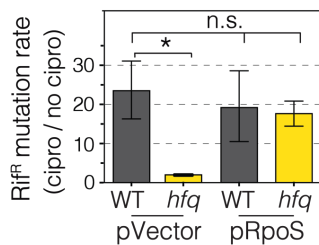

**D** Cipro-induced ROS induce *dsrA*, *arcZ* sRNA-gene promoters

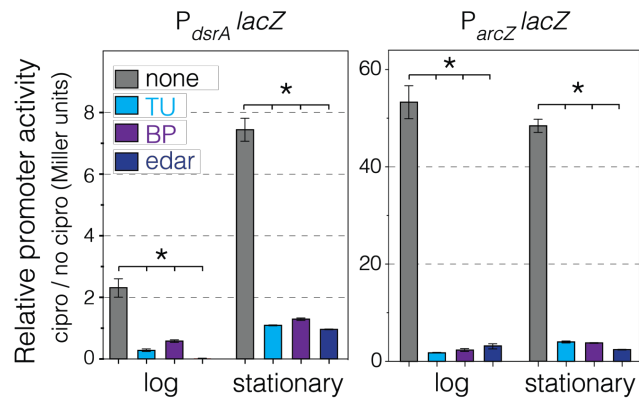

**E**

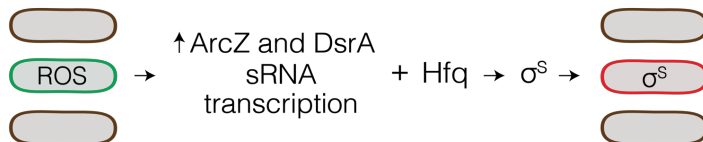

1024 **Figure 5. ROS induce transcription of sRNAs that upregulate  $\sigma^S$  and the general stress**  
 1025 **response**

1026 (A) Small RNAs (sRNAs) DsrA and ArcZ and the RNA chaperone Hfq are required for cipro-  
 1027 induction of  $\sigma^S$  protein. DsrA and ArcZ, assisted by Hfq, promote translation of *rpoS* mRNA to  $\sigma^S$   
 1028 protein (Battesti et al., 2011), implying translational upregulation of  $\sigma^S$  response by cipro-  
 1029 generated ROS.  $\sigma^S$ - $\beta$ -galactosidase activity reports  $\sigma^S$  production and degradation (Wassarman  
 1030 et al., 2001). The data imply that cipro induction of  $\sigma^S$  protein occurs via sRNA-facilitated  
 1031 translation. Because RssB facilitates degradation of  $\sigma^S$  protein, the increase of  $\sigma^S$  protein levels  
 1032 in  $\Delta$ *rssB* cells without cipro, but not with, implies that reduction of  $\sigma^S$  degradation is also part of  
 1033 how cipro-induced ROS upregulate  $\sigma^S$ . Means  $\pm$  SEM of 3 independent experiments. \*Different

1034 from WT with cipro (top half) or WT without cipro (bottom half) at  $p < 0.01$ , one-way ANOVA with  
1035 Tukey's post-hoc test.  
1036 (B) DsrA, ArcZ, and Hfq mediate cipro induction of  $\sigma^S$ -response activity in stationary-phase cells.  
1037 Representative flow cytometry histograms showing the loss of  $\sigma^S$  high-activity cells in *dsrA*, *arcZ*  
1038 and *hfq* null mutants. Means  $\pm$  SEM of 3 independent experiments. \*  $p < 0.01$ , one-way ANOVA  
1039 with Tukey's post-hoc test; n.s. not significant.  
1040 (C) Artificial upregulation of  $\sigma^S$  substitutes for Hfq in cipro-induced mutagenesis. Thus, the major  
1041 role of Hfq in mutagenesis is upregulation of  $\sigma^S$ ; if  $\sigma^S$  is otherwise supplied, Hfq is no longer  
1042 needed. RifR mutation rates quantified with or without sub-inhibitory cipro. Means  $\pm$  range of 2  
1043 independent experiments. \*  $p < 0.01$ , one-way ANOVA with Tukey's post-hoc test; n.s. not  
1044 significant.  
1045 (D) Cipro-induced ROS upregulate transcription from the promoters of the *dsrA* and *arcZ* sRNA  
1046 genes, quantified as beta-galactosidase activity from  $P_{dsrA}lacZ$  and  $P_{arcZ}lacZ$  transcriptional-fusion  
1047 reporters in cells grown with or without sub-inhibitory cipro, with or without ROS reducers TU, BP,  
1048 or edaravone. Means  $\pm$  range of 2 independent experiments. \*  $p < 0.01$ , one-way ANOVA with  
1049 Tukey's post-hoc test.  
1050 (E) Summary: Cipro-induced ROS in subpopulation cells induce transcription of the DsrA and  
1051 ArcZ sRNAs which, with the Hfq RNA chaperone, upregulate  $\sigma^S$  in the same ROS-high cells  
1052 (Figure 4).

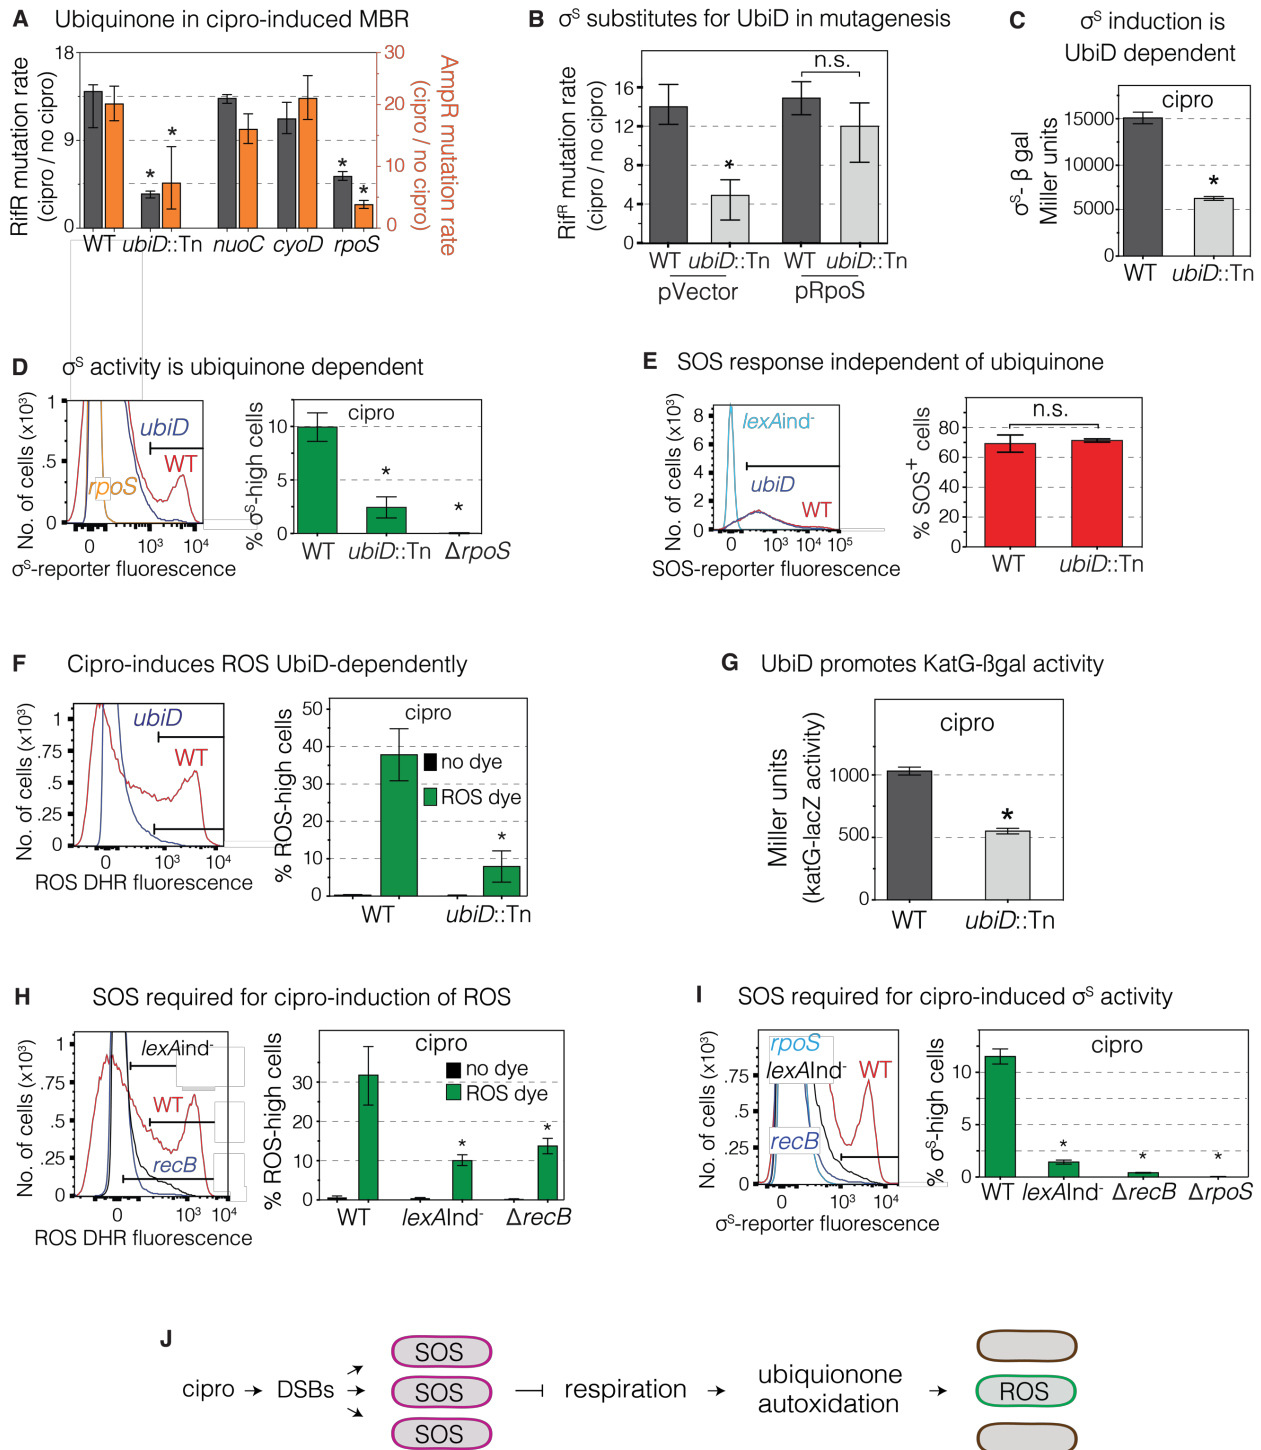

1053 **Figure 6. ROS Induction is SOS and Ubiquinone (Electron Transfer) Dependent**  
 1054 (A) Ubiquinone promotes cipro-induced RifR and AmpR mutagenesis. Left y-axis, gray bars (RifR);  
 1055 right y-axis, orange bars (AmpR). Mutants were grown at their respective subinhibitory cipro  
 1056 concentrations. Means  $\pm$  95% confidence intervals (CIs) of  $\geq 3$  independent experiments.  
 1057 \*Different from wild-type (WT) at  $p < 0.01$ , one-way ANOVA with Tukey's post-hoc test of natural-  
 1058 log transformed data.  
 1059 (B) Artificial upregulation of  $\sigma^S$  substitutes for UbiD in mutagenesis. The data imply that UbiD  
 1060 promotes mutagenesis by upregulation of  $\sigma^S$ , and so is not needed when  $\sigma^S$  is otherwise



1061 upregulated. Means  $\pm$  95% CIs of  $\geq 3$  independent experiments. \*Different from WT at  $p < 0.01$ ,  
1062 one-way ANOVA with Tukey's post-hoc test of natural-log transformed data; n.s. not significant.  
1063 (C) Cipro-induced  $\sigma^S$  protein accumulation is promoted by UbiD.  $\sigma^S$ - $\beta$ -galactosidase activity  
1064 reports  $\sigma^S$  protein levels. Means  $\pm$  range of 2 independent experiments. \*Different from wild-type  
1065 at  $p < 0.01$ , two-tailed Student's *t*-test.  
1066 (D) High cipro-induced  $\sigma^S$  activity requires UbiD. Flow-cytometry assay of  $\sigma^S$  activity as  
1067 fluorescence from the *yiaG-yfp*  $\sigma^S$ -response reporter shows loss of the  $\sigma^S$  high-activity cell  
1068 subpopulation in a *ubiD* null mutant. Means  $\pm$  SEM of 2 independent experiments. \*Different from  
1069 wild-type at  $p < 0.01$ , one-way ANOVA with Tukey's post-hoc test.  
1070 (E) Cipro induction of the SOS response does not require UbiD. SOS activity in stationary-phase  
1071 cells measured by flow cytometry as fluorescence from SOS-reporter gene *P<sub>sulA</sub>mCherry*.  
1072 Representative flow cytometry histograms show no difference in SOS activity in *ubiD*-null cells.  
1073 Means  $\pm$  range of 2 independent experiments. n.s. not significantly different from WT, two-tailed  
1074 Student's *t*-test.  
1075 (F) Cipro induction of ROS requires UbiD. ROS-positive cells in log phase dyed with  
1076 dihydrorhodamine 123 (DHR). Means  $\pm$  SEM of 3 independent experiments. \*Different from WT  
1077 at  $p < 0.01$ , one-way ANOVA with Tukey's post-hoc test.  
1078 (G) UbiD promotes cipro induction of the H<sub>2</sub>O<sub>2</sub> responsive *katG-lacZ* fusion. WT and *ubiD* strains  
1079 grown with sub-inhibitory cipro were assayed for *katG-lacZ* activity in log-phase. Means  $\pm$  range  
1080 of 2 independent experiments. \* $p < 0.01$ , two-tailed Student's *t*-test  
1081 (H) The SOS response is required for cipro induction of the ROS-high cell subpopulation. SOS  
1082 non-inducible *lexA*Ind<sup>-</sup> and *recB* cells, which are defective in SOS induction by DSBs, do not  
1083 generate the ROS-high cell subpopulation. Means  $\pm$  range of 2 independent experiments.  
1084 \*Different from WT at  $p < 0.01$ , one-way ANOVA with Tukey's post-hoc test.  
1085 (I) The SOS response is required for cipro induction of the  $\sigma^S$  high-activity cell subpopulation,  
1086 which is prevented in SOS non-inducible *lexA*Ind<sup>-</sup> cells, and *recB* cells deficient in DSB-induction  
1087 of the SOS response. Means  $\pm$  range of 2 independent experiments. \*Different from wild-type at  
1088  $p < 0.01$ , one-way ANOVA with Tukey's post-hoc test.  
1089 (J) Model for cipro-induction of ROS via the SOS response and ubiquinone. Cipro causes DSBs,  
1090 which activate the SOS response in all cells. The SOS response can slow aerobic respiration  
1091 (Swenson and Schenley, 1974), which promotes autoxidation of ubiquinone (Gonzalez-Flecha  
1092 and Demple, 1995; Skulachev, 1998), we suggest in a cell subpopulation, which generates ROS  
1093 in that population. Because UbiD is not needed for cipro induction of the SOS response, but UbiD  
1094 and SOS are required for cipro-induction of ROS and  $\sigma^S$ -high cells, we infer that SOS acts  
1095 upstream of electron transfer/ubiquinone in inducing the ROS-high cell subpopulation that  
1096 becomes the  $\sigma^S$ -high cell subpopulation (Figure 5).  
1097 See Figure S4 and Tables S1 and S2.  
1098  
1099

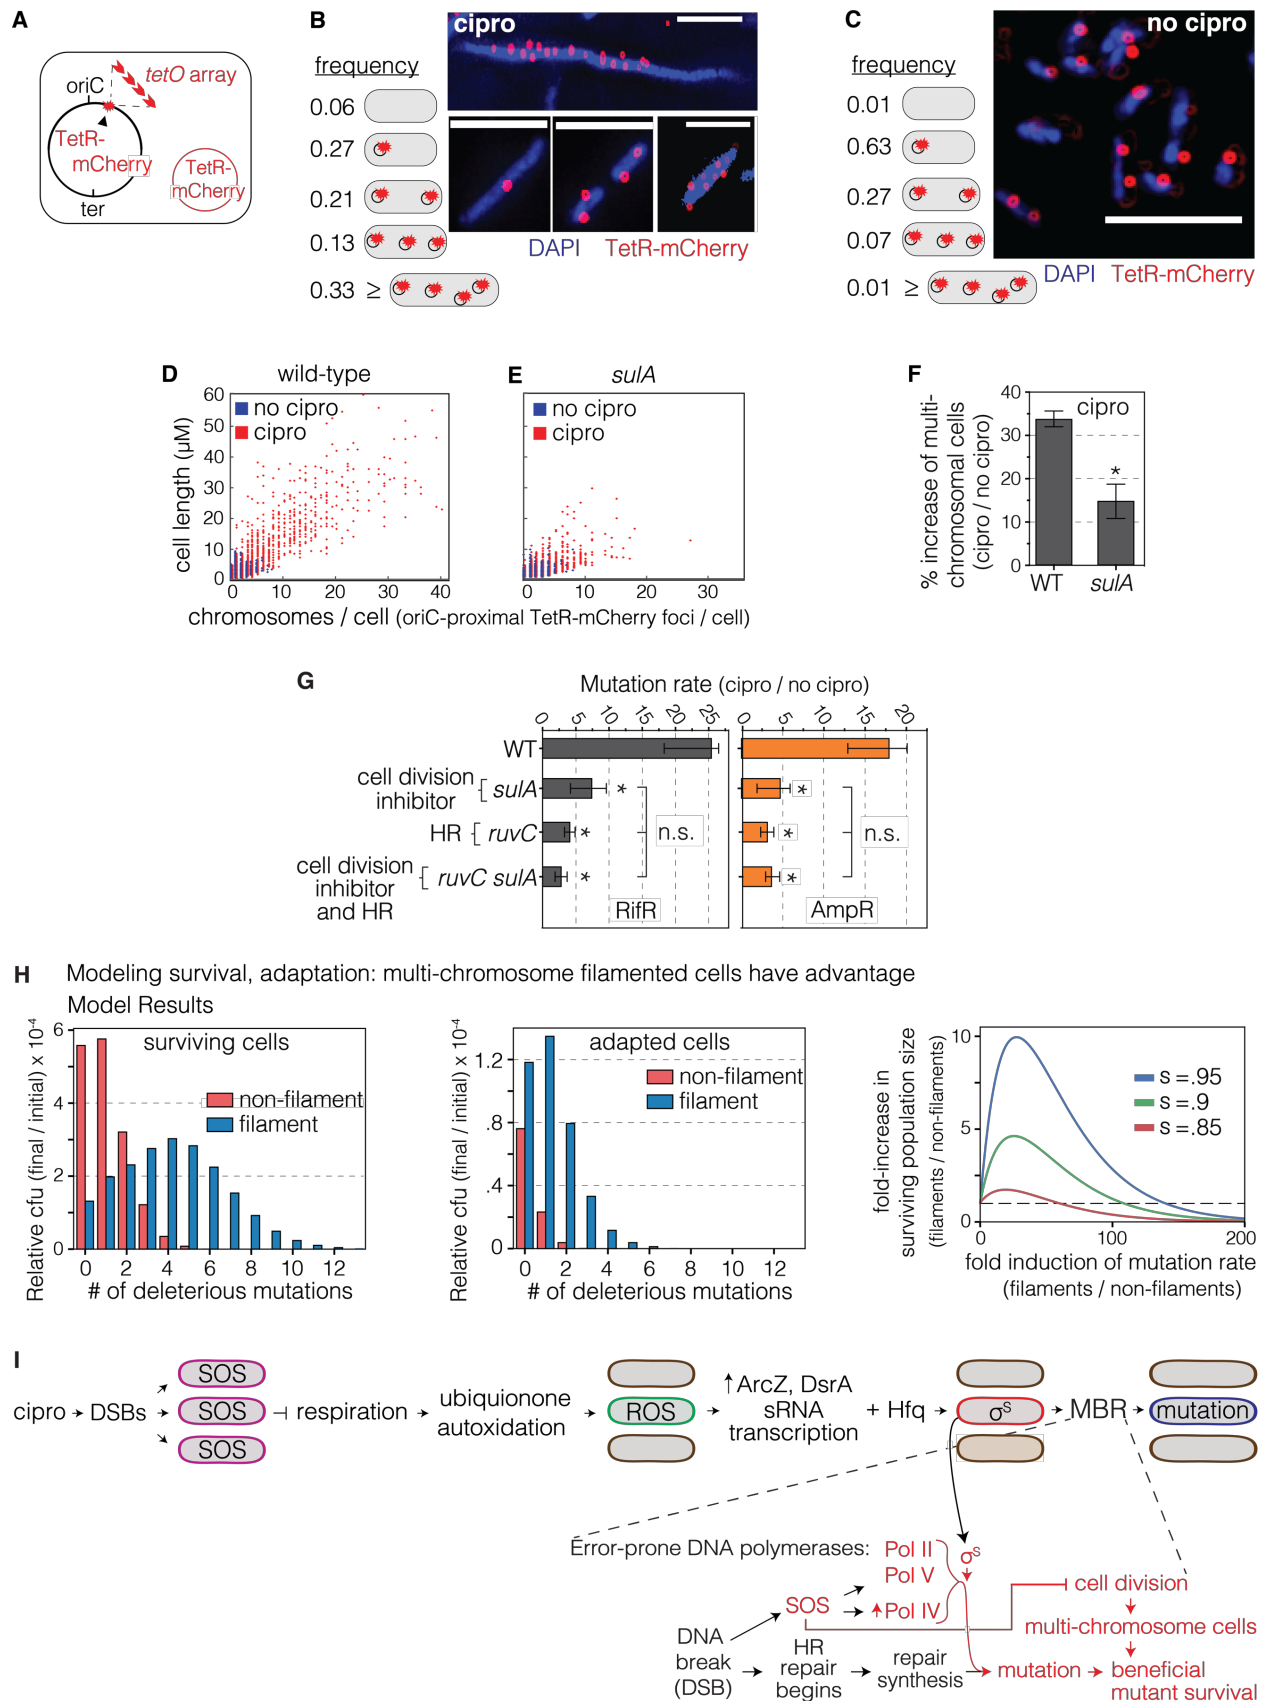

1100 **Figure 7. Multi-chromosome Bacterial Cells Promote Cipro-induced Mutagenesis**

1101 **Figure 7. Multi-chromosome Bacterial Cells Promote Cipro-induced Mutagenesis**  
1102 (A) Scheme for labeling chromosomes as red fluorescent foci using a chromosomal *tetO* array  
1103 bound by Tet-repressor-mCherry (TetR-mCherry) in a replication-origin (*oriC*)-proximal site. Red  
1104 circle, plasmid that produces TetR-mCherry. Multiple TetR-mCherry foci represent the  
1105 approximate number of *ori*-proximal chromosomal equivalents in a bacterial cell (Joshi et al.,  
1106 2013).  
1107 (B) More than 33% of cells grown in low-dose, sub-inhibitory cipro carry multiple chromosomes,  
1108 defined as  $\geq 4$  chromosomes per cell, quantified as TetR-mCherry foci, per (A), 1919 cells counted.  
1109 Representative fluorescence images of DAPI-stained log-phase WT cells. White scale bar, 5  $\mu\text{m}$ .  
1110 (C) Fewer than 1% of cells grown without cipro have multiple chromosomes, quantified as TetR-  
1111 mCherry foci, per (A), 3915 cells counted. Representative fluorescence images of DAPI-stained  
1112 log-phase cells. White scale bar, 5  $\mu\text{m}$ .  
1113 (D-F) Cipro induction of the multi-chromosome, filamented cell state requires SOS-induced cell-  
1114 division inhibitor, SulA. Scatterplots show the microscopically determined distributions of cell  
1115 lengths ( $\mu\text{m}$ ) and chromosome (TetR-mCherry) foci per cell in cells grown with and without low-  
1116 dose cipro. Data from 3 independent experiments.  
1117 (D) Cipro induction of filamented, multi-chromosome cells.  
1118 (E, F) SulA is required for the cipro-induction of long, multi-chromosome cells. 98% of untreated  
1119 cells show  $\leq 4$  chromosomes per cell. Means  $\pm$  SEM of 3 independent experiments. \*Different from  
1120 WT at  $p < 0.001$ , one-way ANOVA with Tukey's post-hoc test; n.s. not significant.  
1121 (G) The SulA-dependent multi-chromosome state promotes cipro-induced mutagenesis. SulA  
1122 and RuvC act in the same MBR pathway (are epistatic). Means  $\pm$  95% CIs of  $\geq 4$  independent  
1123 experiments. \*Different from wild-type at  $p < 0.001$ , one-way ANOVA with Tukey's post-hoc test of  
1124 natural-log transformed data; n.s. not significant.  
1125 (H) Mathematical model shows that multi-chromosome "filamented" cells have a large advantage  
1126 for adaptation and survival at high mutation rates. Left panel, expected relative cfu of all surviving  
1127 cells (adapted and not-adapted) is plotted as a function of the number of deleterious mutations  
1128 accumulated, for both filamented and non-filamented cells. Middle panel, the expected relative  
1129 cfu of adapted cells is plotted as function of the number of deleterious mutations accumulated.  
1130 Right panel, formation of multi-chromosome filaments can increase the surviving population size  
1131 when selection is harsh. The fold-increase of surviving population size due to filamentation is  
1132 plotted as function of the fold increase in mutation rate due to filamentation, for several selection  
1133 parameters.  $s$  – selection coefficient of the major stress (e.g., antibiotics). Model description and  
1134 parameters in **Methods**.  
1135 (I) Model: mechanism of cipro-induced transient differentiation of an evolvable gambler cell  
1136 subpopulation that allows stress-responsive MBR without risk to most cells, facilitated by the  
1137 multi-chromosome state. Left to right: cipro-binding to type-II topoisomerases causes DSBs that  
1138 activate the SOS response throughout the cell population. SOS upregulates error-prone DNA  
1139 polymerases and SulA, which inhibits cell division causing multi-chromosome cells. SOS also  
1140 slows aerobic respiration, we suggest, in a cell subpopulation, which generates ROS promoted  
1141 by autoxidation of ETC component ubiquinone in that subpopulation. The ROS activate  
1142 transcription of  $\sigma^S$ -upregulating sRNAs DsrA and ArcZ, which, with Hfq RNA chaperone, promote  
1143 translation of *rpoS* mRNA to  $\sigma^S$  protein, thus activating the general stress response in the cell  
1144 subpopulation, and allowing mutagenic DNA break repair (MBR) in those cells—a transient  
1145 hypermutable state in gambler cells (red cells). The limitation of mutable cells to a subpopulation  
1146 allows exploration of new phenotypes generated by genome instability in gamblers without risk to  
1147 the whole population—a potential "bet-hedging" strategy. The multi-chromosome state promotes  
1148 survival and adaptation of highly mutated cells by amelioration (complementation and  
1149 reassortment) of deleterious recessive mutant phenotypes generated.  
1150 See also [Figures S2 and S3 and S4](#) and [Tables S1 and S2](#).  
1151

1152 **STAR★Methods**

1153

1154 **Key Resources Table**

| REAGENT or RESOURCE                                                                                                                              | SOURCE                          | IDENTIFIER                     |
|--------------------------------------------------------------------------------------------------------------------------------------------------|---------------------------------|--------------------------------|
| <b>Chemicals and Recombinant proteins</b>                                                                                                        |                                 |                                |
| ciprofloxacin                                                                                                                                    | MP Biomedicals                  | Cat# 199020                    |
| rifampicin                                                                                                                                       | Research Products International | Cat# 13292-46-1                |
| ampicillin                                                                                                                                       | Sigma-Aldrich                   | Cat# A9518                     |
| doxycycline                                                                                                                                      | Alfa Aesar                      | Cat# J60422                    |
| thiourea                                                                                                                                         | Sigma-Aldrich                   | Cat# T8656                     |
| 2,2' bipyridyl                                                                                                                                   | Sigma-Aldrich                   | Cat# D216305                   |
| edaravone                                                                                                                                        | Sigma-Aldrich                   | Cat# M70800                    |
| isopropyl $\beta$ -D-1-thiogalactopyranoside                                                                                                     | Research Products International | Cat# 156000-5                  |
| 2-Nitrophenyl $\beta$ -D-galactopyranoside                                                                                                       | Sigma-Aldrich                   | Cat# N1127                     |
| dihydrorhodamine                                                                                                                                 | Life Technologies               | Cat# D632                      |
| sodium salicylate                                                                                                                                | Sigma-Aldrich                   | Cat# 54-21-7                   |
| Sytox Blue dead cell stain                                                                                                                       | Life Technologies               | Cat# S34857                    |
| <b>Experimental Models:</b>                                                                                                                      |                                 |                                |
| <b>Name</b>                                                                                                                                      | <b>Source</b>                   | <b>Identifier</b>              |
| <b>Plasmids</b>                                                                                                                                  |                                 |                                |
| pKG110 TetR-mCherry                                                                                                                              | Joshi et al., 2013              | pDB317                         |
| pNT3 empty vector                                                                                                                                | Saka et al., 2005               | $P_{tac}$                      |
| pNT3- <i>rpoS</i>                                                                                                                                | Saka et al., 2005               | $P_{tac}$ <i>rpoS</i> , AN2630 |
| pUA66                                                                                                                                            | Zaslaver et al., 2006           | $P_{vector}$ <i>gfp</i>        |
| pUA66- <i>oxyR-gfp</i>                                                                                                                           | Zaslaver et al., 2006           | $P_{oxyR}$ - <i>gfp</i>        |
| pUA66- <i>sodA-gfp</i>                                                                                                                           | Zaslaver et al., 2006           | $P_{sodA}$ - <i>gfp</i>        |
| pCP20, FLP recombinase vector                                                                                                                    | Cherepanov & Wackernagel, 1995  |                                |
| pKD46, <i>ori101 repA101TS</i><br><i>P<sub>BAD</sub>-gam-bet-exo Amp<sup>R</sup></i>                                                             | Datsenko & Wanner, 2000         |                                |
| <b>Escherichia coli K12 Strains</b>                                                                                                              |                                 |                                |
| <b>Relevant Genotype</b>                                                                                                                         | <b>Reference or Source</b>      | <b>Identifier</b>              |
| Sequenced wild-type <i>E. coli</i> K12 F <sup>-</sup> $\lambda$ <sup>-</sup>                                                                     | Blattner et al., 1997           | MG1655                         |
| MG1655 $\Delta$ <i>lacZ1</i><br><i>att<math>\lambda</math>::[pSJ501::katG'-lacZ+]FRTcatFRT</i>                                                   | Liu & Imlay, 2013               | AL441                          |
| MG1655 $\lambda_{imm21}$ <i>rpoS750-lacZ</i><br>$\Delta$ <i>arcZ8</i> $\Delta$ <i>rprA1::Kan</i><br>$\Delta$ <i>dsrA::zeo</i>                    | Susan Gottesman (NIH)           | BA701                          |
| MG1655 $\lambda_{imm21}$ <i>rpoS750-lacZ</i> ,<br><i>rssB::Tet</i> $\Delta$ <i>arcZ8</i> $\Delta$ <i>rprA1::kan</i><br>$\Delta$ <i>dsrA::zeo</i> | Battesti et al., 2015           | BA709                          |

|                                                                                                                                                                       |                                      |         |
|-----------------------------------------------------------------------------------------------------------------------------------------------------------------------|--------------------------------------|---------|
| MG1655 <i>lambda FRD2 dsrAp205 (dsrA::lacZ) ΔlacIpoZ(Δmlu)</i>                                                                                                        | Christophe Herman Lab                | CH2046  |
| MG1655 <i>asnA::tetO</i> array Gent <sup>R</sup>                                                                                                                      | Joshi et al., 2011                   | DB2159  |
| P90C Rif <sup>R</sup>                                                                                                                                                 | Cairns & Foster, 1991                | FC36    |
| <i>Δ(srlR-recA)306::Tn10</i>                                                                                                                                          | Petrosino et al., 2002               | GY8322  |
| BW25113 <i>ΔampD::FRTKanFRT</i>                                                                                                                                       | Baba et al., 2006                    | JW0106  |
| BW25113 <i>ΔmhA::FRTKanFRT</i>                                                                                                                                        | Baba et al., 2006                    | JW0204  |
| BW25113 <i>ΔcyoD::FRTKanFRT</i>                                                                                                                                       | Baba et al., 2006                    | JW0419  |
| BW25113 <i>ΔruvC::FRTKanFRT</i>                                                                                                                                       | Baba et al., 2006                    | JW1852  |
| BW25113 <i>ΔrecA::FRTKanFRT</i>                                                                                                                                       | Baba et al., 2006                    | JW2669  |
| BW25113 <i>ΔrecB::FRTKanFRT</i>                                                                                                                                       | Baba et al., 2006                    | JW2788  |
| BW25113 <i>Δhfg::FRTKanFRT</i>                                                                                                                                        | Baba et al., 2006                    | JW4130  |
| BW25113 <i>ΔrpoS::FRTKanFRT</i>                                                                                                                                       | Baba et al., 2006                    | JW5437  |
| BW25113 <i>ΔslmA::FRTKanFRT</i>                                                                                                                                       | Baba et al., 2006                    | JW16141 |
| MG1655 <i>mal::lac<sup>R</sup> ΔaraBAD araC<sup>+</sup> lacI<sup>'</sup>::P<sub>BAD</sub>-cat-sacB:lacZ mini λ tet<sup>R</sup> lacI<sup>'</sup>::ParcZ(-100)-lacZ</i> | Mandin & Gottesman, 2010             | PM1450  |
| AB1157 <i>ruvC53eda-51::Tn10</i>                                                                                                                                      | Shurvinton et al., 1984              | RDK2615 |
| MG1655 <i>ΔpolB::Spec<sup>R</sup></i>                                                                                                                                 | Cirz et al., 2005                    | RTC0003 |
| AB1157 <i>ΔumuDC595::cat</i>                                                                                                                                          | Ho et al., 1993                      | RW120   |
| MG1655 <i>ΔlacX74 λ<sub>imm21</sub>rpoS<sub>750</sub>-lacZ</i>                                                                                                        | Wassarman et al., 2001               | SG30013 |
| MG1655 <i>ΔlacX74 λ<sub>imm21</sub>rpoS<sub>750</sub>-lacZ rssB::Tet</i>                                                                                              | Zhou & Gottesman, 2006               | SG30018 |
| C600 <i>gyrA(L83,Y87) zei-723::Tn10</i>                                                                                                                               | Morgan-Linnel & Zechiedrich, 2007    | SKM11   |
| C600 <i>gyrA(L83) zei-723::Tn10 parC(I80,G84) Kan<sup>R</sup></i>                                                                                                     | Morgan-Linnel & Zechiedrich, 2007    | SKM16   |
| W3110 <i>ΔlacU169 tna2 rpoS::Tn10</i>                                                                                                                                 | Loewen & Triggs, 1984                | ZK1268  |
| MG1655 <i>ilvG<sup>+</sup> rfb<sup>+</sup> rph-1 Δ(ynaJ-ttcA)</i>                                                                                                     | Jensen, 1993                         | SMR816  |
| DM49 <i>lexA3(Ind<sup>-</sup>) malB::Tn9</i>                                                                                                                          | McKenzie et al., 2000                | SMR821  |
| FC40                                                                                                                                                                  | McKenzie et al., 2000                | SMR4562 |
| SMR4562 <i>upp::Tn10dtetA+1</i>                                                                                                                                       | Bull et al., 2001                    | SMR4576 |
| MG1655 <i>ilvG<sup>+</sup> rfb<sup>+</sup> rph-1 Δ(ynaJ-ttcA) (λ clts857 xis1)</i>                                                                                    | this work; SMR816 x (λ clts857 xis1) | SMR5158 |
| JC9387 <i>thr<sup>+</sup> ara<sup>+</sup> leu<sup>+</sup> r-m<sup>+</sup> (λ clts857 xis1) hsdR<sup>-</sup> mK<sup>+</sup> Δattλ::amp<sup>R</sup>RC</i>               | Petrosino et al., 2002               | SMR5201 |
| MG1655 <i>ilvG<sup>+</sup> rfb<sup>+</sup> rph-1 Δ(ynaJ-ttcA) (λ clts857 xis1)</i>                                                                                    | this work; SMR5158 x P1 (SMR5201)    | SMR5223 |

|                                                                                                                                                                              |                                                                                             |          |
|------------------------------------------------------------------------------------------------------------------------------------------------------------------------------|---------------------------------------------------------------------------------------------|----------|
| $\Delta att\lambda::ampRC$                                                                                                                                                   |                                                                                             |          |
| MG1655 <i>ilvG<sup>+</sup> rfb<sup>+</sup> rph-1</i><br>$\Delta(ynaJ-ttcA)$ ( $\lambda$ <i>clts857 xis1</i> )<br>$\Delta att\lambda::ampRC$<br>$\Delta(srl-recA)306::Tn10$   | this work; SMR5223 x P1 (GY8322)                                                            | SMR5226  |
| SMR4562 <i>rpoE::Tn10dCam</i>                                                                                                                                                | Gibson et al., 2010                                                                         | SMR5236  |
| SMR4562<br>$\Delta dinB50::FRTKanFRT$                                                                                                                                        | McKenzie et al., 2003                                                                       | SMR5875  |
| FC36 $\Delta dinB50::FRTKanFRT$                                                                                                                                              | McKenzie et al., 2003                                                                       | SMR5878  |
| MG1655 <i>ilvG<sup>+</sup> rfb<sup>+</sup> rph-1</i><br>$\Delta(ynaJ-ttcA)$<br>$\Delta dinB50::FRTKanFRT$                                                                    | this work; SMR810 x P1 (SMR5875)                                                            | SMR5880  |
| SMR4562<br>$\Delta mfd::FRTKanFRT$                                                                                                                                           | this work; SMR4562 x lambda Red-mediated recombineering using pKD46 with linear PCR product | SMR6367  |
| SMR4562 $\Delta sulA::FRTcatFRT$                                                                                                                                             | this work; SMR4562 x lambda Red-mediated recombineering using pKD46 with linear PCR product | SMR6665  |
| MG1655 <i>ilvG<sup>+</sup> rfb<sup>+</sup> rph-1</i><br>$\Delta(ynaJ-ttcA)$<br><i>upp::Tn10dtetA+1</i>                                                                       | this work; SMR816 x P1 (SMR4576)                                                            | SMR9541  |
| SMR4562<br>$\Delta rpoS::FRTKanFRT$                                                                                                                                          | Barreto et al., 2016                                                                        | SMR10336 |
| SMR4562 <i>yiaG-yfp</i><br>$FRTcatFRT$                                                                                                                                       | Al Mamun et al., 2012                                                                       | SMR10582 |
| FC36 $\Delta araBAD567$<br>$\Delta zie3913.1::tetRtetA+1$<br>$FRTcatFRT$                                                                                                     | Shee et al., 2011                                                                           | SMR10797 |
| MG1655 <i>ilvG<sup>+</sup> rfb<sup>+</sup> rph-1</i><br>$\Delta(ynaJ-ttcA)$<br><i>upp::Tn10dtetA+1</i><br>$\Delta sulA::FRTcatFRT$                                           | this work; SMR9541 x P1 (SMR6665)                                                           | SMR11583 |
| MG1655 <i>ilvG<sup>+</sup> rfb<sup>+</sup> rph-1</i><br>$\Delta(ynaJ-ttcA)$ ( $\lambda$ <i>clts857 xis1</i> )<br>$\Delta att\lambda::ampRC$<br>$\Delta dinB50::FRTKanFRT$    | this work; SMR5223 x P1 (SMR5878)                                                           | SMR11640 |
| MG1655 <i>ilvG<sup>+</sup> rfb<sup>+</sup> rph-1</i><br>$\Delta(ynaJ-ttcA)$ ( $\lambda$ <i>clts857 xis1</i> )<br>$\Delta att\lambda::ampRC$<br>$\Delta rpoS::FRTKanFRT$      | this work; SMR5223 x P1 (SMR10336)                                                          | SMR11641 |
| MG1655 <i>ilvG<sup>+</sup> rfb<sup>+</sup> rph-1</i><br>$\Delta(ynaJ-ttcA)$ ( $\lambda$ <i>clts857 xis1</i> )<br>$\Delta att\lambda::ampRC$ <i>lexA3</i><br><i>malB::Tn9</i> | this work; SMR5223 x P1 (SMR821)                                                            | SMR11642 |
| FC36 <i>ubiD::Tn10dCam</i>                                                                                                                                                   | Al Mamun et al., 2012                                                                       | SMR11945 |
| SMR4562<br>$\Delta nuoC::FRTKanFRT$                                                                                                                                          | Al Mamun et al., 2012                                                                       | SMR12140 |
| FC36 $\Delta araBAD567$<br>$\Delta zie3913.1::tetR-tetA+1$ FRT                                                                                                               | this work; SMR10797 x pCP20, shifted to 37°C                                                | SMR13212 |
| FC36 $\Delta araBAD567$<br>$\Delta zie3913.1::tetR-tetA+1$ FRT<br>$\Delta mfd::FRTKanFRT$                                                                                    | this work; 13212 x P1 (SMR6367)                                                             | SMR13252 |
| MG1655 $\Delta araBAD567$<br>$\Delta att\lambda::P_{BAD}$<br><i>zfd2509.2::P<sub>N25tetR</sub></i> FRT<br>$\Delta attTn7::FRTcatFRT$                                         | Shee et al., 2013                                                                           | SMR14333 |

|                                                                                                                                                                                       |                                                                                          |                    |
|---------------------------------------------------------------------------------------------------------------------------------------------------------------------------------------|------------------------------------------------------------------------------------------|--------------------|
| <i>P<sub>N25tetOgam</sub></i>                                                                                                                                                         |                                                                                          |                    |
| MG1655 $\Delta$ araBAD567<br>$\Delta$ att $\lambda$ ::P <sub>BAD</sub><br>zfd2509.2::P <sub>N25tetR</sub> FRT<br>$\Delta$ attTn7::FRTcatFRT<br><i>P<sub>N25tetOgamGFP</sub></i>       | Shee et al., 2013                                                                        | SMR14334           |
| MG1655 <i>ilvG<sup>+</sup> rfb<sup>+</sup> rph-1</i><br>$\Delta$ ( <i>ynaJ-ttcA</i> ) <i>galK::P<sub>lacCfp</sub></i><br>Amp                                                          | Amar et al., 2012                                                                        | SMR14471           |
| F <sup>-</sup> $\lambda^-$ <i>ilvG<sup>-</sup> <math>\Delta</math>rfb-50 rph<sup>+</sup></i>                                                                                          | Blattner et al., 1997                                                                    | SMR15482<br>MG1655 |
| FC36 $\Delta$ arcZ::FRTKanFRT                                                                                                                                                         | this work; FC36 x lambda Red-mediated recombineering using pKD46 with linear PCR product | SMR17747           |
| SMR4562<br>$\Delta$ arcZ::FRTKanFRT                                                                                                                                                   | this work; SMR4562 x P1 (SMR17747)                                                       | SMR17806           |
| MG1655<br>$\Delta$ att $\lambda$ ::P <sub>sulAmCherry</sub><br>FRTcatFRT                                                                                                              | Nehring et al ,2016                                                                      | SMR17962           |
| MG1655 $\Delta$ att $\lambda$ ::P <sub>sulAmCherry</sub><br>FRT                                                                                                                       | Nehring et al ,2016                                                                      | SMR17964           |
| JA200 [pNT3]                                                                                                                                                                          | Xia et al., 2016                                                                         | SMR19967           |
| SMR4562<br>$\Delta$ rprA101::FRTcatFRT                                                                                                                                                | Barreto et al., 2016                                                                     | SMR20181           |
| SMR4562<br>$\Delta$ dsrA101::FRTcatFRT                                                                                                                                                | Barreto et al., 2016                                                                     | SMR20183           |
| MG1655 $\Delta$ recB::FRTKanFRT                                                                                                                                                       | this work; SMR15482 x P1 (JW2788)                                                        | SMR20467           |
| MG1655 $\Delta$ recA::FRTKanFRT                                                                                                                                                       | this work; SMR15482 x P1 (JW2669)                                                        | SMR20475           |
| MG1655 $\Delta$ ruvC::FRTKanFRT                                                                                                                                                       | this work; SMR15482 x P1 (JW1852)                                                        | SMR20477           |
| MG1655 $\Delta$ rpoS::FRTKanFRT                                                                                                                                                       | this work; SMR15482 x P1 (JW5437)                                                        | SMR20479           |
| MG1655 $\Delta$ araBAD567<br>$\Delta$ att $\lambda$ ::P <sub>BAD</sub><br>zfd2509.2::P <sub>N25tetR</sub> FRT<br>$\Delta$ attTn7::FRT <i>P<sub>N25tetOgam</sub></i>                   | this work; SMR14333 x pCP20, shifted to 37°C                                             | SMR21124           |
| MG1655<br>$\Delta$ dinB50::FRTKanFRT                                                                                                                                                  | this work; SMR15482 x P1 (SMR5880)                                                       | SMR21321           |
| MG1655 <i>lexA3 malB::Tn9</i>                                                                                                                                                         | this work; SMR15482 x P1 (SMR821)                                                        | SMR21338           |
| MG1655 <i>ilvG<sup>+</sup> rfb<sup>+</sup> rph-1</i><br>$\Delta$ ( <i>ynaJ-ttcA</i> ) ( $\lambda$ <i>clts857 xis1</i> )<br>$\Delta$ att $\lambda$ ::ampRC<br>$\Delta$ sulA::FRTcatFRT | this work; SMR5223 X P1 (SMR11583)                                                       | SMR21772           |
| MG1655 $\Delta$ sulA::FRTcatFRT                                                                                                                                                       | this work; SMR15482 X P1 (SMR11583)                                                      | SMR21774           |
| MG1655 <i>ilvG<sup>+</sup> rfb<sup>+</sup> rph-1</i><br>$\Delta$ ( <i>ynaJ-ttcA</i> ) ( $\lambda$ <i>clts857 xis1</i> )<br>$\Delta$ att $\lambda$ ::ampRC<br><i>rpoE::Tn10dCam</i>    | this work; SMR5223 x P1 (SMR5236)                                                        | SMR21911           |
| MG1655 <i>ilvG<sup>+</sup> rfb<sup>+</sup> rph-1</i><br>$\Delta$ ( <i>ynaJ-ttcA</i> ) ( $\lambda$ <i>clts857 xis1</i> )<br>$\Delta$ att $\lambda$ ::ampRC<br>$\Delta$ rnhA::FRTKanFRT | this work; SMR5223 x P1 (JW0204)                                                         | SMR21913           |
| MG1655 <i>ilvG<sup>+</sup> rfb<sup>+</sup> rph-1</i><br>$\Delta$ ( <i>ynaJ-ttcA</i> ) ( $\lambda$ <i>clts857 xis1</i> )<br>$\Delta$ att $\lambda$ ::ampRC<br>$\Delta$ mfid::FRTKanFRT | this work; SMR5223 x P1 (SMR13252)                                                       | SMR21919           |

|                                                                                                                                                                                                                                          |                                                        |          |
|------------------------------------------------------------------------------------------------------------------------------------------------------------------------------------------------------------------------------------------|--------------------------------------------------------|----------|
| MG1655 <i>rpoE::Tn10dCam</i>                                                                                                                                                                                                             | this work; SMR15482 x P1 (SMR5236)                     | SMR21938 |
| MG1655 $\Delta$ <i>rnhA::FRTKanFRT</i>                                                                                                                                                                                                   | this work; SMR15482 x P1 (SMR10396)                    | SMR21940 |
| MG1655 $\Delta$ <i>mfd::FRTKanFRT</i>                                                                                                                                                                                                    | this work; SMR15482 x P1 (SMR13252)                    | SMR21946 |
| MG1655 <i>ilvG<sup>+</sup> rfb<sup>+</sup> rph-1</i><br>$\Delta$ ( <i>ynaJ-ttcA</i> ) ( $\lambda$ <i>clts857 xis1</i> )<br>$\Delta$ <i>att<math>\lambda</math>::ampRC</i><br>$\Delta$ <i>recB::FRTKanFRT</i>                             | this work; SMR5223 x P1 (SMR20467)                     | SMR21948 |
| MG1655 <i>ilvG<sup>+</sup> rfb<sup>+</sup> rph-1</i><br>$\Delta$ ( <i>ynaJ-ttcA</i> )<br>$\Delta$ <i>recA::FRTKanFRT</i>                                                                                                                 | this work; SMR816 x P1 (SMR20475)                      | SMR23077 |
| MG1655 <i>ilvG<sup>+</sup> rfb<sup>+</sup> rph-1</i><br>$\Delta$ ( <i>ynaJ-ttcA</i> )<br>$\Delta$ <i>recB::FRTKanFRT</i>                                                                                                                 | this work; SMR816 x P1 (SMR20467)                      | SMR23079 |
| MG1655 <i>ilvG<sup>+</sup> rfb<sup>+</sup> rph-1</i><br>$\Delta$ ( <i>ynaJ-ttcA</i> )<br>$\Delta$ <i>rpoS::FRTKanFRT</i>                                                                                                                 | this work; SMR816 x P1 (SMR20479)                      | SMR23081 |
| MG1655 <i>ilvG<sup>+</sup> rfb<sup>+</sup> rph-1</i><br>$\Delta$ ( <i>ynaJ-ttcA</i> ) <i>ruvC53eda-51::Tn10</i>                                                                                                                          | this work; SMR816 x P1 (RDK2615)                       | SMR23087 |
| MG1655 <i>ilvG<sup>+</sup> rfb<sup>+</sup> rph-1</i><br>$\Delta$ ( <i>ynaJ-ttcA</i> ) ( $\lambda$ <i>clts857 xis1</i> )<br>$\Delta$ <i>att<math>\lambda</math>::ampRC</i><br>$\Delta$ <i>ampD::FRTKanFRT</i>                             | this work; SMR5223 x P1 (JW0106)                       | SMR23097 |
| MG1655 <i>ilvG<sup>+</sup> rfb<sup>+</sup> rph-1</i><br>$\Delta$ ( <i>ynaJ-ttcA</i> ) ( $\lambda$ <i>clts857 xis1</i> )<br>$\Delta$ <i>att<math>\lambda</math>::ampRC ampD(D29G)</i>                                                     | this work; spontaneous SMR5223 Amp <sup>R</sup> mutant | SMR23099 |
| MG1655 <i>ilvG<sup>+</sup> rfb<sup>+</sup> rph-1</i><br>$\Delta$ ( <i>ynaJ-ttcA</i> ) ( $\lambda$ <i>clts857 xis1</i> )<br>$\Delta$ <i>att<math>\lambda</math>::ampRC ampD(D116T)</i>                                                    | this work; spontaneous SMR5223 Amp <sup>R</sup> mutant | SMR23100 |
| MG1655 <i>ilvG<sup>+</sup> rfb<sup>+</sup> rph-1</i><br>$\Delta$ ( <i>ynaJ-ttcA</i> ) ( $\lambda$ <i>clts857 xis1</i> )<br>$\Delta$ <i>att<math>\lambda</math>::ampRC</i> $\Delta$ ( <i>srl-recA</i> )306::Tn10 <i>ampD::IS4</i>         | this work; spontaneous SMR5223 Amp <sup>R</sup> mutant | SMR23101 |
| MG1655 <i>ilvG<sup>+</sup> rfb<sup>+</sup> rph-1</i><br>$\Delta$ ( <i>ynaJ-ttcA</i> ) ( $\lambda$ <i>clts857 xis1</i> )<br>$\Delta$ <i>att<math>\lambda</math>::ampRC</i> $\Delta$ ( <i>srl-recA</i> )306::Tn10 <i>ampD::IS4</i>         | this work; spontaneous SMR5223 Amp <sup>R</sup> mutant | SMR23102 |
| MG1655 <i>ilvG<sup>+</sup> rfb<sup>+</sup> rph-1</i><br>$\Delta$ ( <i>ynaJ-ttcA</i> ) ( $\lambda$ <i>clts857 xis1</i> )<br>$\Delta$ <i>att<math>\lambda</math>::ampRC</i> $\Delta$ <i>recB::FRT</i>                                      | This work; SMR21948 x pCP20, shifted to 37°C           | SMR23103 |
| MG1655 <i>ilvG<sup>+</sup> rfb<sup>+</sup> rph-1</i><br>$\Delta$ ( <i>ynaJ-ttcA</i> ) ( $\lambda$ <i>clts857 xis1</i> )<br>$\Delta$ <i>att<math>\lambda</math>::ampRC</i> $\Delta$ <i>recB::FRT</i><br>$\Delta$ <i>ampD::FRTKanFRT</i>   | this work; SMR23103 x P1 (JW0106)                      | SMR23104 |
| MG1655 <i>ilvG<sup>+</sup> rfb<sup>+</sup> rph-1</i><br>$\Delta$ ( <i>ynaJ-ttcA</i> ) ( $\lambda$ <i>clts857 xis1</i> )<br>$\Delta$ <i>att<math>\lambda</math>::ampRC</i> $\Delta$ <i>dinB50::FRT</i>                                    | this work; SMR11640 x pCP20, shifted to 37°C           | SMR23106 |
| MG1655 <i>ilvG<sup>+</sup> rfb<sup>+</sup> rph-1</i><br>$\Delta$ ( <i>ynaJ-ttcA</i> ) ( $\lambda$ <i>clts857 xis1</i> )<br>$\Delta$ <i>att<math>\lambda</math>::ampRC</i> $\Delta$ <i>dinB50::FRT</i><br>$\Delta$ <i>ampD::FRTKanFRT</i> | this work; SMR23106 x P1 (JW0106)                      | SMR23107 |
| MG1655 <i>ilvG<sup>+</sup> rfb<sup>+</sup> rph-1</i><br>$\Delta$ ( <i>ynaJ-ttcA</i> ) ( $\lambda$ <i>clts857 xis1</i> )<br>$\Delta$ <i>att<math>\lambda</math>::ampRC</i> $\Delta$ <i>rpoS::FRT</i>                                      | this work; SMR11641 x pCP20, shifted to 37°C           | SMR23112 |



|                                                                                                                                                                                                                                                                                         |                                    |          |
|-----------------------------------------------------------------------------------------------------------------------------------------------------------------------------------------------------------------------------------------------------------------------------------------|------------------------------------|----------|
| MG1655 <i>ilvG<sup>+</sup> rfb<sup>+</sup> rph-1</i><br>$\Delta(\text{ynaJ-ttcA})$ ( $\lambda$ <i>clts857 xis1</i> )<br>$\Delta\text{att}\lambda::\text{ampRC}$ $\Delta\text{rpoS}::\text{FRT}$<br>$\Delta\text{ampD}::\text{FRTKanFRT}$                                                | this work; SMR23112 x P1 (JW0106)  | SMR23113 |
| MG1655 <i>ilvG<sup>+</sup> rfb<sup>+</sup> rph-1</i><br>$\Delta(\text{ynaJ-ttcA})$ ( $\lambda$ <i>clts857 xis1</i> )<br>$\Delta\text{att}\lambda::\text{ampRC}$ <i>ruvC53eda-51::Tn10</i><br>$\Delta\text{ampD}::\text{FRTKanFRT}$                                                      | this work; SMR23990 x P1 (JW0106)  | SMR23120 |
| MG1655 <i>ilvG<sup>+</sup> rfb<sup>+</sup> rph-1</i><br>$\Delta(\text{ynaJ-ttcA})$ ( $\lambda$ <i>clts857 xis1</i> )<br>$\Delta\text{att}\lambda::\text{ampRC}$<br>$\Delta\text{umuDC595}::\text{cat}$                                                                                  | this work; SMR5223 x P1 (RW120)    | SMR23925 |
| MG1655 <i>ilvG<sup>+</sup> rfb<sup>+</sup> rph-1</i><br>$\Delta(\text{ynaJ-ttcA})$ ( $\lambda$ <i>clts857 xis1</i> )<br>$\Delta\text{att}\lambda::\text{ampRC}$<br>$\Delta\text{ruvC}::\text{FRTKanFRT}$                                                                                | this work; SMR5223 x P1 (JW1852)   | SMR23928 |
| MG1655 $\Delta\text{umuDC595}::\text{cat}$                                                                                                                                                                                                                                              | this work; SMR15482 x P1 (RW120)   | SMR23930 |
| MG1655 <i>ilvG<sup>+</sup> rfb<sup>+</sup> rph-1</i><br>$\Delta(\text{ynaJ-ttcA})$ ( $\lambda$ <i>clts857 xis1</i> )<br>$\Delta\text{att}\lambda::\text{ampRC}$ $\Delta\text{polB}::\text{Spec}^R$                                                                                      | this work; SMR5223 x P1 (RTC0003)  | SMR23957 |
| MG1655 <i>ilvG<sup>+</sup> rfb<sup>+</sup> rph-1</i><br>$\Delta(\text{ynaJ-ttcA})$ ( $\lambda$ <i>clts857 xis1</i> )<br>$\Delta\text{att}\lambda::\text{ampRC}$<br>$\Delta\text{dinB50}::\text{FRTKanFRT}$<br>$\Delta\text{polB}::\text{Spec}^R$                                        | this work; SMR11640 x P1 (RTC0003) | SMR23959 |
| MG1655 <i>ilvG<sup>+</sup> rfb<sup>+</sup> rph-1</i><br>$\Delta(\text{ynaJ-ttcA})$ ( $\lambda$ <i>clts857 xis1</i> )<br>$\Delta\text{att}\lambda::\text{ampRC}$<br>$\Delta\text{dinB50}::\text{FRTKanFRT}$<br>$\Delta\text{polB}::\text{Spec}^R$<br>$\Delta\text{umuDC595}::\text{cat}$ | this work; SMR23959 x P1 (RW120)   | SMR23962 |
| MG1655<br>$\Delta\text{slmA}::\text{FRTKanFRT}$                                                                                                                                                                                                                                         | this work; SMR15482 x P1 (JW16141) | SMR23966 |
| MG1655 <i>ilvG<sup>+</sup> rfb<sup>+</sup> rph-1</i><br>$\Delta(\text{ynaJ-ttcA})$ ( $\lambda$ <i>clts857 xis1</i> )<br>$\Delta\text{att}\lambda::\text{ampRC}$<br>$\Delta\text{slmA}::\text{FRTKanFRT}$                                                                                | this work; SMR5223 x P1 (JW16141)  | SMR23968 |
| MG1655 $\Delta\text{sulA}::\text{FRTcatFRT}$<br>$\Delta\text{slmA}::\text{FRTKanFRT}$                                                                                                                                                                                                   | this work; SMR21774 x P1 (JW16141) | SMR23970 |
| MG1655 <i>ilvG<sup>+</sup> rfb<sup>+</sup> rph-1</i><br>$\Delta(\text{ynaJ-ttcA})$ ( $\lambda$ <i>clts857 xis1</i> )<br>$\Delta\text{att}\lambda::\text{ampRC}$<br>$\Delta\text{sulA}::\text{FRTcatFRT}$<br>$\Delta\text{slmA}::\text{FRTKanFRT}$                                       | this work; SMR21772 x P1 (JW16141) | SMR23972 |
| MG1655 $\Delta\text{polB}::\text{Spec}^R$                                                                                                                                                                                                                                               | this work; SMR15482 x P1 (RTC0003) | SMR23974 |
| MG1655<br>$\Delta\text{dinB50}::\text{FRTKanFRT}$<br>$\Delta\text{polB}::\text{Spec}^R$                                                                                                                                                                                                 | this work; SMR21321 x P1 (RTC0003) | SMR23980 |
| MG1655<br>$\Delta\text{dinB50}::\text{FRTKanFRT}$<br>$\Delta\text{polB}::\text{Spec}^R$<br>$\Delta\text{umuDC595}::\text{cat}$                                                                                                                                                          | this work; SMR23980 x P1 (RW120)   | SMR23982 |
| MG1655 <i>ruvC53eda-</i>                                                                                                                                                                                                                                                                | this work; SMR15482 x P1 (RDK2615) | SMR23984 |

|                                                                                                                                                                                                                                         |                                                 |          |
|-----------------------------------------------------------------------------------------------------------------------------------------------------------------------------------------------------------------------------------------|-------------------------------------------------|----------|
| 51::Tn10                                                                                                                                                                                                                                |                                                 |          |
| MG1655 $\Delta$ sulA::FRTcatFRT<br>ruvC53eda-51::Tn10                                                                                                                                                                                   | this work; SMR21774 x P1 (RDK2615)              | SMR23985 |
| MG1655<br>$\Delta$ slmA::FRTKanFRT<br>ruvC53eda-51::Tn10                                                                                                                                                                                | this work; SMR23966 x P1 RDK2615                | SMR23986 |
| MG1655 $\Delta$ sulA::FRTcatFRT<br>$\Delta$ slmA::FRTKanFRT<br>ruvC53eda-51::Tn10                                                                                                                                                       | this work; SMR23970 x P1 (RDK2615)              | SMR23987 |
| MG1655 <i>ilvG<sup>+</sup> rfb<sup>+</sup> rph-1</i><br>$\Delta$ ( <i>ynaJ-ttcA</i> ) ( $\lambda$ <i>clts857 xis1</i> )<br>$\Delta$ att $\lambda$ ::ampRC ruvC53eda-51::Tn10                                                            | this work; SMR5223 x P1 (RDK2615)               | SMR23990 |
| MG1655 <i>ilvG<sup>+</sup> rfb<sup>+</sup> rph-1</i><br>$\Delta$ ( <i>ynaJ-ttcA</i> ) ( $\lambda$ <i>clts857 xis1</i> )<br>$\Delta$ att $\lambda$ ::ampRC<br>$\Delta$ sulA::FRTcatFRT<br>ruvC53eda-51::Tn10                             | this work; SMR21772 x P1 (RDK2615)              | SMR23991 |
| MG1655 <i>ilvG<sup>+</sup> rfb<sup>+</sup> rph-1</i><br>$\Delta$ ( <i>ynaJ-ttcA</i> ) ( $\lambda$ <i>clts857 xis1</i> )<br>$\Delta$ att $\lambda$ ::ampRC<br>$\Delta$ slmA::FRTKanFRT<br>ruvC53eda-51::Tn10                             | this work; SMR23968 x P1 (RDK2615)              | SMR23992 |
| MG1655 <i>ilvG<sup>+</sup> rfb<sup>+</sup> rph-1</i><br>$\Delta$ ( <i>ynaJ-ttcA</i> ) ( $\lambda$ <i>clts857 xis1</i> )<br>$\Delta$ att $\lambda$ ::ampRC<br>$\Delta$ sulA::FRTcatFRT<br>$\Delta$ slmA::FRTKanFRT<br>ruvC53eda-51::Tn10 | this work; SMR23972 x P1 (RDK2615)              | SMR23993 |
| MG1655 <i>rpoS</i> ::Tn10                                                                                                                                                                                                               | this work; SMR15482 x P1 (ZK1268)               | SMR23998 |
| MG1655 <i>ilvG<sup>+</sup> rfb<sup>+</sup> rph-1</i><br>$\Delta$ ( <i>ynaJ-ttcA</i> ) ( $\lambda$ <i>clts857 xis1</i> )<br>$\Delta$ att $\lambda$ ::ampRC <i>rpoS</i> ::Tn10                                                            | this work; SMR5223 x P1 (ZK1268)                | SMR24000 |
| MG1655 <i>ilvG<sup>+</sup> rfb<sup>+</sup> rph-1</i><br>$\Delta$ ( <i>ynaJ-ttcA</i> ) ( $\lambda$ <i>clts857 xis1</i> )<br>$\Delta$ att $\lambda$ ::ampRC <i>lexA3</i><br><i>malB</i> ::Tn9 <i>rpoS</i> ::Tn10                          | this work; SMR11642 x P1 (ZK1268)               | SMR24002 |
| MG1655<br><i>lexA3 malB</i> ::Tn9 <i>rpoS</i> ::Tn10                                                                                                                                                                                    | this work; SMR21338 x P1 (ZK1268)               | SMR24004 |
| MG1655<br>$\Delta$ att $\lambda$ ::P <sub>sulAmCherry</sub><br>FRTcatFRT                                                                                                                                                                | This work; SMR15482 x P1 (SMR17962)             | SMR24021 |
| MG1655<br><i>yiaG-yfp</i> FRTcatFRT                                                                                                                                                                                                     | This work, SMR15482 x P1 (SMR10582)             | SMR24079 |
| MG1655 <i>yiaG-yfp</i> FRT                                                                                                                                                                                                              | this work; SMR24079 x pCP20,<br>shifted to 37°C | SMR24096 |
| MG1655 $\Delta$ att $\lambda$ ::P <sub>sulAmCherry</sub><br>FRT                                                                                                                                                                         | this work; SMR24021 x pCP20,<br>shifted to 37°C | SMR24100 |
| MG1655 <i>yiaG-yfp rpoS</i> ::Tn10                                                                                                                                                                                                      | this work; SMR24096 x P1 (ZK1268)               | SMR24134 |
| MG1655 $\Delta$ slmA::FRT                                                                                                                                                                                                               | this work; SMR23966 x pCP20,<br>shifted to 37°C | SMR24144 |
| MG1655 $\Delta$ att $\lambda$ ::P <sub>sulAmCherry</sub><br>FRT<br><i>lexA3 malB</i> ::Tn9                                                                                                                                              | this work; SMR24100 x P1 (SMR821)               | SMR24156 |

|                                                                                                                                                                    |                                                                                                                                                   |          |
|--------------------------------------------------------------------------------------------------------------------------------------------------------------------|---------------------------------------------------------------------------------------------------------------------------------------------------|----------|
| MG1655 <i>yiaG-mCherryFRTcatFRT</i>                                                                                                                                | this work; SMR15482 x lambda Red-mediated recombineering using pKD46 with <i>mCherryFRTcatFRT</i> from SMR17962 (primers: <i>yiaG-mCherrySH</i> ) | SMR24268 |
| MG1655 <i>yiaG-mCherryFRTcatFRT</i>                                                                                                                                | this work; SMR15482 x lambda Red-mediated recombineering using pKD46 with <i>mCherryFRTcatFRT</i> from SMR17962 (primers: <i>yiaG-mCherrySH</i> ) | SMR24270 |
| MG1655 <i>yiaG-mCherryFRTcatFRT rpoS::Tn10</i>                                                                                                                     | this work; SMR24268 x P1 (ZK1268)                                                                                                                 | SMR24312 |
| MG1655 <i>asnA::tetO array Gent<sup>R</sup></i>                                                                                                                    | this work; SMR15482 x P1 (DB2159)                                                                                                                 | SMR24699 |
| MG1655 <i>asnA::tetO array Gent<sup>R</sup> [pDB317]</i>                                                                                                           | this work; SMR24699 transformed with pDB317                                                                                                       | SMR24700 |
| MG1655 $\Delta$ <i>slmA::FRT</i> <i>asnA::tetO array Gent<sup>R</sup> [pDB317]</i>                                                                                 | this work; SMR24328 transformed with pDB317                                                                                                       | SMR24343 |
| MG1655 $\Delta$ <i>sulA::FRT</i> <i>asnA::tetO array Gent<sup>R</sup> [pDB317]</i>                                                                                 | this work; SMR24332 transformed with pDB317                                                                                                       | SMR24347 |
| MG1655 $\Delta$ <i>slmA::FRT</i> $\Delta$ <i>sulA::FRT</i> <i>asnA::tetO array Gent<sup>R</sup> [pDB317]</i>                                                       | this work; SMR24336 transformed with pDB317                                                                                                       | SMR24351 |
| MG1655 <i>gyrA(L83,Y87) zei-723::Tn10 parC(I80,G84) Kan<sup>R</sup> <math>\Delta</math>att<math>\lambda</math>::P<sub><i>sulA</i></sub><i>mCherryFRTcatFRT</i></i> | this work; SMR24600 x P1 (SMR17962)                                                                                                               | SMR24422 |
| MG1655 <i>yiaG-yfp FRT <math>\Delta</math>sulA::FRTcatFRT</i>                                                                                                      | this work; SMR24096 x P1 (DB2159)                                                                                                                 | SMR24430 |
| MG1655 <i>yiaG-yfp FRT <math>\Delta</math>slmA::FRTKanFRT</i>                                                                                                      | this work; SMR24096 x P1 (JW16141)                                                                                                                | SMR24433 |
| MG1655 <i>yiaG-yfp FRT <math>\Delta</math>hfq::FRTKanFRT</i>                                                                                                       | this work; SMR24096 x P1 (JW4130)                                                                                                                 | SMR24436 |
| MG1655 <i>gyrA(L83,Y87) zei-723::Tn10 parC(I80,G84) Kan<sup>R</sup> yiaG-yfp FRTcatFRT</i>                                                                         | this work; SMR24600 x P1 (SMR10582)                                                                                                               | SMR24439 |
| MG1655 [pNT3]                                                                                                                                                      | this work; SMR15482 conjugated with SMR19967                                                                                                      | SMR24450 |
| MG1655 [pNT3- <i>rpoS</i> ]                                                                                                                                        | this work; SMR15482 conjugated with AN2630                                                                                                        | SMR24451 |
| MG1655 <i>yiaG-yfp FRT <math>\Delta</math>hfq::FRTKanFRT [pNT3]</i>                                                                                                | this work; SMR24436 conjugated with SMR19967                                                                                                      | SMR24452 |
| MG1655 <i>yiaG-yfp FRT <math>\Delta</math>hfq::FRTKanFRT [pNT3-<i>rpoS</i>]</i>                                                                                    | this work; SMR24436 conjugated with AN2630                                                                                                        | SMR24453 |
| MG1655 $\Delta$ <i>lacZ1::FRT</i> <i>att<math>\lambda</math>::pSJ501::katG'-lacZ<sup>+</sup> FRT</i>                                                               | this work; AL441 x pCP20, shifted to 37°C                                                                                                         | SMR24462 |
| MG1655 $\Delta$ <i>lacZ1::FRT</i> <i>att<math>\lambda</math>::pSJ501::katG'-lacZ<sup>+</sup> FRT</i> <i>ubiD::Tn10dCam</i>                                         | this work; SMR24462 x P1 (SMR11945)                                                                                                               | SMR24466 |
| MG1655 $\Delta$ <i>araBAD567</i>                                                                                                                                   | this work; SMR21124 x P1 (SMR10582)                                                                                                               | SMR24476 |

|                                                                                                                                                       |                                                         |          |
|-------------------------------------------------------------------------------------------------------------------------------------------------------|---------------------------------------------------------|----------|
| $\Delta att\lambda::P_{BAD}$<br><i>zfd2509.2::P<sub>N25tetR</sub> FRT</i><br>$\Delta attTn7::FRT$<br>$P_{N25tetO}gamGFP$<br><i>yiaG-yfp FRTcatFRT</i> |                                                         |          |
| MG1655 <i>yiaG-yfp</i><br>$\Delta rpoS::FRTKanFRT$                                                                                                    | this work; SMR24096 x P1 (JW5437)                       | SMR24498 |
| MG1655 $\Delta lacX74$<br>$\lambda_{imm21}rpoS750-lacZ$<br>$\Delta arcZ::FRTKanFRT$                                                                   | this work; SG30013 x P1 (SMR17806)                      | SMR24516 |
| MG1655 $\Delta lacX74$<br>$\lambda_{imm21}rpoS750-lacZ$<br>$\Delta dsrA101::FRTcatFRT$                                                                | this work; SG30013 x P1 (SMR20183)                      | SMR24520 |
| MG1655 $\Delta lacX74$<br>$\lambda_{imm21}rpoS750-lacZ$<br>$\Delta rprA101::FRTcatFRT$                                                                | this work; SG30013 x P1 (SMR20181)                      | SMR24524 |
| MG1655 $\Delta lacX74$<br>$\lambda_{imm21}rpoS750-lacZ$<br><i>ubiD::Tn10dCam</i>                                                                      | this work; SG30013 x P1 (SMR11945)                      | SMR24539 |
| MG1655 $\Delta lacX74$<br>$\lambda_{imm21}rpoS750-lacZ$<br>$\Delta arcZ::FRTKanFRT$<br>$\Delta dsrA101::FRTcatFRT$                                    | this work; SMR24516 x P1 (SMR20183)                     | SMR24542 |
| MG1655 $\Delta lacX74$<br>$\lambda_{imm21}rpoS750-lacZ$<br>$\Delta hfq::FRTKanFRT$                                                                    | this work; SG30013 x P1 (JW4130)                        | SMR24546 |
| MG1655 <i>yiaG-yfp FRT</i><br><i>lexA3 malB::Tn9</i>                                                                                                  | this work; SMR24096 x P1 (SMR821)                       | SMR24561 |
| MG1655 <i>yiaG-yfp FRT</i><br>$\Delta recB::FRTKanFRT$                                                                                                | this work; SMR24096 x P1 (JW2788)                       | SMR24563 |
| MG1655<br><i>gyrA(L83,Y87) zei-723::Tn10</i>                                                                                                          | this study; SMR15482 x P1 (SKM11)                       | SMR24598 |
| MG1655<br><i>gyrA(L83,Y87) zei-723::Tn10</i><br><i>parC(I80,G84) Kan<sup>R</sup></i>                                                                  | this work; SMR24598 x P1 (SKM16)                        | SMR24600 |
| MG1655 <i>rpoB(A1687C)</i>                                                                                                                            | this work; spontaneous SMR15482 Rif <sup>R</sup> mutant | SMR24603 |
| MG1655 <i>rpoB(A1687C)</i><br>$\Delta recA::FRTKanFRT$                                                                                                | this work; SMR24603 x P1 (SMR20475)                     | SMR24604 |
| MG1655 <i>rpoB(A1687C)</i><br>$\Delta recB::FRTKanFRT$                                                                                                | this work; SMR24603 x P1 (SMR20467)                     | SMR24606 |
| MG1655 <i>rpoB(A1687C)</i><br>$\Delta dinB50::FRTKanFRT$                                                                                              | this work; SMR24603 x P1 (SMR5880)                      | SMR24608 |
| MG1655 <i>rpoB(A1687C)</i><br>$\Delta rpoS::FRTKanFRT$                                                                                                | this work; SMR24603 x P1 (SMR20479)                     | SMR24612 |
| MG1655 <i>rpoB(A1687C)</i><br>$\Delta ruvC::FRTKanFRT$                                                                                                | this work; SMR24603 x P1 (SMR20477)                     | SMR24620 |
| MG1655<br><i>rpoB(Δ1593–1598)</i>                                                                                                                     | this work; spontaneous SMR15482 Rif <sup>R</sup> mutant | SMR24626 |
| MG1655<br><i>rpoB(Δ1593–1598)</i><br>$\Delta recA::FRTKanFRT$                                                                                         | this work; SMR24626 x P1 (SMR20475)                     | SMR24627 |
| MG1655<br><i>rpoB(Δ1593–1598)</i><br>$\Delta recB::FRTKanFRT$                                                                                         | this work; SMR24626 x P1 (SMR20467)                     | SMR24629 |

|                                                                                                                                                                                                                            |                                                         |          |
|----------------------------------------------------------------------------------------------------------------------------------------------------------------------------------------------------------------------------|---------------------------------------------------------|----------|
| MG1655<br><i>rpoB</i> ( $\Delta$ 1593–1598)<br>$\Delta$ <i>dinB50</i> ::FRTKanFRT                                                                                                                                          | this work; SMR24626 x P1 (SMR5880)                      | SMR24631 |
| MG1655<br><i>rpoB</i> ( $\Delta$ 1593–1598)<br>$\Delta$ <i>rpoS</i> ::FRTKanFRT                                                                                                                                            | this work; SMR24626 x P1 (SMR20479)                     | SMR24635 |
| MG1655<br><i>rpoB</i> ( $\Delta$ 1593–1598)<br>$\Delta$ <i>ruvC</i> ::FRTKanFRT                                                                                                                                            | this work; SMR24626 x P1 (SMR20477)                     | SMR24643 |
| MG1655 <i>rpoB</i> (A1547T)                                                                                                                                                                                                | this work; spontaneous SMR15482 Rif <sup>R</sup> mutant | SMR24649 |
| MG1655 <i>rpoB</i> (A1547T)<br>$\Delta$ <i>recA</i> ::FRTKanFRT                                                                                                                                                            | this work; SMR24649 x P1 (SMR20475)                     | SMR24650 |
| MG1655 <i>rpoB</i> (A1547T)<br>$\Delta$ <i>recB</i> ::FRTKanFRT                                                                                                                                                            | this work; SMR24649 x P1 (SMR20467)                     | SMR24652 |
| MG1655 <i>rpoB</i> (A1547T)<br>$\Delta$ <i>dinB50</i> ::FRTKanFRT                                                                                                                                                          | this work; SMR24649 x P1 (SMR5880)                      | SMR24654 |
| MG1655 <i>rpoB</i> (A1547T)<br>$\Delta$ <i>rpoS</i> ::FRTKanFRT                                                                                                                                                            | this work; SMR24649 x P1 (SMR20479)                     | SMR24658 |
| MG1655 <i>rpoB</i> (A1547T)<br>$\Delta$ <i>ruvC</i> ::FRTKanFRT                                                                                                                                                            | this work; SMR24649 x P1 (SMR20477)                     | SMR24666 |
| MG1655 <i>ilvG</i> + <i>rfbB</i> + <i>rph-1</i><br>$\Delta$ ( <i>ynaJ</i> - <i>ttcA</i> ) ( $\lambda$ <i>clts857 xis1</i> )<br>$\Delta$ <i>att<math>\lambda</math></i> :: <i>ampRC</i><br>$\Delta$ <i>nuoC</i> ::FRTKanFRT | this work; SMR5223 x P1 (SMR12140)                      | SMR24672 |
| MG1655 <i>ilvG</i> + <i>rfbB</i> + <i>rph-1</i><br>$\Delta$ ( <i>ynaJ</i> - <i>ttcA</i> ) ( $\lambda$ <i>clts857 xis1</i> )<br>$\Delta$ <i>att<math>\lambda</math></i> :: <i>ampRC</i><br><i>cyoD</i> ::Tn10dCam           | this work; SMR5223 x P1 (JW0419)                        | SMR24674 |
| MG1655 <i>ilvG</i> + <i>rfb</i> + <i>rph-1</i><br>$\Delta$ ( <i>ynaJ</i> - <i>ttcA</i> ) ( $\lambda$ <i>clts857 xis1</i> )<br>$\Delta$ <i>att<math>\lambda</math></i> :: <i>ampRC</i><br><i>ubiD</i> ::Tn10dCam            | this work; SMR5223 x P1 (SMR11945)                      | SMR24676 |
| MG1655<br>$\Delta$ <i>nuoC</i> ::FRTKanFRT                                                                                                                                                                                 | this work; SMR15482 x P1 (SMR12140)                     | SMR24678 |
| MG1655 <i>cyoD</i> ::Tn10dCam                                                                                                                                                                                              | this work; SMR15482 x P1 (SMR11930)                     | SMR24680 |
| MG1655 <i>ubiD</i> ::Tn10dCam                                                                                                                                                                                              | this work; SMR15482 x P1 (SMR11945)                     | SMR24682 |
| MG1655 <i>ubiD</i> ::Tn10dCam<br>[pNT3]                                                                                                                                                                                    | this work; SMR24682 conjugated with SMR19967            | SMR24684 |
| MG1655 <i>ubiD</i> ::Tn10dCam<br>[pNT3- <i>rpoS</i> ]                                                                                                                                                                      | this work; SMR24682 conjugated with A.N. 2630           | SMR24686 |
| MG1655 <i>yiaG-yfp</i> FRT<br>$\Delta$ <i>arcZ</i> ::FRTKanFRT                                                                                                                                                             | this work; SMR24096 x P1 (SMR17806)                     | SMR24688 |
| MG1655 <i>yiaG-yfp</i> FRT<br>$\Delta$ <i>dsrA101</i> ::FRT <i>cam</i> FRT                                                                                                                                                 | this work; SMR24096 x P1 (SMR20183)                     | SMR24690 |
| MG1655 <i>yiaG-yfp</i> FRT<br>$\Delta$ <i>rprA101</i> ::FRT <i>cat</i> FRT                                                                                                                                                 | this work; SMR24096 x P1 (SMR20181)                     | SMR24692 |
| MG1655 <i>yiaG-yfp</i> FRT<br>$\Delta$ <i>dsrA101</i> ::FRT                                                                                                                                                                | this work; SMR24690 x pCP20, shifted to 37°C            | SMR24694 |
| MG1655 <i>yiaG-yfp</i> FRT<br>$\Delta$ <i>dsrA101</i> ::FRT<br>$\Delta$ <i>arcZ</i> ::FRTKanFRT                                                                                                                            | this work; SMR24694 x P1 (SMR17806)                     | SMR24695 |
| MG1655 <i>yiaG-yfp</i> FRT<br>$\Delta$ <i>sulA</i> ::FRT <i>cat</i> FRT<br>$\Delta$ <i>slmA</i> ::FRTKanFRT                                                                                                                | this work; SMR24430 x P1 (JW16141)                      | SMR24703 |

|                                                                                                                                   |                                                                |          |
|-----------------------------------------------------------------------------------------------------------------------------------|----------------------------------------------------------------|----------|
| MG1655 $\Delta att\lambda::P_{sulAmCherry}$<br>FRT<br><i>ubiD::Tn10dCam</i>                                                       | this work; SMR24100 x P1 (SMR11945)                            | SMR24705 |
| MG1655<br><i>rpoB</i> ( $\Delta 1593-1598$ ) [pNT3]                                                                               | this work; SMR24626 conjugated with SMR19967                   | SMR24707 |
| MG1655<br><i>rpoB</i> ( $\Delta 1593-1598$ ) [pNT3- <i>rpoS</i> ]                                                                 | this work; SMR24626 conjugated with A.N. 2630                  | SMR24708 |
| MG1655<br><i>rpoB</i> ( $\Delta 1593-1598$ )<br><i>ubiD::Tn10dCam</i>                                                             | this work; SMR24626 x P1 (SMR11945)                            | SMR24709 |
| MG1655 <i>rpoB</i> ( $\Delta 1593-1598$ )<br>$\Delta hfq::FRTKanFRT$                                                              | this work; SMR24626 x P1 (JW4130)                              | SMR24710 |
| MG1655 <i>rpoB</i> ( $\Delta 1593-1598$ )<br><i>gyrA</i> (L83,Y87) <i>zei-723::Tn10</i>                                           | this work; SMR24626 x P1 (SKM11)                               | SMR24713 |
| MG1655 <i>rpoB</i> ( $\Delta 1593-1598$ )<br><i>gyrA</i> (L83,Y87) <i>zei-723::Tn10</i><br><i>parC</i> (I80,G84) Kan <sup>R</sup> | this work; SMR24713 x P1 (SMR24597)                            | SMR24714 |
| MG1655 <i>rpoB</i> ( $\Delta 1593-1598$ )<br>$\Delta hfq::FRTKanFRT$ [pNT3]                                                       | this work; SMR24710 conjugated with SMR19967                   | SMR24711 |
| MG1655 <i>rpoB</i> ( $\Delta 1593-1598$ )<br>$\Delta hfq::FRTKanFRT$ [pNT3- <i>rpoS</i> ]                                         | this work; SMR24710 conjugated with A.N. 2630                  | SMR24712 |
| MG1655 <i>yiaG-yfp</i> FRT<br><i>ubiD::Tn10dCam</i>                                                                               | this work; SMR24096 x P1 (SMR11945)                            | SMR24725 |
| MG1655 [P <sub>vector-gfp</sub> ]                                                                                                 | this work; SMR15482 transformed with pUA66                     | SMR24842 |
| MG1655 [P <sub>oxyR-gfp</sub> ]                                                                                                   | this work; SMR15482 transformed with pUA66- <i>oxyR-gfp</i>    | SMR24843 |
| MG1655 [P <sub>sodA-gfp</sub> ]                                                                                                   | this work; SMR15482 transformed with pUA66- <i>sodA-gfp</i>    | SMR24844 |
| MG1655 <i>yiaG-mCherryFRTcatFRT</i> [P <sub>vector-gfp</sub> ]                                                                    | this work; SMR24270 transformed with pUA66                     | SMR24847 |
| MG1655 <i>yiaG-mCherryFRTcatFRT</i> [P <sub>oxyR-gfp</sub> ]                                                                      | this work; SMR24270 transformed with P <sub>oxyR-gfp</sub>     | SMR24848 |
| MG1655 <i>yiaG-mCherryFRTcatFRT</i> [P <sub>sodA-gfp</sub> ]                                                                      | this work; SMR24270 transformed with pUA66- <i>sodA-gfp</i>    | SMR24849 |
| MG1655 <i>yiaG-mCherryFRTcatFRT</i><br><i>rpoS::Tn10</i> [P <sub>vector-gfp</sub> ]                                               | this work; SMR24312 transformed with pUA66                     | SMR24852 |
| MG1655 <i>yiaG-mCherryFRTcatFRT</i><br><i>rpoS::Tn10</i> [P <sub>oxyR-gfp</sub> ]                                                 | this work; SMR24312 transformed with pUA66- <i>oxyR-gfp</i>    | SMR24853 |
| MG1655 <i>yiaG-mCherryFRTcatFRT</i><br><i>rpoS::Tn10</i> [P <sub>sodA-gfp</sub> ]                                                 | this work; SMR24312 transformed with pUA66- <i>sodA-gfp</i>    | SMR24854 |
|                                                                                                                                   |                                                                |          |
| <b>Sequence-Based Reagents</b>                                                                                                    |                                                                |          |
| primers                                                                                                                           |                                                                |          |
| <i>rpoB</i> cluster I - FWD<br>REV                                                                                                | GAC AGA TGG GTC GAC TTG TCA G<br>AGG TGG TCG ATA TCA TCG ACT T |          |
| <i>rpoB</i> cluster I - Sequencing                                                                                                | GAA GGC ACC GTA AAA GAC AT                                     |          |
| <i>rpoB</i> cluster II - FWD                                                                                                      | TCG AAG GTT CCG GTA TCC TGA G                                  |          |

|                                     |                                          |  |
|-------------------------------------|------------------------------------------|--|
| REV                                 | GGA TAC ATC TCG TCT TCG TTA AC           |  |
| <i>rpoB</i> cluster II - Sequencing | CGT GTA GAG CGT GCG GTG AAA              |  |
| <i>ampD</i> - FWD                   | GTC GGG TGT CAG GGT TAT AG               |  |
| REV                                 | CGC TTC AAG ACG ATG ATC AAG              |  |
| <i>ampD</i> - Sequencing            | ATA AGG TAG AAA CAT GCT ACT CT           |  |
| <i>yiaG-mCherry</i> SH – FWD        | CCCGGCATTAAGTAAGCAGTTGATGGAATAGACTTTTAT  |  |
| REV                                 | CATG GTTCCAAGGGCGAGGA                    |  |
|                                     | GCGGGTGATGCAACAATTATTTTTCATATTTATGATTAAT |  |
|                                     | GTG TAGGCTGGAGCTGCTTC                    |  |

1155  
1156  
1157

## CONTACT FOR REAGENTS AND RESOURCE SHARING

1158 The corresponding author, Susan M. Rosenberg ([smr@bcm.edu](mailto:smr@bcm.edu)), is the contact for reagents and  
1159 resource sharing.  
1160

1161

## EXPERIMENTAL MODEL AND SUBJECT DETAILS

1162 *Escherichia coli* (strain MG1655) and isogenic derivatives were used for all experiments.  
1163

1164

## METHODS DETAILS

1165

### Strains, Media, and Growth

1166 The Key Resources Table lists strains used in this study. Bacteria were grown in LBH rich  
1167 medium (Torkelson et al., 1997) at 37°C with aeration, and additives where indicated at the  
1168 following concentrations: ciprofloxacin (cipro, 1–24 ng/mL, [Table S1](#)), ampicillin (100 µg/ml),  
1169 chloramphenicol (25 µg/ml), kanamycin (50 µg/ml), tetracycline (10 µg/ml), rifampicin (110 µg/ml),  
1170 and sodium citrate (20 mM).  
1171  
1172

1173

### Assays for Ciprofloxacin-induced Mutagenesis

1174 Saturated overnight LBH cultures, started each from a single colony, were diluted 1:4x10<sup>6</sup> into  
1175 25 ml in a 250ml flask in fresh LBH broth and incubated at 37°C with shaking for 3–3.5 h, then  
1176 diluted 1:3 into fresh LBH broth (“no-cipro” controls) or into LBH with cipro at a final “sub-inhibitory”  
1177 concentration minimal antibiotic concentration (MAC) that caused a final cfu titer of 10% of the  
1178 titer observed in the no-cipro control, by the final 24h or 48h time point (fluctuation tests, below).  
1179 This concentration was determined individually for each experimental strain. For dose-response  
1180 fluctuation tests, the final cipro concentrations were 1, 2, 4, 8.5, and 12 ng/ml.  
1181

1182 For all fluctuation tests, between 10 and 60 1-ml aliquots of cultures diluted 1:3 were  
1183 dispensed into 96-deep-well plates or 14-ml tubes and incubated at 37°C with shaking. After 24h  
1184 (Rif<sup>R</sup>) or 48h incubation (Amp<sup>R</sup>), samples were plated onto LBH agar for determination of total  
1185 viable cell titers or selective LBH-agar plates containing rifampicin (110 µg/ml) or ampicillin (100  
1186 µg/ml) to select mutants resistant to each drug. Total and resistant cfu were counted, and mutation  
1187 rates (mutations per cell per generation) estimated with the MSS-MLE algorithm using the  
1188 FALCOR calculator (Hall et al., 2009). The fold change in cipro-induced mutagenesis for each  
1189 strain was determined as the ratio of the mutation rates of the treated divided by the untreated  
1190 control samples.

1191 For fluctuation tests performed with addition of reagents that reduce reactive oxygen, the  
1192 final concentrations were 100 mM for thiourea, 0.25 mM for 2,2'-bipyridine, and 100 µM for  
1193 edaravone. For assays in which GamGFP was produced to trap double-strand breaks (DSBs)  
1194 (Shee et al., 2013), GamGFP was induced from the chromosome using 10 and 20 ng/mL

1195 doxycycline in LBH liquid or in plates, as used for determining cfu/ml. Plasmids for  $\sigma^S$  artificial  
1196 upregulation and the empty-vector control were obtained from the mobile plasmid collection (Saka  
1197 et al., 2005), and were induced with 30  $\mu$ M isopropyl  $\beta$ -D-1-thiogalactopyranoside (IPTG) present  
1198 throughout growth, except in the plates used to determine Rif<sup>R</sup> or total cfu/ml.  $\sigma^S$  production was  
1199 confirmed by western blotting.

1200

### 1201 **Reconstruction Experiments**

1202 Reconstruction experiments were performed to verify that differences in cipro-induced mutant cfu  
1203 titers observed between wild-type and various mutant strains were not caused by differences in  
1204 colony-formation efficiency under exact reconstructions of selection conditions: selective plates  
1205 with varying amounts of isogenic sensitive neighbor cells ( $10^8$  or  $10^9$ ). About 100 cfu of ampicillin-  
1206 resistant *amp<sup>R</sup>RC  $\Delta$ ampD* cells or rifampicin-resistant *rpoB* A1687C, *rpoB*  $\Delta$ 1593–1598, *rpoB*  
1207 A1547T mutant cells of each experimental strain genotype were mixed with  $\sim 10^9$ ,  $\sim 10^8$  or  $\sim 10^7$   
1208 isogenic sensitive neighbor cells and plated onto ampicillin or rifampicin selective plates,  
1209 respectively, and their numbers and speed of forming colonies scored. These platings reconstruct  
1210 the experimental conditions in which mutant cells form colonies scored in our **Assays for**  
1211 **Ciprofloxacin-induced Mutagenesis**. Resistant mutants were also plated alone for reference.  
1212 For each strain, we quantified cfu observed after 24 h (ampicillin) or 48 h (rifampicin) at 37°C.  
1213 Two replicates for each culture condition were performed per strain. See figure legends for  
1214 numbers of independent experiments.

1215

### 1216 **Competition Experiments**

1217 Cultures of sensitive and resistant mutants of each experimental strain genotype were mixed at  
1218 a 50:50 ratio and grown per fluctuation tests, then plated at the end of the growth period on  
1219 selective rifampicin or ampicillin medium and non-selectively, to obtain the final ratios of sensitive  
1220 and resistant cfu after growth in competition. Pure cultures were also established as controls.  
1221 These experiments showed that neither Rif<sup>R</sup> nor Amp<sup>R</sup> mutants is selected (wins the competition  
1222 ending over 50% of cfu), and both are actually significantly counter-selected relative to their  
1223 sensitive parent strains (e.g., [Figure 1C](#) and legend). These data indicate that all of our estimates  
1224 of the induction of mutagenesis to Rif<sup>R</sup> and Amp<sup>R</sup> are underestimates. See figure legends for  
1225 number of independent experiments.

1226

### 1227 **Flow Cytometric Assays for $\sigma^S$ - and SOS-Response-Regulated Promoter Activity**

1228 Quantifications of cells that have induced their  $\sigma^S$  or SOS responses, and how much they have,  
1229 were achieved using engineered chromosomal fluorescence reporter genes and flow cytometry,  
1230 per (Nehring et al., 2015; Pennington and Rosenberg, 2007) for SOS, and per (Al Mamun et al.,  
1231 2012) for  $\sigma^S$ -response activation. We used the *yiaG-yfp*  $\sigma^S$ -response reporter (Al Mamun et al.,  
1232 2012) and the  $\Delta att\lambda::P_{sulA}mCherry$  SOS reporter (Pennington and Rosenberg, 2007) modified by  
1233 Nehring et al. (Nehring et al., 2015) in separate strains grown under fluctuation-test conditions as  
1234 described for **Assays for Ciprofloxacin-induced Mutagenesis**, with or without cipro, at  
1235 indicated concentration/s, and harvested the cells in late log phase or stationary phase. For  
1236 quantification, flow cytometry “gates” were calibrated, for SOS, using the negative-control SOS-  
1237 off *lexA*(Ind<sup>-</sup>), and SOS-response proficient cells, per (Pennington and Rosenberg, 2007) as the  
1238 dividing place between peaks of the bimodal distribution of SOS-proficient cells at which most  
1239 cells, diverge from the spontaneously SOS-induced fluorescent cell subpopulation, usually at  
1240 between 0.5% and 1% of cells for cells cultured in LBH broth. Essentially all SOS-non-inducible  
1241 *recA* or *lexA*Ind<sup>-</sup> cells fall below this gate ( $\sim 10^{-4}$  of them cross the gate). Cells that fell below this  
1242 gate (less fluorescence) were scored as SOS negative, and above the gate as SOS positive. For  
1243 the  $\sigma^S$  response, gates for  $\sigma^S$ -high activity cells were set to the point at which fewer than 0.5% of  
1244 cells with cipro but without the reporter gene were positive. At this gate fewer than  $10^{-3}$  of  $\Delta rpoS$   
1245 cells, which are deficient in  $\sigma^S$ -response induction, cross the gate and would be scored as positive.



1246 For all, the percent of the population that scored as positive is reported.

1247

### 1248 **Fluorescence-Activated Cell Sorting**

1249 Cell sorting was performed using a FACS Aria II cell sorter (BD Biosciences, San Jose, CA) with  
1250 a 70- $\mu$ m nozzle. *E. coli* cells were identified using forward and side scatter parameters, and these  
1251 were sorted using sterile 1X phosphate buffered saline (PBS) as sheath fluid. After treatment  
1252 with cipro, yellow fluorescent protein-positive ( $\sigma^S$  activity, *yiaG-yfp*) and non-fluorescent cells were  
1253 sorted into 14 mL conical tubes ( $20\text{-}30 \times 10^6$  negative cells and  $3\text{-}8 \times 10^6$  positive cells) and plated  
1254 on LB agar with and without rifampicin to determine cfu/mL (per **Assays for Ciprofloxacin-**  
1255 **induced Mutagenesis**, above). These data were used to calculate RifR mutant frequencies in  
1256 the sorted  $\sigma^S$  high-activity,  $\sigma^S$  low-activity, unsorted, and mock-sorted populations, the last being  
1257 cells run through the machine and all cells collected. Control sorts for cyan fluorescent protein,  
1258 encoded by the *P<sub>lac</sub>cfp* gene, a negative control for metabolically active cells, and mutagenesis  
1259 assays, were performed similarly in parallel with the experimental sorts.

1260

### 1261 **HPII Catalase Activity**

1262 HPII ( $\sigma^S$ -dependent catalase) activity was measured as described (Iwase et al., 2013). The viable  
1263 cell titers (cfu/mL) of cells growing in LBH broth were determined at appropriate time points in log  
1264 or stationary phase. HPI catalase was inactivated by heating 100  $\mu$ L culture aliquots at 55°C for  
1265 15 min. After inactivation, 100  $\mu$ L 30% H<sub>2</sub>O<sub>2</sub> and 1% Triton-X 100 (Sigma) were added. After an  
1266 additional 15 min incubation, the height of bubble formation was measured in millimeters. The  
1267 millimeters of bubbles were then normalized to cfu/mL of cells. Controls in  $\Delta$ *rpoS* cells  
1268 demonstrated that these assays report on  $\sigma^S$ -response-dependent catalase activity.

1269

### 1270 **Microscopy and Quantification of GamGFP (DSB) and TetR-mCherry (Chromosome) Foci**

1271 Cells containing the chromosomal inducible GamGFP cassette were diluted  $1:4 \times 10^6$  into 250mL  
1272 flasks and grown for 3 h. These were then diluted 1:3 in media with or without cipro (1-8.5 ng/ml).  
1273 GamGFP, a DNA DSB-specific binding protein that traps DSBs and inhibits their repair (Shee et  
1274 al., 2013), was induced in late log phase using 40 ng/mL of doxycycline. After 2 h of induction,  
1275 cells were fixed with 1% paraformaldehyde and placed at 4°C until microscopy images were taken.  
1276 Cells containing the inducible TetR-mCherry plasmids and the *tetO* chromosomal array were  
1277 diluted  $1:4 \times 10^6$  into 2.5 $\mu$ L into 10ml into 250mL flasks and grown for 3 h. These were then diluted 1:3  
1278 in media with or without cipro (MACs). The TetR-mCherry protein binds to the chromosomal *tetO*  
1279 array labeling *oriC*-proximal chromosomal units as red foci, and was induced in late log-phase  
1280 using 2  $\mu$ M of sodium salicylate. After 4h of induction, cells were fixed with 1% paraformaldehyde  
1281 and placed at 4°C until microscopy images were taken. Images were visualized with an inverted  
1282 DeltaVision Core Image Restoration Microscope (GE Healthcare) with a 100X UPlan S  
1283 Apochromat (numerical aperture, 1.4) objective lens (Olympus) and a CoolSNAP HQ2 camera  
1284 (Photometrics). Captured images for analysis were chosen randomly. The images were taken  
1285 with Z-stacks (0.15- $\mu$ m intervals) and then deconvoluted (DeltaVision SoftWoRx software) to  
1286 visualize the whole cell for precise and accurate quantification of foci per (Xia et al., 2016; Xia et  
1287 al., 2018). For each experiment, >400 cells were counted using ImageJ software (NIH) with visual  
1288 inspection from each independent experiment. Only foci that overlapped with DAPI DNA stain  
1289 were quantified ( $\geq 99\%$  of all foci).

1290

### 1291 **Live Cell Deconvolution Microscopy**

1292 Cells were grown as for **Assays for Ciprofloxacin-induced Mutagenesis**. At 8 hours after the  
1293 addition of ciprofloxacin (8.5 ng/mL), 4  $\mu$ L of culture were plated onto 35mm glass bottom cell  
1294 culture plates. An agar pad containing spent medium from replicate cultures (8.5 ng/mL cipro in  
1295 cells grown for 8h) was placed on top of the cells, and a glass cover slip placed over the agar pad  
1296 and sealed with silicon grease to limit evaporation. Images were taken every 1-2 hours for 12

1297 hours with an inverted DeltaVision Core Image Restoration Microscope (GE Healthcare) with a  
1298 100X UPlan S Apochromat (numerical aperture, 1.4) objective lens (Olympus) and a CoolSNAP  
1299 HQ2 camera (Photometrics). Captured images for analysis were randomly chosen. The images  
1300 were taken with Z-stacks (0.15- $\mu$ m intervals) and then deconvoluted (DeltaVision SoftWoRx  
1301 software) to visualize the whole cell. For each experiment, >250 cells were followed to track the  
1302 activation of the GFP (*PsodA-gfp* oxidative stress response) and mCherry ( $\sigma^S$  activity) using  
1303 ImageJ software (NIH) with visual inspection from each independent experiment.  
1304

### 1305 ***rpoB* and *ampD* Sequencing**

1306 A sole Rif<sup>R</sup> or Amp<sup>R</sup> colony was isolated from each of 24 cipro-treated or 24 control independent  
1307 cultures and the *rpoB* or *ampD* gene sequenced, respectively. Rif<sup>R</sup> *rpoB* mutations occur mostly  
1308 within two mutation clusters (Reynolds, 2000), and all isolated mutants contained mutations within  
1309 these two clusters. *ampD* loss of function mutations confer ampicillin resistance in our *E. coli*  
1310 assay strain due to the insertion of *Enterobacter cloacae ampRC* genes in the chromosome, as  
1311 previously described (Petrosino et al., 2002). The *rpoB* cluster I and II were amplified, as  
1312 described (Reynolds, 2000), see also **STAR METHODS RESOURCE TABLE** for primers  
1313 (Reynolds, 2000). The *ampD* gene was amplified using primers described in **STAR METHODS**  
1314 **RESOURCE TABLE**. All PCR fragments were subjected to Sanger sequencing (GeneWIZ,  
1315 Massachusetts) to identify insertions, deletions, and/or base substitutions in the *ampD* or *rpoB*  
1316 genes.  
1317

### 1318 **Western Blot Analyses of $\sigma^S$ Protein Levels**

1319 Western blots for quantification of  $\sigma^S$  protein levels in cultures were performed as described  
1320 (Barreto et al., 2016). Proteins were separated by SDS-PAGE and transferred to 200  
1321 polyvinylidene (PVDF) membranes (Amersham Biosciences), blocked with 2% blocking buffer,  
1322 and probed with polyclonal mouse anti- $\sigma^S$  antibody (1:700 dilution) (Neoclone) (85). Goat anti-  
1323 mouse antibody conjugated to Cy5 fluorescent dye (1:5000 dilution) (Amersham Biosciences)  
1324 was used to detect the antibody-bound  $\sigma^S$  protein. Fluorescence was quantified using a Typhoon  
1325 scanner, with a PMT of 500 and 670BP 30Cy5 emission filter, and the bands were quantified using  
1326 ImageJ software (NIH). Quantifications from three separate western blots for  $\sigma^S$  are reported,  
1327 each with band intensities normalized to the values from isogenic wild-type cells with no cipro  
1328 treatment run in parallel, and the means  $\pm$ SEM shown.  
1329

### 1330 **Beta-galactosidase Assays**

1331 Cells were grown as for **Assays for Ciprofloxacin-induced Mutagenesis** to equivalent ODs and  
1332 frozen at -20°C until assays were carried out. Determination of the  $\beta$ -galactosidase activity of the  
1333 *P<sub>arcZ</sub>-lacZ*, *P<sub>dsrA</sub>-lacZ*, *rpoS-lacZ*, and *katG-lacZ* fusions was accomplished using the standard  
1334 assay described by Miller (Miller, 1992), except that the assays were carried out in 96-well plates  
1335 to ease sample processing.  
1336

### 1337 **Flow Cytometric Detection of Intracellular ROS or GFP and $\sigma^S$ Activity in Single Cells**

1338 Cells were grown in the absence or presence of cipro MAC (8.5 ng/mL) to early-, late-log, and  
1339 stationary phase as for **Assays for Ciprofloxacin-induced Mutagenesis** (above). The ROS  
1340 measurement protocol was modified from Gutierrez et al. and Xia et al. (Gutierrez et al., 2013;  
1341 Xia et al., 2018). Cells were incubated with ROS-staining dye DHR123 (Invitrogen) for 30 min at  
1342 37°C in PBS. After washing twice with PBS buffer, flow cytometry analyses were performed  
1343 immediately. Positive gates for ROS-positive cells were set so that <0.5% of cells treated with  
1344 cipro without DHR dye were positive. For experiments in which ROS or GFP and  $\sigma^S$  activity were  
1345 measured, cells were grown in the absence or presence of cipro MAC (8.5ng/mL) or with 0.5mM  
1346 H<sub>2</sub>O<sub>2</sub> as for **Assays for Ciprofloxacin-induced Mutagenesis** (above), then harvested serially  
1347 from cultures at 4, 8, 12, 16, 24, and 48 hours for ROS detection using dihydrorhodamine 123

1348 (DHR), or at 12, 16, and 24 for hours for ROS detection using transcriptional fusions of the *oxyR*  
1349 and *sodA* promoters to GFP (Zaslaver et al., 2006). For ROS detection using DHR, cells  
1350 containing  $\sigma^S$ -activity reporter *yiaG-mCherry* were collected and ROS were detected as green  
1351 fluorescence, and  $\sigma^S$  activity as red fluorescence. For ROS detection using *PoxyR-gfp* and  
1352 *PsodA-gfp*, cells containing both  $\sigma^S$ -activity reporter *yiaG-mCherry* and plasmids carrying the  
1353 *PoxyR-gfp* or *PsodA-gfp* transcriptional fusions, or a promoterless *gfp* parental plasmid *Pvector-*  
1354 *gfp*, were maintained with 35 $\mu$ g/mL kanamycin, and used to detect both GFP and red  
1355 fluorescence. Single color controls were also collected at time points for spectral compensation.  
1356 For the *PoxyR-gfp* or *PsodA-gfp* transcriptional fusions, gates were drawn so that the  
1357 promoterless-*gfp* vector *Pvector-gfp* had < 0.5% GFP-positive cells.  $\sigma^S$  high-activity-cell gates  
1358 were drawn so that spontaneous  $\sigma^S$  activation in non-cipro-treated cells after growth (<0.5% of  
1359 cells without cipro) were positive, and wild-type cells without the chromosomal  $\sigma^S$ -response  
1360 reporter (autofluorescence) had fewer than 0.5% of their cipro treated cells scored as positive.  
1361

### 1362 **Mathematical Modeling of Cipro-Induced Multi-chromosome Cell Filaments**

1363 In our model, a population of microbes is exposed to severe external stress (e.g., antibiotics), and  
1364 two strategies are available: either growing into “filament” cells, that can contain multiple DNA  
1365 copies, or reproducing individually. We consider a case in which resistance to the external stress  
1366 can be acquired by a single mutation, with baseline rate  $\mu$ , and deleterious mutations occur at  
1367 many other loci, with the number of deleterious mutations per replication following a Poisson  
1368 distribution with average  $\lambda$ . We assume that during the external stress the basic mutation rates of  
1369 all cells (both  $\mu$  and  $\lambda$ ) increase  $A$ -Fold, and mutation  $\mu$  rates in filament cells are further increased  
1370  $B$ -fold relative to non-filament cells.

1371 We denote by  $s$  and  $\delta$  the selection coefficients against the external stress and each  
1372 deleterious mutation, respectively. We denote by  $I_a$  the level of adaptation to the external stress,  
1373 where  $I_a = \begin{cases} 1 & \text{adapted} \\ 0 & \text{not adapted} \end{cases}$ . The fitness (modeled here as the probability to replicate) of an  
1374 individual that possess  $n$  deleterious mutations is thus  $\omega(I_a, n) = (1 - s)^{1 - I_a} \cdot (1 - \delta)^n$ . In the  
1375 filament population, we assume that DNA copies in the same cell filament share gene products,  
1376 and that deleterious mutations are recessive. Once a genome copy within the filament acquires  
1377 the beneficial mutation that confers resistance to the major stress, it buds out of the filament, and  
1378 begins to duplicate regularly (in proportion to the number of deleterious mutations it possesses).

1379 We follow the two strategies for  $k$  replication cycles, starting from a population that doesn't  
1380 carry any deleterious mutations nor is adapted to the external stress. In the filament population  
1381 the cells duplicate their genome without dividing and have up to  $2^k$  DNA copies. Because the  
1382 populations begin without any deleterious mutations, we neglect filaments in which all DNA copies  
1383 share the same deleterious mutation. Therefore, the fitness of DNA copies in the filament  
1384 population is affected only by the external stress, while in the non-filament population the fitness  
1385 of each DNA copy (or cell) is affected both by the external stress and by the number of deleterious  
1386 mutations it carries. After  $k$  replication cycles the filaments divide to cells, each containing a single  
1387 DNA copy. We then compare the population size and fitness, the proportion of adapted individuals,  
1388 and the distribution of deleterious mutations, between the filament population and the non-  
1389 filament population.

1390 Parameter values in figure 7H:  $\lambda = 0.003$ ,  $\mu = 6 \cdot 10^{-7}$ ,  $\delta = 0.03$ ,  $A = 100$ ,  $k = 4$ . In the left  
1391 and middle panels we use  $B = 4$  and  $s = 0.9$ , whereas in the right panel  $B$  is the value on the x-  
1392 axis. The value  $B = 4$  is derived from empirical results presented in Figure 7G, in which we see  
1393 that during antibiotic stress the mutation rate of cells that do filament (WT) have a fold-increase  
1394 of ~4 relative to non-filamented cells.

1395 The model tests the effect of filaments on evolvability, where mutation serves as the  
1396 variation mechanism. However, if chromosomes in filaments also experience recombination, then

1397 the system corresponds to the case of Fitness-Associate Recombination (FAR) (Hadany and  
1398 Beker, 2003b) – the less fit chromosomes experience higher recombination rate than the fitter  
1399 ones. Previous work has shown that this mode of recombination results in increased mean fitness  
1400 and improved adaptability (Hadany and Beker, 2003a).

1401  
1402  
1403 Parameters:

1404 Beneficial mutation rate  $\sim Ber(\mu)$

1405 Deleterious mutation rate  $\sim Poisson(\lambda)$

1406  $A$  – stress-induced increase in mutation rate

1407  $B$  – filament cells fold increase in mutation rate relative to non-filament cells

1408  $s$  – selection coefficient of the antibiotic

1409  $\delta$  - selection coefficient of each deleterious mutation (multiplicative model)

1410  $k$  – number of replication cycles

1411

### 1412 **Measurement of High-Dose Cipro Antibiotic Activity**

1413 Cells were grown to log phase  $OD_{600} \sim 0.5$ , then cipro (1.5  $\mu\text{g}/\text{mL}$ ) with or without edaravone  
1414 (100 $\mu\text{M}$ ) was added, and cells were harvested 0.75, 1.25, 2.25, and 3 hours later to determine  
1415 cfu/mL. Cells were washed twice with PBS and then assayed for viable cfu.

1416

### 1417 **Nalidixic-Acid Test for Heritable Hypermutability**

1418 Tests for heritable mutator phenotype were as described (Torkelson et al., 1997). Ten  
1419 independent (different mutations in *rpoB*) cipro-induced Rif<sup>R</sup> mutant isolates were grown in  
1420 parallel with control wild-type (non-mutator) and *mutS* mismatch repair-defective (mutator) strains  
1421 each in duplicate independent cultures. 100 $\mu\text{L}$  of each saturated overnight culture was spread  
1422 onto an LBH agar plate. After 10 minutes, dry nalidixic acid powder was spotted onto each plate  
1423 using a capillary tube. The plates were incubated for 24 hours at 37°C, after which the number of  
1424 microcolonies in the zones of inhibition were counted, and compared with the positive (*mutS*) and  
1425 negative (isogenic wild-type) controls.

1426

### 1427 **Flow-Cytometric Detection of Dead Cells**

1428 Cells were grown in the presence of cipro MAC per **Assays for Ciprofloxacin-induced**  
1429 **Mutagenesis** (above), and harvested serially from cultures at log phase (4 and 12 hours) and  
1430 stationary phase (24 hours) for dead cell detection using SYTOX blue dead cell stain. Cells were  
1431 stained according to manufactures recommendation. Cells were incubated with SYTOX blue dye  
1432 (1 $\mu\text{M}$ ) for 30 minutes at room temperature and flow cytometry analyses were performed  
1433 immediately. As a positive control, cells were incubated in 95% ethanol for 10 minutes before  
1434 staining. Positive gates for dead cells were set so that  $<0.2\%$  of undyed cipro-treated cells were  
1435 positive, at which  $90\% \pm 5\%$  of the SYTOX-blue dyed positive-control ethanol-treated cells were  
1436 positive.

1437

### 1438 **Statistics**

1439 All statistics were performed in Microsoft Excel or GraphPad PRISM. For comparisons of two  
1440 groups, a two-tailed Students *t*-test was used if data were normally distributed and homoscedastic.  
1441 For comparisons of 3 or more groups, ANOVA with Tukey post-hoc test was used if data were  
1442 normally distributed and homoscedastic, otherwise a Kruskal-Wallis non-parametric test was  
1443 used. For mutation rates and ratios, which are not normally distributed, natural-logarithm  
1444 transformed data were used to calculate 95% confidence intervals as well as performing ANOVAs.

1445

1446

1447 **FIGURES & TABLES**

1448 **Figure 1**  
1449 **Figure 2**  
1450 **Figure 3**  
1451 **Figure 4**  
1452 **Figure 5**  
1453 **Figure 6**  
1454 **Figure 7**  
1455  
1456

1457 **GRAPHICAL ABSTRACT**

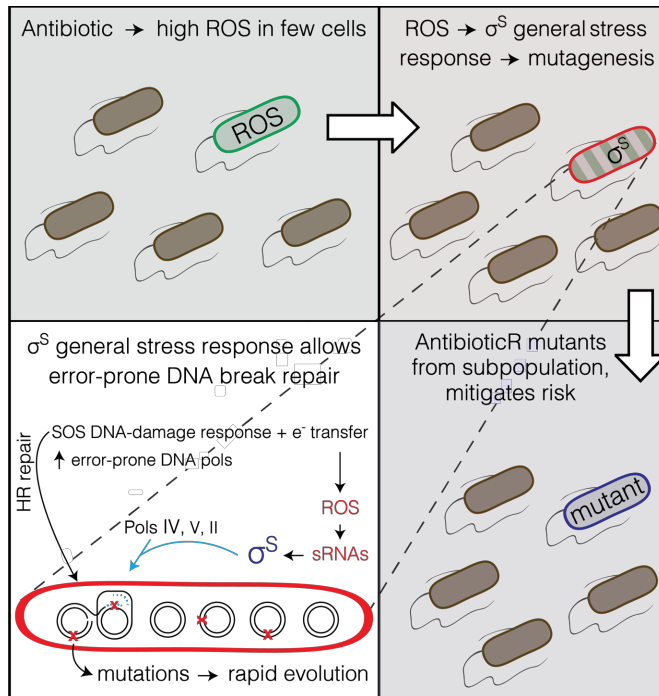

1458

1459 **In Brief**

1460 Bacteria exposed to antibiotic transiently differentiate a small subpopulation of gambler cells  
1461 that increase mutation rate and evolve resistance, while most cells avoid the risk. The gamblers  
1462 are differentiated beginning with the antibiotic inducing reactive oxygen only in subpopulation  
1463 cells. The reactive oxygen activates the general stress response, which allows mutagenic DNA  
1464 break repair in the gambler cells. Multi-chromosome cells are required and, modeling shows,  
1465 can allow high mutation rates and rapid evolution by chromosome cooperation buffering  
1466 deleterious mutations.

1467

1468

1469 **Highlights**

1470

- 1471 • Antibiotic-induced mutable cell subpopulation generates resistant mutants
- 1472 • Mitigates risk to most cells; reactive oxygen →  $\sigma^S$  stress response → gamblers
- 1473 • FDA-approved drug blocks  $\sigma^S$  response and mutagenesis: anti-evolvability drug
- 1474 • Multiple chromosomes needed: chromosome cooperation can allow rapid adaptation

1475

1476

1477

1478

1479 **SUPPLEMENTAL INFORMATION**

1480

1481 Supplemental information includes a discussion file, seven figures and two tables that can be  
1482 found with the article online at \*\*\*

1483

1484 **Supplemental Discussion S1**

1485 **Controls for the FACS-sorted  $\sigma^S$ -high Cell Subpopulation**

1486 We verified that FACS sorted fluorescent  $\sigma^S$ -reporter carrying cells had high  $\sigma^S$  activity by showing  
1487 that they displayed, first, significantly higher levels of  $\sigma^S$ -dependent catalase activity (Figure 3B),  
1488 and, second, more  $\sigma^S$  protein accumulation (Figure S7A) than the cells in the low-fluorescence or  
1489 mock-sorted populations. We also showed by microscopic analyses that the  $\sigma^S$ -response-high  
1490 and -low cells did not differ detectably in cell lengths or sizes (Figure S6D,E) and that  $\sigma^S$ -  
1491 response-high and -low cells have no difference in the numbers of dead or dying cells (Figure  
1492 S7B), indicating that their mutant frequencies can be taken at face value.

1493

1494 **Supplemental Discussion S2**

1495 **Controls for Appearance of ROS-high Subpopulation Before  $\sigma^S$ -high Subpopulation**

1496 In Figure 4A, the ROS-high cell subpopulation is apparent hours before the  $\sigma^S$ -high cell  
1497 subpopulation, with ROS detected by DHR dye and  $\sigma^S$  activity by mCherry fluorescence from a  
1498 gene the transcription of which requires  $\sigma^S$ . We can be sure that the appearance of ROS before  
1499  $\sigma^S$  activity is not the result of the lag between induction of transcription and appearance of a  
1500 translated fluorescent protein because the same result is obtained when ROS and  $\sigma^S$  activity are  
1501 both detected by fluorescent reports each of which requires transcription and translation Figure  
1502 4B. Additionally the lag between induction and appearance of flow-cytometry-detectable  
1503 fluorescent protein is under 15 minutes (Pennington and Rosenberg, 2007), much less than the  
1504 lag between ROS-high and  $\sigma^S$ -high cells (Figure 4).

1505

1506 **Supplemental Discussion S3**

1507 **Peroxide Control for OxyR and SodA Stress-response Activation by Cipro**

1508 Paradoxically, oxidative stress ( $H_2O_2$ ) is known to inhibit  $\sigma^S$  activation through activation  
1509 of oxyS sRNA (Zhang et al., 1998). We find peroxide activates both SodA and OxyR reporters,  
1510 but peroxide alone is not sufficient for activation of the  $\sigma^S$  high-activity population (Figure 4B, right  
1511 panel), indicating that something in addition to  $H_2O_2$  is necessary for  $\sigma^S$ -response  
1512 activation. There might be an additional signal induced by cipro that allows  $\sigma^S$ -response  
1513 activation, or exogenous ROS in the form of  $H_2O_2$  might not substitute adequately for ROS  
1514 induced endogenously by cipro.

1515





1518 (A) Rif<sup>R</sup> cfu carry *rpoB* base-substitution mutations found in two clusters. These cause amino-  
1519 acid changes that reduce rifampicin binding to the RpoB RNA polymerase subunit (Reynolds,  
1520 2000), seen also here. Black, spontaneous; blue cipro-induced mutations.

1521 (B) Amp<sup>R</sup> cfu carry *ampD* mutations. Summary of *ampD* mutation sequences from independent  
1522 Amp<sup>R</sup> clones, isolated from cipro-induced and spontaneous mutants. Loss-of-function mutations  
1523 in *ampD* confer Amp<sup>R</sup> to *E. coli* strain carrying a chromosomal cassette of Enterobacter *ampRC*  
1524 genes (Petrosino et al., 2002) by allowing constitutive expression of the AmpC beta-lactamase,  
1525 which confers resistance. Black, spontaneous, blue; cipro-induced mutations.

1526 (C) Indels are more abundant in cipro-promoted than spontaneous mutations, \* $p < 0.001$ , Chi-  
1527 squared test. Sequences from 24 independent isolates grown in the absence or presence of cipro  
1528 MAC. There were significantly fewer 8-oxo-dG-signature mutations (G·C→T·A and A·T→C·G)  
1529 in cells grown with cipro compared with no cipro, \* $p = 0.01$ , two-tailed Student's *t*-test. Counts of  
1530 24 independent Rif<sup>R</sup> and Amp<sup>R</sup> isolates; \*. <1 indicates zero mutations of the type indicated  
1531 among the 24 isolates, i.e., < 1 per 24 is < 4%.

1532 (D) SYTOX blue (Life Technologies) detection of dead/dying cells show that cell death rates do  
1533 not artificially inflate cipro-induced mutation rates in wild-type above MBR-mutant strains.  
1534 SYTOX-blue-detectable cell death does not differ between the wild-type strain and its MBR-  
1535 defective derivatives that are defective for the SOS response (*lexA*Ind<sup>-</sup>), the  $\sigma^S$  response (*rpoS*), or  
1536 the major error-prone DNA polymerase (*dinB*). Thus the concern of Frenoy and Bonhoeffer  
1537 (Frenoy and Bonhoeffer, 2018) that bacterial cell death might cause overestimation of apparent  
1538 antibiotic-induced mutation rates, predicted by their mathematical modeling, cannot account for  
1539 the higher mutation rate in wild-type than MBR-mutant strains (Figure 1F). Moreover, it cannot  
1540 account for the difference between the large  $\sigma^S$  low-activity (non-mutagenic) cell subpopulation  
1541 and the small  $\sigma^S$  high-activity (mutagenic gambler) cell subpopulation, which show similar levels  
1542 of cell death (Figure S7B). Furthermore, the mathematical modeling of (Frenoy and Bonhoeffer,  
1543 2018) showed no such potential inflation of mutation rate in the case of either—(i) a cell  
1544 subpopulation producing most mutants; or (ii) multi-chromosome cells (Frenoy and Bonhoeffer,  
1545 2018), both of which we show are true for cipro-induced cross-resistance mutagenesis (Figure 4A-  
1546 C and Figure 7A, respectively).

1547 (E) The SOS and general  $\sigma^S$  stress responses are epistatic for mutagenesis, i.e. act in the same  
1548 mutation pathway. Cipro-induced mutation rates per Figure 1 and Methods. Means  $\pm$  95%  
1549 confidence intervals of  $n \geq 3$  independent experiments. \*Differs from WT value,  $p < 0.01$ , one-way  
1550 ANOVA with Tukey's post-hoc test of natural-log transformed data.

1551 (F) Thiourea does not reduce mutagenesis further in  $\Delta rpoS$  cells, which lack  $\sigma^S$ . The data imply  
1552 that ROS promote mutagenesis in the  $\sigma^S$ -response-dependent mutation pathway.

1553 (G) Correlation of antibiotic and mutation-promotion activities of cipro. Because the antibiotic  
1554 activity of cipro results from DSB-generation, these data imply that cipro-provoked DSBs also  
1555 drive the mutagenesis. Rif<sup>R</sup> and Amp<sup>R</sup> mutation rates were assayed and estimated for different  
1556 doses of cipro (1, 2, 4, 8, and 12 ng/mL). Pearson correlation coefficient.

1557 (H) Known spontaneous DSB-promoting proteins required for MBR in starvation-stressed cells  
1558 are not required for MBR induced by cipro. The  $\sigma^E$  (RpoE) membrane stress response (Gibson et  
1559 al., 2010) and RNA-DNA hybrids (Wimberly et al., 2013) promote DSBs at some loci in  
1560 starvation-stress-induced MBR. RNA-DNA-hybrid removal by RNase HI (*rnhA*), and prevention  
1561 by loss of Mfd (which dislodges stalled RNA polymerases) promote DSBs and underlie about half  
1562 of mutagenesis in starvation-induced MBR (Wimberly et al., 2013), but neither is required for

1563 MBR instigated by cipro, supporting the hypothesis that cipro-provoked DSBs drove mutagenesis.  
1564 Mutation rates estimated using the MSS-maximum likelihood method. Data and statistics per (E).  
1565

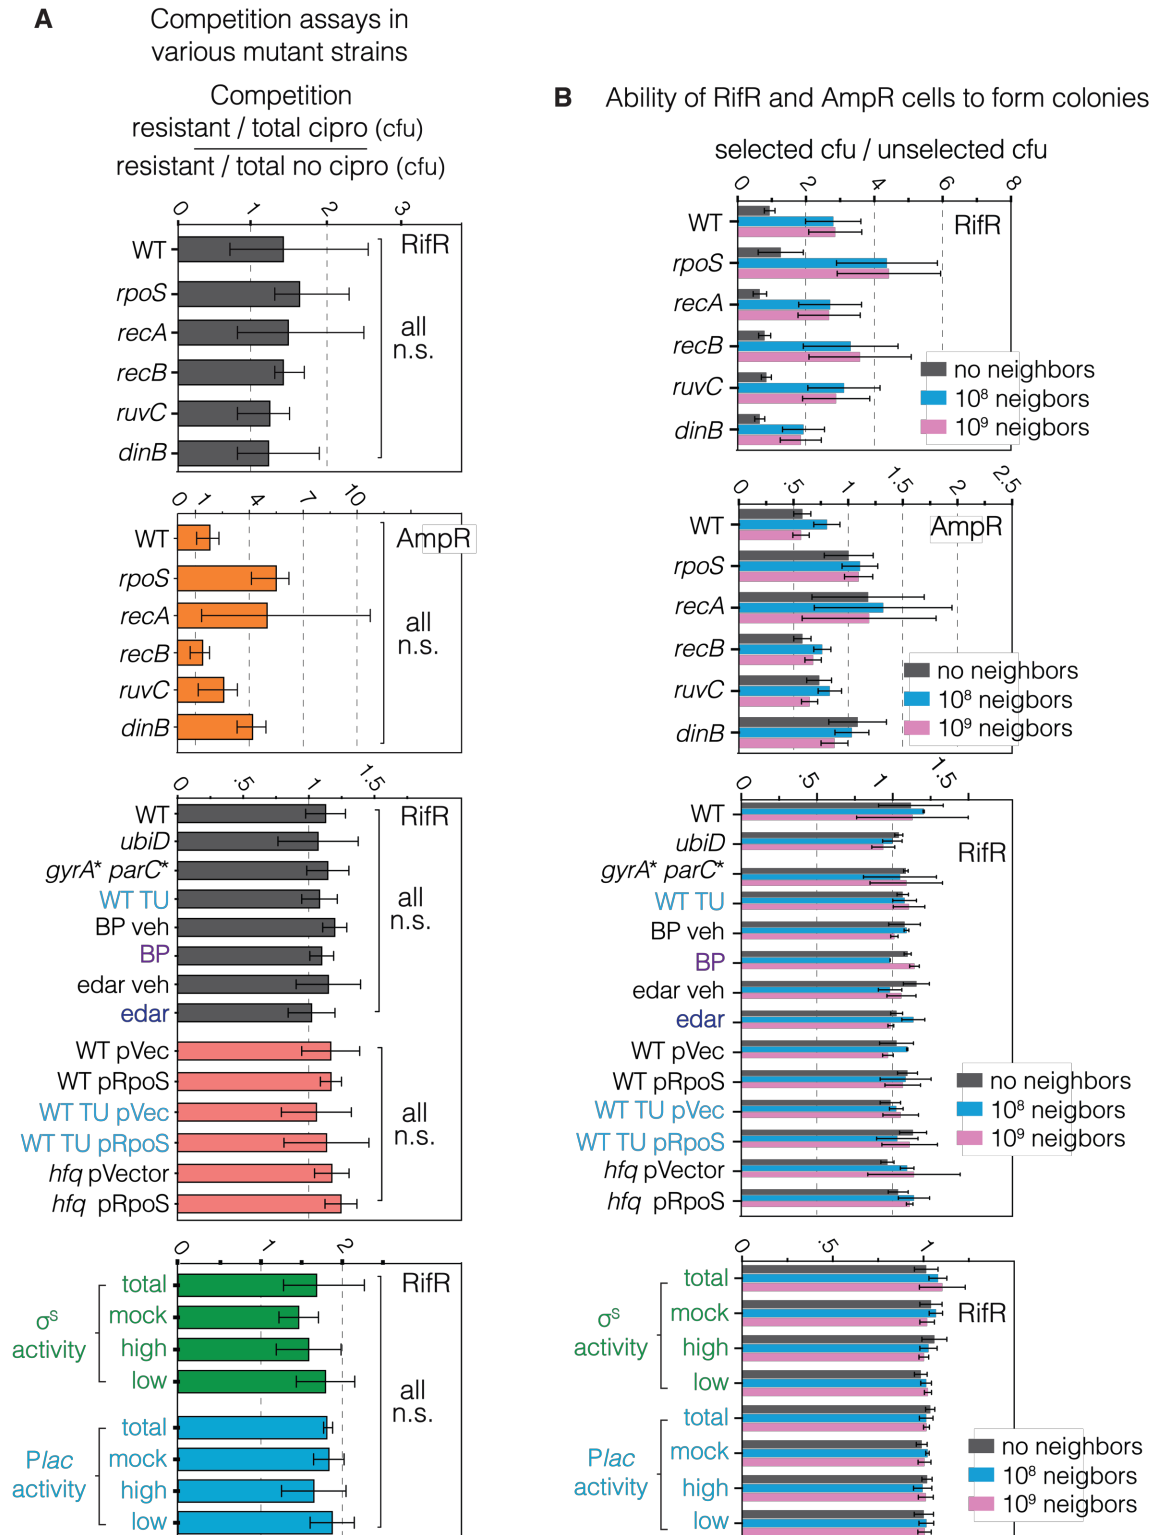

1566

1567

1568

1569

1570

**Figure S2. No Growth or Colony-Formation Defects in Rifampicin- and Ampicillin-Resistant Mutants (Figures 1, 2, 3, 4, 5, 6, and 7)**

We excluded the possibility that possible reduced growth rates of MBR-defective-mutant strains, or ROS-scavenged cells, in cipro, or as colonies on Rif and Amp plates after cipro might cause

1571 artificial apparent reductions in mutant frequencies (used to estimate mutation rates) for various  
1572 mutants tested. We show no growth disadvantage in cipro of Rif<sup>R</sup> or Amp<sup>R</sup> MBR-mutant or  
1573 ROS-scavenged cells relative to wild-type unscavenged cells, and no defect in forming colonies  
1574 afterward.

1575 (A) None of the Rif<sup>R</sup> or Amp<sup>R</sup> derivatives of mutant strains assayed in this study is more  
1576 disadvantaged by cipro than wild-type cells. This means that reductions in Rif<sup>R</sup> or Amp<sup>R</sup> mutant  
1577 cfu in these strains reflects reduced mutagenesis, not inability of the Rif<sup>R</sup> or Amp<sup>R</sup> mutants to  
1578 survive the assay relative to wild-type cells. Competition assays measuring percent of Rif<sup>R</sup> or  
1579 Amp<sup>R</sup> cells in culture after growth to saturation under conditions identical to mutation assays in  
1580 the absence or presence of cipro MAC. Initial conditions were 50% sensitive and 50% resistant  
1581 cells. Results shown as ratio of % Rif<sup>R</sup> or Amp<sup>R</sup> cells grown in the presence of cipro relative to %  
1582 of Rif<sup>R</sup> cells grown in the absence of cipro. A value of 1 indicates no difference in growth. Mean  
1583 and 95% CI of at least 3 independent experiments. For  $\sigma^S$  activity and *lac* activity bar graphs, data  
1584 represent mean and range of 2 independent experiments. n.s., not significantly different from the  
1585 wild-type value at  $p < 0.01$  one-way ANOVA with Tukey's post-hoc test.

1586 (B) Reconstruction experiments show that Rif<sup>R</sup> and Amp<sup>R</sup> derivatives of the various MBR- and  
1587 other-mutant strains assayed form colonies under reconstructions of selective conditions as well  
1588 as those in the wild-type background. These data indicate that reductions in Rif<sup>R</sup> or Amp<sup>R</sup> mutant  
1589 cfu in strains assayed reflect reduced mutagenesis relative to the wild-type strain background, not  
1590 inability of the Rif<sup>R</sup> or Amp<sup>R</sup> derivatives to form colonies under when selected. Results expressed  
1591 Rif<sup>R</sup> cfu titers from colonies formed on cipro divided by the total cfu assayed on LBH (non-  
1592 selective) plates without cipro, and plated with or without sensitive neighbor cells. Sensitive  
1593 neighbor cells are expected to be present on initial contact with the drug selection plates, but to die  
1594 over time from exposure to rifampicin or ampicillin. A value of 1 indicates no deviation in the  
1595 number of cfu scored in the presence of cipro from those in the absence of cipro. If greater than  
1596 1, more resistant cfu appeared under selective conditions than on no-drug plates. If less than 1,  
1597 fewer mutant cells were able to form cfu on drug plates than no-drug plates. The conclusion is  
1598 that reduction of Rif<sup>R</sup> or Amp<sup>R</sup> cfu of the various mutants tested under selective conditions is not  
1599 greater than in the wild-type, such that reductions relative to WT reflect reduced mutagenesis, not  
1600 reduced mutant-cell outgrowth into a visible colony. Mean  $\pm$  95% CI of at least 3 independent  
1601 experiments. For  $\sigma^S$  activity and *lac* activity bar graphs, data represent mean  $\pm$  range of 2  
1602 independent experiments. None was significantly different from the wild-type, one-way ANOVA  
1603 with Tukey's post-hoc test.

1604

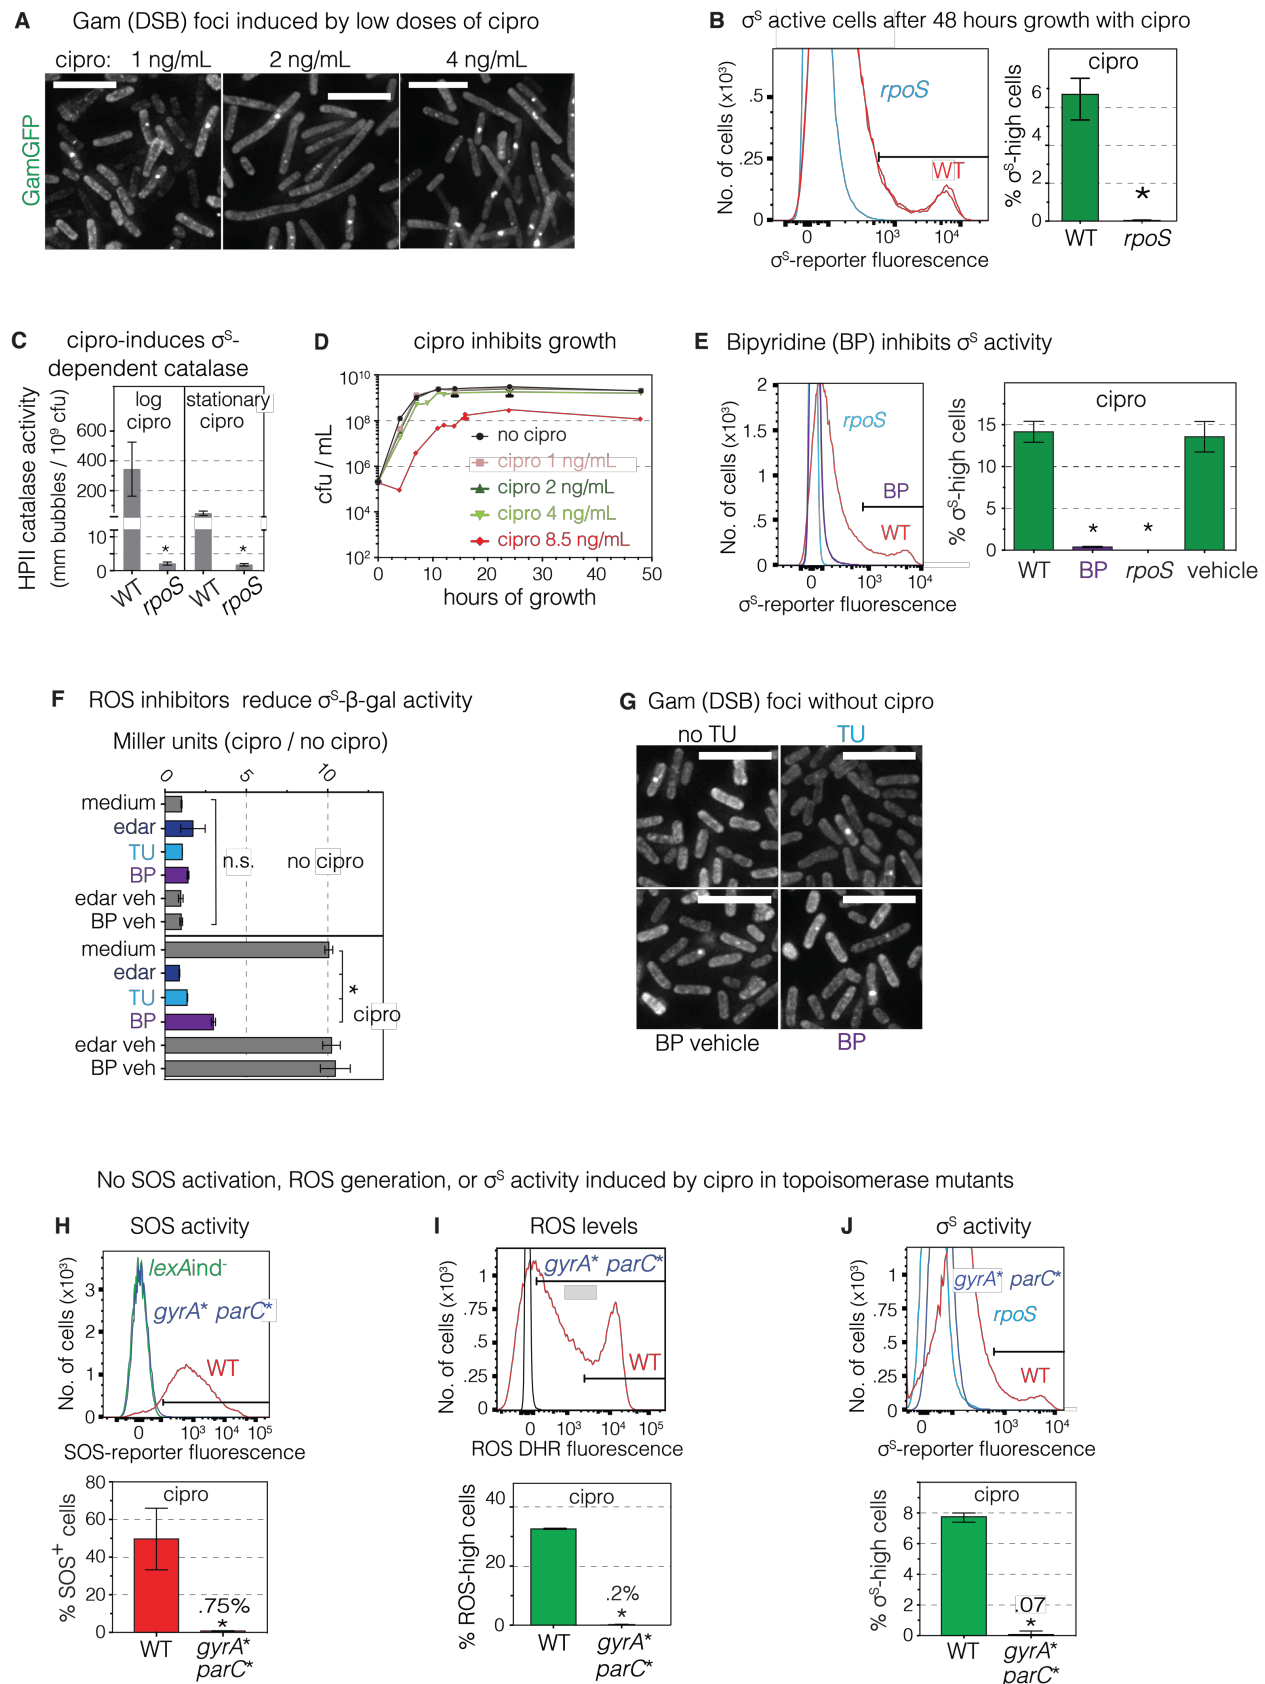

1605 **Figure S3. Cipro Induces GamGFP DSB Foci Dose-Dependently, SOS, ROS and  $\sigma^S$  via**

1606 **Binding Target Topoisomerases, and Inhibition of  $\sigma^S$ - or  $\sigma^S$ -*lacZ* Activity by ROS Reducers**  
1607 **BP, TU, and Edaravone (Figures 1, 2, and 3)**

1608 (A) Cipro induces GamGFP DSB foci dose dependently. Representative GamGFP foci in cells  
1609 grown with 1, 2, and 4 ng/mL of ciprofloxacin. Quantification, Figure 1G. White scale bar  
1610 indicates 5 $\mu$ m.

1611 (B)  $\sigma^S$  high-activity cells remain significantly activated after growth in cipro for 48 hours (AmpR  
1612 assays conditions) detected using the  $\sigma^S$  response reporter *yiaG-yfp* (yellow fluorescence). Means  
1613  $\pm$  range of 2 independent experiments. \*Differs from wild-type value at  $p < 0.01$ , two-tailed  
1614 Student's *t*-test.

1615 (C) The  $\sigma^S$ -dependent HPII catalase activity (Iwase et al., 2013) is induced by cipro in both log-  
1616 and stationary-phase cells. HPII measured as bubbles per 10<sup>9</sup> cells. Means  $\pm$  SEM of 3  
1617 independent experiments. \*Differs from wild-type value at  $p < 0.01$ , one-way ANOVA with  
1618 Tukey's post-hoc test.

1619 (D) Extents of inhibition of *E. coli* growth at various cipro concentrations. Growth curves of *E.*  
1620 *coli* in the presence of 0, 1, 2, 4, and 8.5 ng/mL of ciprofloxacin. Where not visible, error bars are  
1621 smaller than the symbol. Means  $\pm$  95% confidence intervals of 3 independent experiments.

1622 (E) ROS are required for cipro induction of  $\sigma^S$  general stress response activity. ROS-preventing  
1623 agent 2,2' bipyridyl (BP, 0.25mM) inhibits cipro induction of  $\sigma^S$  activity in flow cytometric  
1624 fluorescence assay of log-phase cells carrying the *yiaG-yfp*  $\sigma^S$ -response reporter. Afu, arbitrary  
1625 fluorescence units. Histograms show the distribution of individual cells'  $\sigma^S$  activity in the presence  
1626 of BP. Means  $\pm$  range of 2 independent experiments. \*Differs from wild-type value at  $p < 0.01$ ,  
1627 one-way ANOVA with Tukey's post-hoc test.

1628 (F) ROS are required for accumulation of  $\sigma^S$  in response to cipro, assayed with the  $\sigma^S$ -beta-  
1629 galactosidase translational-fusion reporter in log-phase growing cells. Data represented as relative  
1630 to data in untreated cells (no-cipro) in Miller units. Means  $\pm$  range of 2 independent experiments.  
1631 \*Differs from wild-type value at  $p < 0.01$ , one-way ANOVA with Tukey's post-hoc test.

1632 (G) Spontaneous GamGFP foci are not the result of spontaneous ROS (control for cipro-treated  
1633 cells, Figure 2F). ROS reducers thiourea (100 mM, TU) and 2,2' bipyridine (0.25mM, BP) do not  
1634 change spontaneous levels of GamGFP DSB foci in log-phase growing cells. The ferrous iron  
1635 chelator 2,2' bipyridyl (bp) inhibits ROS-forming Fenton reactions. Thiourea (TU) scavenges  
1636 hydroxyl radicals. White scale bar indicates 5 $\mu$ m.

1637 (H-J) Cipro binding to its target type-II topoisomerases, gyrase and/or Topo IV (encoded by *parC*)  
1638 is required for activation of (H) the SOS response, (I) generation of ROS, and (J) activation of the  
1639  $\sigma^S$  general stress response. The *gyrA\** and *parC\** mutant alleles encode subunits of gyrase and  
1640 Topo IV, respectively, that are functional but are not bound by cipro, and so are not inhibited by  
1641 the drug. Representative flow cytometry histograms using the *gyrA\** S83L/D87Y *parC\**  
1642 S80I/E84G. SOS,  $\sigma^S$  activity, and ROS measured by flow cytometry in strains carrying the  
1643 chromosomal SOS fluorescence reporter transgene *P<sub>sulAm</sub>Cherry*, the  $\sigma^S$ -response reporter *yiaG-*  
1644 *yfp*, or stained with the ROS specific dye dihydrorhodamine 123 (DHR). (Means  $\pm$  range of 2  
1645 independent experiments. \*Differs from wild-type value at  $p < 0.01$ , two-tailed Student's *t*-test.  
1646

**A** Cipro-induced GamGFP (DSB) foci are not due to autofluorescence

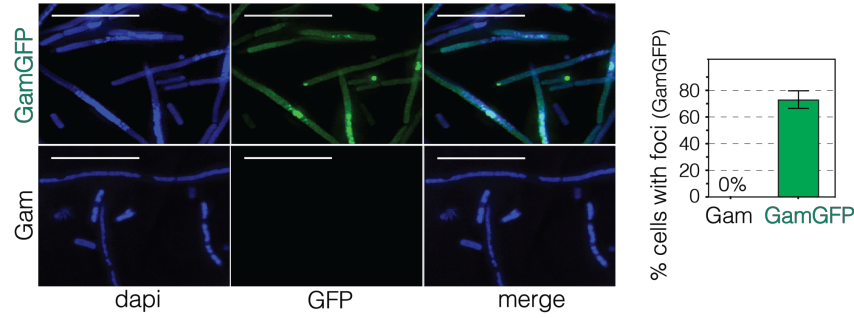

SOS,  $\sigma^S$ , ROS, and *Plac* activity detected by fluorescence is greater than cipro-induced autofluorescence

**B** SOS induced *PsuIA-mCherry* fluorescence

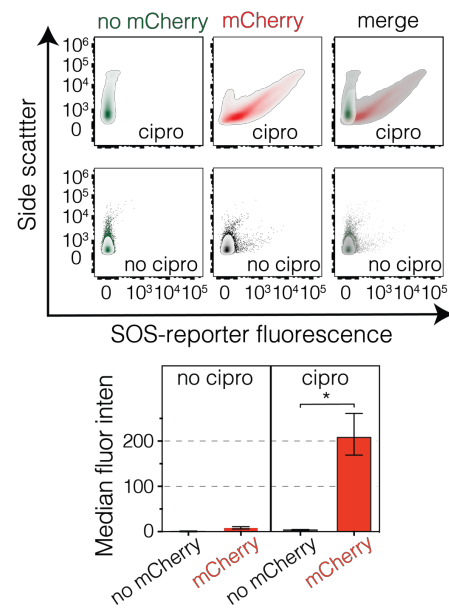

**C**  $\sigma^S$  induced *PyaG-yfp* fluorescence

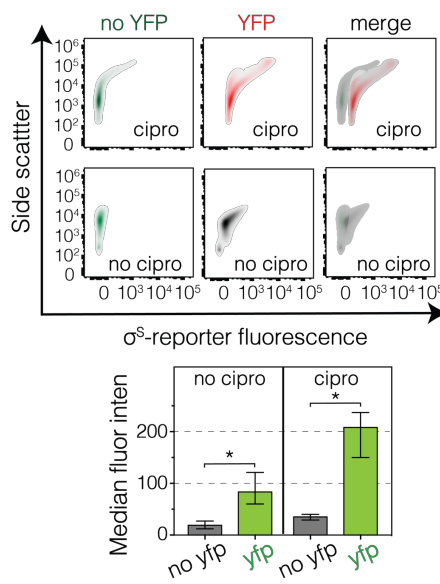

**D** ROS detected using DHR dye

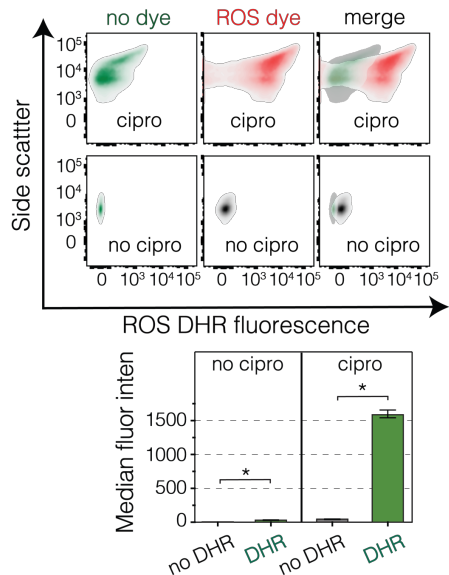

**E** IPTG induced *Plac-cfp* fluorescence

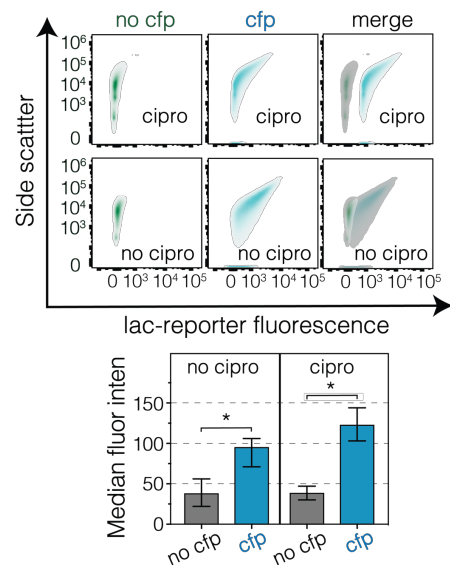

1647 **Figure S4. Fluorescence Data Exceed Cipro-Induced Autofluorescence**

1648 **Figure S4. Fluorescence Data Exceed Cipro-Induced Autofluorescence (Figures 1, 2, 3, 4, 5,**  
1649 **and 6)**

1650 (A) Autofluorescence induced by cipro does not cause foci. Cells that produce Gam or GamGFP  
1651 were grown in 8.5ng/mL cipro. Microscopy was performed to capture GFP fluorescence. Only  
1652 cells with GamGFP turn green and form foci. At least 200 cells were quantified per experiment.

1653 (B-E) Autofluorescence does not contribute to cipro-promoted fluorescence-reporter activity  
1654 detected in flow-cytometric assays. Autofluorescence has been reported in bacterial cells treated  
1655 with bactericidal antibiotics (Renggli et al., 2013). To ensure that fluorescence signals are above  
1656 auto-fluorescence background levels, we compared MAC cipro treatment of cells without and with  
1657 the reporters of—

1658 (B) the SOS response (the  $\Delta att\lambda::P_{sulAMCherry}$  transgene);

1659 (C)  $\sigma^S$  activity (*viaG-yfp* reporter);

1660 (D) ROS, assayed using the dye dihydrorhodamine (DHR); or

1661 (E) cyan fluorescence from  $P_{lac}cfp$  activity induced by IPTG (1mM). Cipro-induced  
1662 autofluorescence in cells without fluorescence reporters in the red, yellow, green, and cyan  
1663 emission wavelengths produce less fluorescence than the positive-fluorescence readings in cells  
1664 with the chromosomal fluorescence reporters, or ROS measured using DHR. The  
1665 autofluorescence does not overlap with induced fluorescence signals in cells carrying the  
1666 fluorescent reporters or dye.

1667 A-E, data represent mean and range of 2 independent experiments. \*Different from wild-type,  
1668  $p < 0.01$  using a (A) two-tailed Student's *t*-test and (B-E) one-way ANOVA with Tukey's post-hoc  
1669 test.

1670



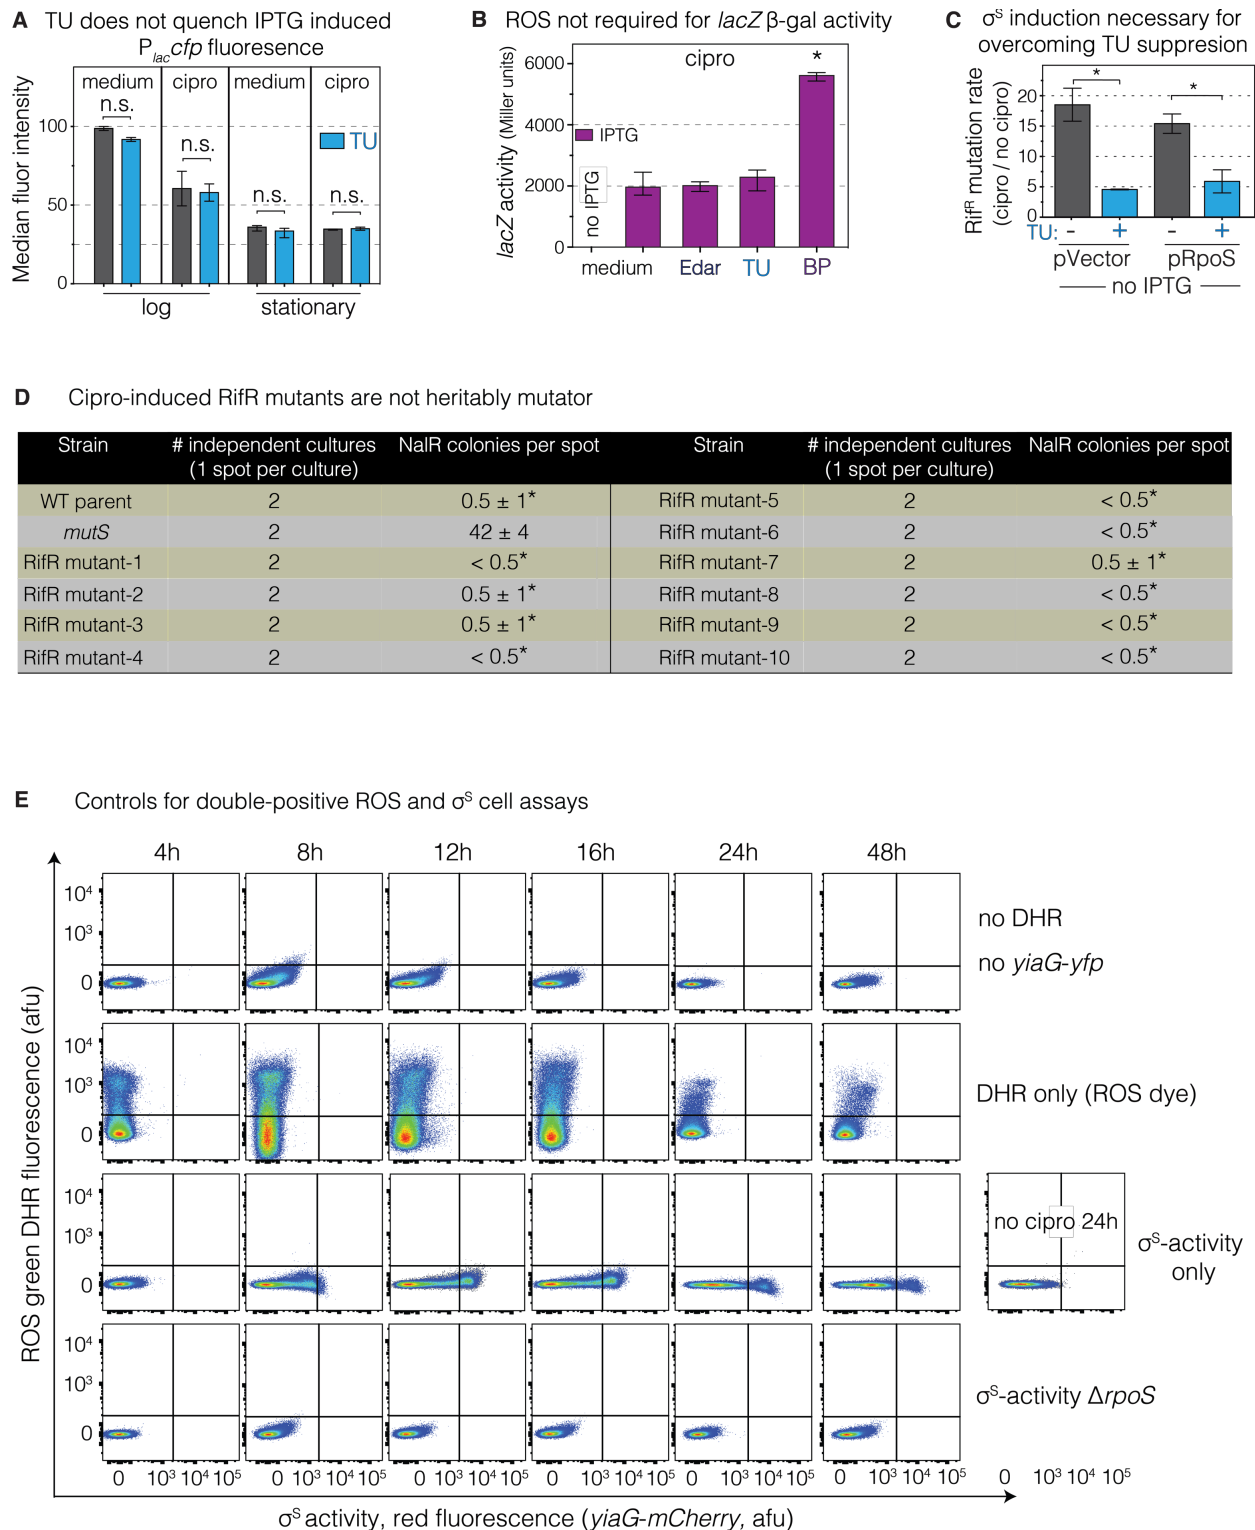

1671 **Figure S5. No Effect of ROS Reducers on  $\beta$ -gal Activity or Fluorescent-Protein Activation;**  
 1672 **IPTG Induction of  $\sigma^S$  Substitutes for ROS in Mutagenesis; and Single and No Fluorescence**  
 1673 **Controls for ROS and  $\sigma^S$  Detection in Same Cells (Figures 2, 3, 4, and 5)**

1674 (A) Thiourea (TU) does not quench or inhibit the accumulation of IPTG-induced cyan fluorescent  
 1675 protein under the control of the *lac* promoter in either log- or stationary-phase cells. Cells with a

1676 chromosomal *P<sub>lacCfp</sub>* reporter were grown under conditions of the mutation assays in the presence  
1677 or absence of 1 mM IPTG and TU (100 mM), and flow cytometric assays performed. Negative  
1678 control for [Figure 4B](#). Means  $\pm$  range of 2 independent experiments. n.s. not significant, one-way  
1679 ANOVA with Tukey's post-hoc test.

1680 (B) ROS are not required for *lac*-reporter activity. ROS reducers TU, BP, and edaravone do not  
1681 inhibit activation or activity of  $\beta$ -galactosidase enzyme. Cells were grown with IPTG (100mM),  
1682 cipro and TU, BP, or edaravone and  $\beta$ -gal activity measured. Negative control for [Figure 5D](#).  
1683 Means  $\pm$  range of 2 independent experiments. \*Differs from no-cipro control IPTG value,  $p < 0.01$ ,  
1684 one-way ANOVA with Tukey's post-hoc test.

1685 (C) Induction of *rpoS* transcription from the engineered expression cassette is required for  $\sigma^S$   
1686 substitution for ROS in mutagenesis. TU inhibition of mutagenesis is not suppressed in cells with  
1687 pRpoS plasmid if no IPTG is added. Negative control for [Figure 2H](#). Cipro-induced RifR  
1688 mutagenesis was measured in cells containing IPTG-inducible vector or pRpoS plasmid growing  
1689 in the presence or absence of TU (100 mM) and no IPTG. Means  $\pm$  range of 2 independent  
1690 experiments. \*Differs as indicated in figure,  $p < 0.01$ , one-way ANOVA with Tukey's post-hoc test.

1691 (D) Cipro-induced RifR mutants are not heritably mutator. Nalidixic-acid-resistance-mutagenesis  
1692 assay. Two independent cultures of the wild-type parent, stable mutator (mismatch repair  
1693 defective *mutS*), and 10 different cipro-induced RifR mutant isolates were spread on plates, then  
1694 spotted with nalidixic acid, incubated, and NalR mutant papillae in the zones of inhibition counted.  
1695 \*Differs from *mutS* mutator strain,  $p < 0.0001$ , one-way ANOVA with Tukey's post-hoc test. These  
1696 data show that the state of increased mutagenesis seen in  $\sigma^S$ -active gambler cells, relative to the  
1697 whole population and to the  $\sigma^S$ -low main subpopulation ([Figure 3A](#)), is transient, and not a  
1698 heritable mutator state.

1699 (E) No fluorescence and single-color controls for detecting both ROS (DHR dye) and  $\sigma^S$ -activity  
1700 (*viaG-mCherry*) in cultures grown in the presence of ciprofloxacin. Cells were harvested for flow  
1701 cytometry serially from cultures at 4, 8, 12, 16, and 24 hours after the addition of cipro. Negative  
1702 controls for [Figure 4A](#) and B. Representative flow-cytometry plots from 3 experiments.

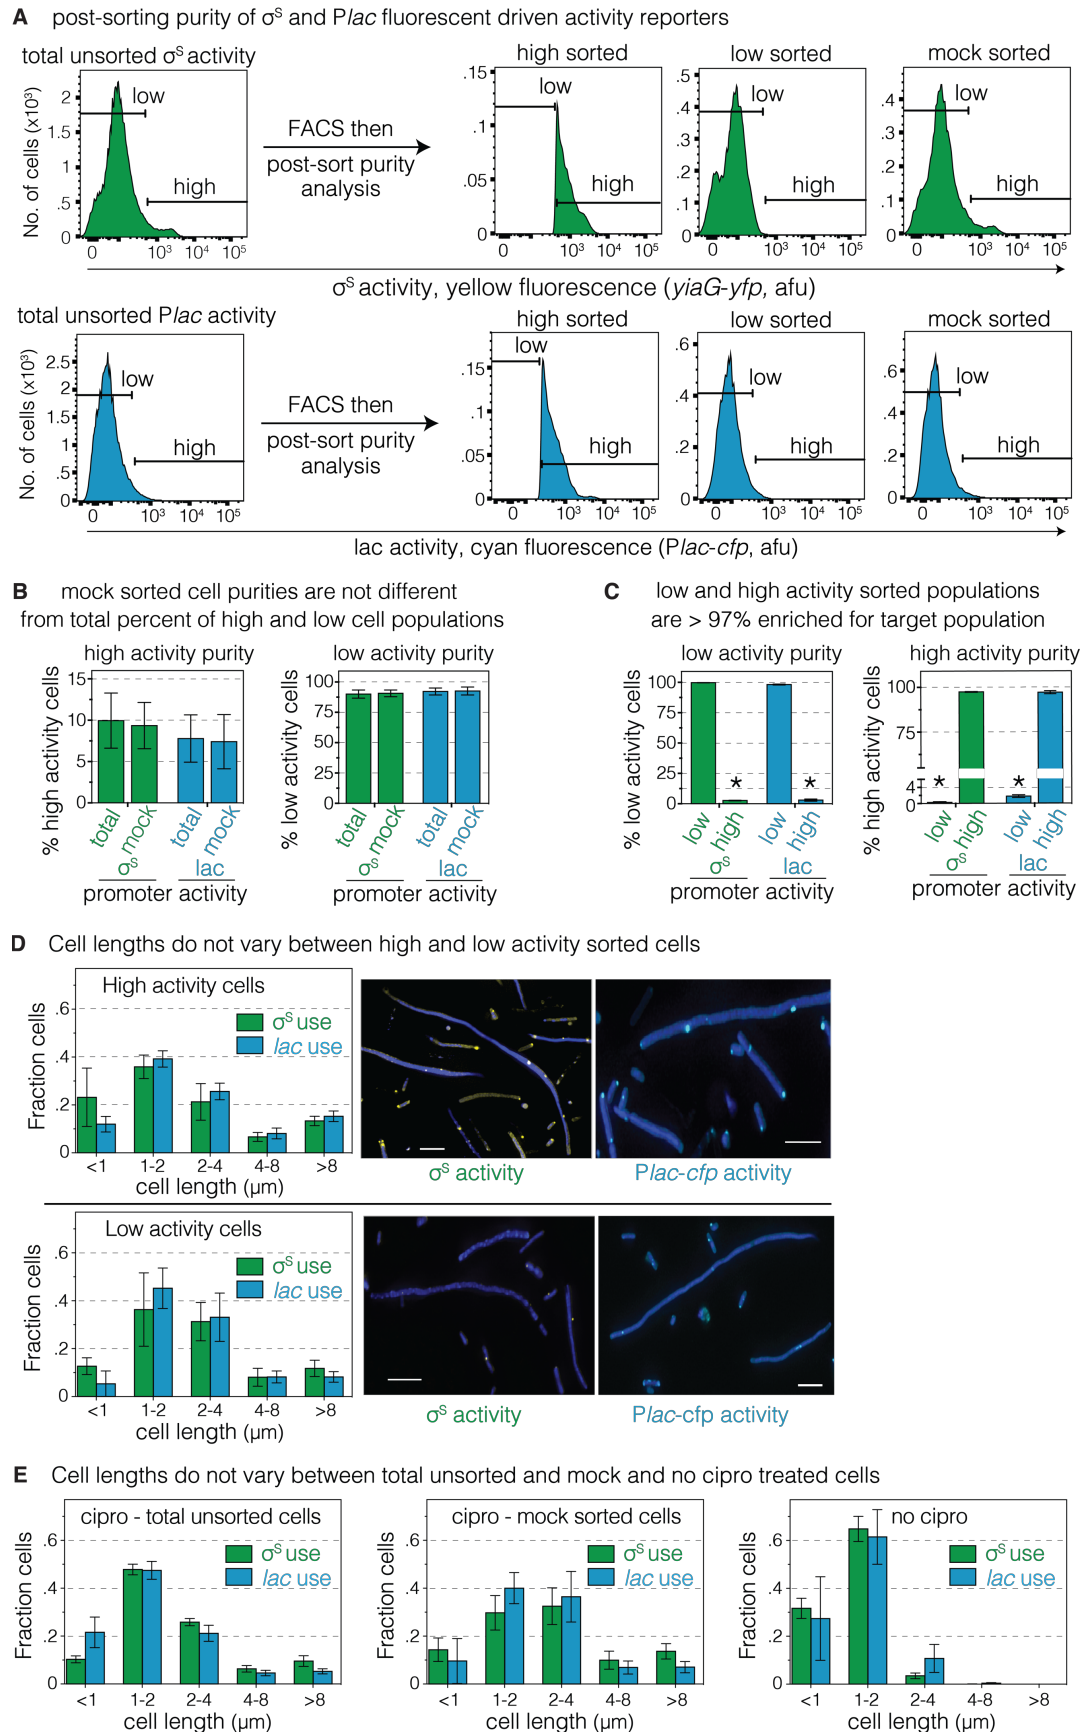

1703

**Figure S6. Purity of Sorted Cells and Cell Lengths in Subpopulations**

1704 **Figure S6. Purity of Sorted Cells and Cell Lengths in Subpopulations (Figure 3)**

1705 (A) Sorted cell populations are at least 97% pure. Post-sort purity checks verify expected  
1706 fluorescence intensities in cells in mock-sorted, and low- and high-fluorescence sorted cell  
1707 populations.

1708 (B and C) Quantification of post-sort purity. Data represent mean and range of 2 independent  
1709 experiments; \*  $p < 0.0001$ , using a one-way ANOVA with Tukey's post-hoc test.

1710 (D and E) Cell length frequencies do not differ between *lac*-reporter and *viaG-yfp*  $\sigma^S$ -response  
1711 reporter sorted populations. Mean and SD of 3 independent experiments counting  $> 300$  cells. No  
1712 differences in cell lengths were detected using a one-way ANOVA with Tukey's post-hoc test.

1713 (D) High and low  $\sigma^S$  activity sorted cells. Representative merged images showing both DAPI DNA  
1714 staining and either CFP or YFP fluorescence and quantitation of cell lengths from different  
1715 populations. Scale bar represents  $5\mu\text{M}$ .

1716 (E) Unsorted, mock-sorted, and untreated cell controls.

1717

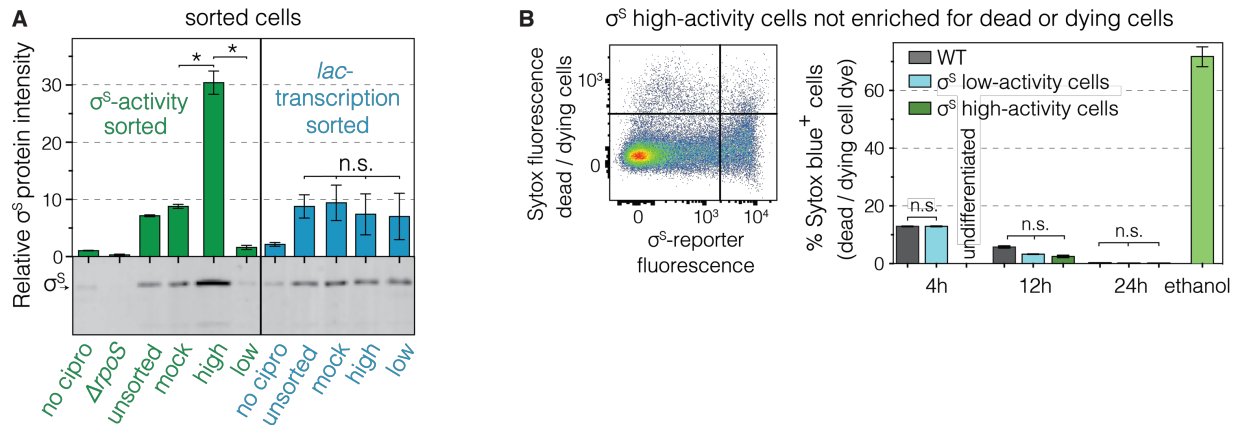

1718 **Figure S7. Accumulation of protein in  $\sigma^S$ -high cells, and negligible dead cells in both  $\sigma^S$  high-**  
 1719 **and  $\sigma^S$  low-activity cell subpopulations (Figure 3)**

1720 (A) High  $\sigma^S$  protein levels in FACS sorted  $\sigma^S$  high-activity cells. Western blots from cell  
 1721 subpopulations. Means  $\pm$  SEM of 3 independent experiments. \* $p$ <0.01, one-way ANOVA with  
 1722 Tukey's post-hoc test; n.s., not significant.

1723 (B) Cell death is not different in  $\sigma^S$  high- or low-activity cell subpopulations. Flow cytometry  
 1724 assay for cell death in log phase (4h and 12h) and stationary phase (24h) of strains with the *viaG*-  
 1725 *mCherry*  $\sigma^S$ -response reporter stained with SYTOX blue dead-cell stain, quantifies single cells  
 1726 with dye-permeable membranes. Representative flow cytometry distribution of live and dead cells  
 1727 with high and low  $\sigma^S$  activity. Means  $\pm$  range of 2 independent experiments. n.s., not significant,  
 1728 one-way ANOVA with Tukey's post-hoc test.  
 1729
